# Supplementary material for: Human Wharton’s Jelly Mesenchymal Stromal Cell-Derived Small Extracellular Vesicles Drive Oligodendroglial Maturation by Restraining MAPK/ERK and Notch Signaling Pathways
Source: Front Cell Dev Biol. 2021 Mar 23;9:622539. doi: 10.3389/fcell.2021.622539 (PMC8044995; doi:10.3389/fcell.2021.622539)
Supplement: Supplementary file 1 [file Table_1.XLSX]

## Sheet: p437_ExosomeVsTotal_DEResults
Differential expression of known mature miRNAs between WJ-MSC and WJ-MSC-derived sEV
	Normalised counts (Number of reads per miRNA corrected for differences in total sequencing depth between samples)												mean normalised counts		Differential expression test results (DESeq2)
miRNA	sEV (6 biological replicates)						WJ-MSC (6 biological replicates)						exosome	total	log2FoldChange	lfcSE	stat	pvalue	padj
hsa-miR-142-5p	114.266	455.764	791.161	381.168	102.171	79.0883	1.55269	1.75399	2.37954	1.12394	2.13504	1.53246	320.603	1.74628	7.38151	0.564308	13.0806	4.24816e-39	3.92955e-36
hsa-miR-451a	2490.99	445.636	674.813	136.131	265.645	110.724	0.665438	0.876996	4.75908	1.87323	1.37253	2.40816	687.323	1.99257	8.15349	0.693073	11.7642	5.96545e-32	2.75902e-29
hsa-miR-1246	182.825	37.6186	151.251	71.7783	98.4558	593.162	0.887251	0.584664	1.58636	1.12394	3.20256	2.40816	189.182	1.63215	6.60403	0.635331	10.3946	2.62274e-25	8.0868e-23
hsa-miR-19a-3p	91.4125	261.883	694.205	650.955	692.906	276.809	16.6359	7.60063	1.18977	5.24503	1.83004	3.94062	444.695	6.07367	6.06209	0.585965	10.3455	4.38662e-25	1.0144e-22
hsa-miR-4516	1599.72	52.8108	523.562	700.458	776.5	5544.09	10.2034	0.876996	2.77613	3.37181	2.59255	15.1057	1532.86	5.8211	7.69863	0.774396	9.94147	2.74754e-23	5.08294e-21
hsa-miR-4454	1234.07	34.0014	341.285	1391.01	282.364	1107.24	12.1997	11.6933	15.0704	2.99716	7.01513	5.69201	731.662	9.11128	6.14716	0.633758	9.69955	3.02839e-22	4.66876e-20
hsa-miR-222-5p	228.531	447.083	1128.57	3536.94	529.432	585.254	53.9005	22.5096	20.6227	19.1069	29.8906	22.9869	1075.97	28.1695	5.15197	0.557069	9.24835	2.27994e-20	3.01278e-18
hsa-miR-6529-5p	0	62.9388	19.3912	86.629	65.018	23.7265	0	0.292332	0	0	0	0	42.9506	0.048722	8.84328	0.960337	9.20852	3.30667e-20	3.82334e-18
hsa-miR-144-3p	22.8531	152.645	131.86	17.3258	83.5945	7.90883	0	0	0.79318	0	0	0	69.3645	0.132197	8.80439	0.998367	8.81879	1.15702e-18	1.18916e-16
hsa-miR-3196	114.266	57.1514	279.233	193.059	79.8792	55.3618	1.55269	1.46166	9.91475	1.12394	1.98254	0.875693	129.825	2.81854	5.4341	0.618104	8.79156	1.47497e-18	1.36434e-16
hsa-miR-7704	38964.6	146.857	663.179	450.471	195.054	12179.6	10.4252	7.3083	13.0875	2.24787	1.83004	2.18923	8766.62	6.18135	9.54391	1.09165	8.74261	2.27792e-18	1.91552e-16
hsa-let-7a-3p	45.7062	135.282	201.668	433.145	274.933	260.991	21.294	10.2316	2.77613	3.74645	4.88009	10.9462	225.288	8.97908	4.58552	0.526212	8.71422	2.92773e-18	1.97844e-16
hsa-miR-203a-3p	22.8531	36.8952	283.111	64.353	79.8792	142.359	0.443625	2.33866	0.79318	5.24503	2.59255	0.875693	104.908	2.04812	5.56875	0.63886	8.7167	2.86433e-18	1.97844e-16
hsa-miR-486-3p	0	21.703	151.251	136.131	200.627	63.2707	0.665438	0.292332	2.37954	2.99716	1.83004	2.62708	95.4972	1.7986	5.64983	0.648536	8.71167	2.99439e-18	1.97844e-16
hsa-miR-205-5p	22.8531	54.9811	286.99	59.4028	146.755	47.453	0	0.292332	2.37954	2.99716	2.28754	1.75139	103.072	1.61799	5.8619	0.689336	8.50368	1.83666e-17	1.1326e-15
hsa-miR-136-5p	662.74	810.971	275.355	351.466	728.201	727.613	66.322	34.2028	7.9318	6.36897	11.5902	30.4303	592.724	26.141	4.41318	0.528338	8.35294	6.65853e-17	3.84946e-15
hsa-miR-193a-3p	708.447	2126.18	6523.2	1571.7	4692.44	1842.76	296.342	104.07	129.288	63.315	225.857	140.111	2910.79	159.83	4.11869	0.502884	8.19015	2.60897e-16	1.41958e-14
hsa-miR-141-3p	22.8531	18.8093	31.0259	44.5521	18.5766	7.90883	1.10906	0.292332	0.79318	1.12394	0.152503	0.65677	23.9543	0.687964	5.10032	0.627538	8.12751	4.38203e-16	2.25188e-14
hsa-miR-19b-3p	137.119	908.634	957.925	1284.58	1666.32	1336.59	106.026	55.2508	11.5011	12.3633	23.638	28.8979	1048.53	39.6129	4.62767	0.572334	8.08561	6.18518e-16	3.01121e-14
hsa-miR-873-5p	91.4125	274.905	1012.22	457.896	533.147	419.168	54.5659	24.8482	54.7294	49.4531	53.071	49.0388	464.792	47.6178	3.27542	0.412001	7.95002	1.86484e-15	8.6249e-14
hsa-miR-98-3p	22.8531	125.154	50.4171	47.0272	224.776	47.453	5.76713	2.33866	0	0.374645	1.83004	1.53246	86.2802	1.97382	5.30583	0.683549	7.76217	8.34857e-15	3.67735e-13
hsa-miR-376b-3p	68.5593	167.837	120.225	292.064	306.513	79.0883	15.0833	6.13897	0	5.61968	2.44005	7.00555	172.381	6.04792	4.732	0.623553	7.58877	3.22964e-14	1.35792e-12
hsa-miR-6858-5p	22.8531	17.3624	108.591	146.032	50.1567	7.90883	2.88356	2.63099	1.98295	4.1211	2.44005	2.62708	58.8173	2.78095	4.38415	0.582861	7.52178	5.40351e-14	2.17315e-12
hsa-miR-3677-3p	0	26.7671	58.1736	54.4525	11.1459	7.90883	1.33088	0.292332	0.79318	0	0.305006	0.65677	26.408	0.563027	5.46856	0.731861	7.47212	7.89133e-14	3.04145e-12
hsa-miR-4492	68.5593	6.51091	100.834	29.7014	33.4378	118.632	0.665438	0.584664	3.56931	1.12394	0.610012	0	59.6127	1.09223	5.57027	0.751333	7.41385	1.22685e-13	4.53935e-12
hsa-miR-378c	22.8531	35.4483	62.0518	66.8281	70.5909	71.1795	5.98894	9.06229	9.51816	2.99716	11.4377	6.12985	54.8253	7.52235	2.8835	0.396184	7.27817	3.38368e-13	1.20381e-11
hsa-miR-33a-5p	22.8531	54.2576	19.3912	64.353	29.7225	0	1.99631	1.75399	0.79318	0	0.610012	1.09462	31.7629	1.04135	4.87111	0.669767	7.27285	3.51983e-13	1.20587e-11
hsa-miR-377-3p	45.7062	191.71	217.181	497.498	109.602	442.895	27.7266	9.64696	1.58636	2.62252	4.27008	10.5083	250.765	9.39347	4.61707	0.636363	7.2554	4.00462e-13	1.32295e-11
hsa-miR-150-5p	159.972	23.1499	89.1995	14.8507	5.57297	0	0.443625	0	0.79318	0.374645	0.457509	0	48.7908	0.344826	6.55916	0.923779	7.10036	1.24433e-12	3.96897e-11
hsa-miR-561-5p	45.7062	125.154	457.632	806.888	193.196	324.262	43.4753	20.7556	3.9659	13.1126	8.54016	9.85155	325.473	16.6168	4.20022	0.609722	6.88874	5.62871e-12	1.73552e-10
hsa-miR-4488	0	5.06404	77.5648	47.0272	24.1495	79.0883	0.887251	0	1.18977	1.87323	0.762515	0	38.8156	0.78546	5.46138	0.806494	6.77176	1.27229e-11	3.79634e-10
hsa-miR-101-3p	251.384	1321.72	1543.54	1623.68	1885.52	956.969	271.055	127.749	38.4692	41.9602	63.8987	112.527	1263.8	109.276	3.47636	0.515136	6.74843	1.49459e-11	4.32029e-10
hsa-miR-486-5p	99593.9	5192.82	36168.4	2670.65	3416.23	3147.72	165.472	412.188	1302	649.26	654.085	358.159	25031.6	590.195	5.18226	0.775995	6.67822	2.41866e-11	6.77958e-10
hsa-miR-3960	2353.87	16.639	112.469	59.4028	96.5981	5583.64	15.5269	2.33866	3.56931	2.99716	8.23516	9.63263	1370.44	7.04997	6.98447	1.05396	6.62687	3.42887e-11	9.32855e-10
hsa-miR-1301-3p	114.266	39.0655	46.5389	61.8779	61.3027	86.9972	147.949	246.144	346.223	343.55	322.086	265.335	68.3413	278.548	-2.19006	0.332132	-6.59395	4.28273e-11	1.13186e-09
hsa-miR-3940-5p	22.8531	4.34061	27.1477	14.8507	9.28828	0	0	0	0	0	0	0	13.0801	0	7.27548	1.108	6.56635	5.15644e-11	1.32492e-09
hsa-miR-374a-3p	0	236.563	240.451	301.964	263.787	189.812	27.283	10.8163	2.77613	2.62252	1.22002	3.28385	205.43	8.00029	4.55151	0.699879	6.50328	7.85856e-11	1.96464e-09
hsa-miR-376a-3p	22.8531	177.242	69.8083	150.982	183.908	118.632	31.7192	19.0016	5.15567	7.86755	9.76019	13.1354	120.571	14.4399	3.08387	0.483702	6.37556	1.8229e-10	4.43732e-09
hsa-let-7f-2-3p	0	72.3435	62.0518	143.557	81.7369	63.2707	13.9742	4.67731	1.58636	0.74929	4.11758	4.15954	70.4933	4.87738	3.82868	0.606411	6.31367	2.72502e-10	6.46318e-09
hsa-miR-144-5p	0	84.6419	34.9041	2.47512	27.8648	0	0	0	0	0	0.305006	0	24.981	0.0508343	7.46679	1.18341	6.30957	2.79813e-10	6.47068e-09
hsa-miR-301a-3p	297.091	2164.52	2005.05	1378.64	2275.63	1708.31	371.758	148.797	33.7101	37.8392	53.8335	69.6176	1638.21	119.259	3.69632	0.58713	6.29557	3.06267e-10	6.90968e-09
hsa-miR-33b-5p	0	23.8734	104.712	44.5521	70.5909	15.8177	5.10169	4.67731	2.77613	0.374645	3.66007	3.7217	43.2577	3.38526	3.69681	0.587915	6.288	3.21583e-10	7.08248e-09
hsa-miR-9901	159.972	13.0218	15.513	7.42535	9.28828	347.989	2.88356	0	1.18977	0.374645	0.152503	1.75139	92.2015	1.05864	5.95968	0.949217	6.27852	3.41817e-10	7.35303e-09
hsa-miR-708-3p	45.7062	215.584	193.912	222.76	250.784	268.9	71.8673	23.0942	13.8806	19.1069	15.7078	16.2003	199.608	26.6429	2.90178	0.463283	6.2635	3.7643e-10	7.91359e-09
hsa-miR-377-5p	502.769	191.71	193.912	287.113	211.773	189.812	555.862	789.004	1121.16	982.319	714.019	1052.8	262.848	869.194	-1.80651	0.289173	-6.24714	4.18038e-10	8.593e-09
hsa-miR-3130-3p	0	7.95778	3.87824	42.077	20.4342	7.90883	0.443625	0.292332	0	0	0	0.218923	13.7093	0.159147	6.09037	0.979018	6.22089	4.94335e-10	9.94043e-09
hsa-miR-4449	45.7062	26.7671	155.13	69.3032	94.7405	31.6353	2.43994	3.21565	7.53521	12.7379	8.84517	9.19478	70.547	7.32811	3.24884	0.526829	6.16677	6.96973e-10	1.3717e-08
hsa-miR-136-3p	1325.48	5748.41	3393.46	4737.37	3046.56	6208.43	1086.22	396.987	74.5589	151.731	135.575	332.326	4076.62	362.899	3.41668	0.562874	6.07005	1.27868e-09	2.46412e-08
hsa-miR-539-3p	68.5593	480.361	302.503	195.534	404.969	245.174	69.6492	20.4632	4.75908	7.11826	7.01513	17.5139	282.85	21.0865	3.67348	0.6068	6.05385	1.41421e-09	2.66968e-08
hsa-miR-10401-3p	22.8531	61.492	50.4171	356.417	91.0252	55.3618	6.43257	10.8163	11.1045	10.4901	15.4028	14.8868	106.261	11.5222	3.21232	0.536868	5.98345	2.18455e-09	4.04142e-08
hsa-miR-1277-5p	0	50.6404	50.4171	54.4525	37.1531	7.90883	4.87988	2.92332	1.58636	0	0.610012	1.97031	33.4287	1.99498	4.07693	0.683354	5.96607	2.43042e-09	4.40811e-08
hsa-miR-29b-3p	68.5593	132.389	298.624	185.634	365.958	221.447	69.4274	24.8482	15.467	8.61684	15.5553	28.46	212.102	27.0625	2.94881	0.498295	5.91779	3.26288e-09	5.80416e-08
hsa-miR-382-3p	22.8531	111.409	31.0259	146.032	117.032	197.721	23.0685	12.2779	1.58636	4.49574	5.3376	8.31909	104.345	9.18087	3.45597	0.586821	5.8893	3.87823e-09	6.76862e-08
hsa-miR-342-5p	137.119	45.5764	42.6606	27.2263	76.1639	110.724	172.127	316.596	385.882	726.437	361.737	343.71	73.2449	384.415	-2.52979	0.43015	-5.88118	4.07344e-09	6.97766e-08
hsa-miR-376c-3p	159.972	595.387	577.857	745.01	622.315	466.621	165.694	72.206	11.1045	29.2223	34.7707	59.5471	527.86	62.0908	3.04371	0.527828	5.76648	8.09465e-09	1.36137e-07
hsa-miR-889-3p	502.769	1033.07	1946.88	2982.51	2355.51	1320.77	572.942	213.987	62.2646	158.475	145.335	160.033	1690.25	218.839	2.90397	0.505131	5.74894	8.98071e-09	1.48342e-07
hsa-miR-299-3p	159.972	516.533	1008.34	1252.41	748.636	553.618	248.208	159.321	101.924	118.013	103.244	143.395	706.585	145.684	2.2744	0.398151	5.71241	1.11386e-08	1.80757e-07
hsa-miR-7705	91.4125	12.2984	0	12.3756	3.71531	39.5442	1.10906	0.292332	0	0.74929	0.152503	0.437847	26.5577	0.456839	5.10409	0.898608	5.68	1.34694e-08	2.14813e-07
hsa-miR-335-5p	662.74	4503.38	3905.39	6868.44	5539.53	6216.34	659.227	746.616	42.0385	49.4531	214.267	359.253	4615.97	345.142	3.63844	0.641304	5.6735	1.39911e-08	2.19352e-07
hsa-miR-5100	114.266	3.61717	7.75648	17.3258	9.28828	237.265	1.55269	3.50798	2.77613	1.12394	1.67753	1.97031	64.9197	2.10143	4.60858	0.813634	5.6642	1.47712e-08	2.27723e-07
hsa-miR-329-5p	91.4125	25.3202	19.3912	9.90046	18.5766	39.5442	95.8231	110.209	165.378	128.129	98.5169	128.946	34.0242	121.167	-2.27717	0.402738	-5.65423	1.56545e-08	2.37383e-07
hsa-miR-1228-3p	0	10.8515	11.6347	22.276	26.0072	7.90883	0.443625	0.876996	0	1.12394	1.83004	0.218923	13.113	0.748919	4.12301	0.739929	5.57217	2.51592e-08	3.75359e-07
hsa-miR-1307-5p	754.153	1140.86	10060.1	5400.7	3871.36	3590.61	686.288	706.859	548.484	86.543	302.566	294.452	4136.3	437.532	3.16952	0.578568	5.47821	4.29642e-08	6.30824e-07
hsa-miR-1197	0	103.451	120.225	131.181	180.193	150.268	51.9042	20.1709	14.6738	22.4787	17.6903	21.2356	114.22	24.6922	2.27208	0.416092	5.46051	4.74772e-08	6.86194e-07
hsa-miR-619-5p	45.7062	33.278	69.8083	183.159	61.3027	110.724	7.098	6.72364	14.6738	27.3491	6.71013	5.25416	83.9962	11.3015	2.8783	0.528168	5.44959	5.04866e-08	7.18463e-07
hsa-miR-3605-3p	45.7062	20.2562	42.6606	4.95023	29.7225	55.3618	114.455	137.981	124.133	221.79	110.26	232.059	33.1096	156.779	-2.41035	0.443768	-5.43154	5.58683e-08	7.83003e-07
hsa-miR-192-5p	388.503	1133.62	2229.99	2034.54	2147.45	1099.33	594.458	334.72	169.74	275.739	288.993	279.565	1505.57	323.869	2.20205	0.406246	5.42047	5.94417e-08	8.2065e-07
hsa-miR-148a-3p	2262.46	7324.78	8055.1	8224.81	13592.5	10510.8	2040.45	1537.67	924.847	1865.36	2283.27	2947.58	8328.41	1933.2	2.08796	0.385605	5.41478	6.13648e-08	8.34742e-07
hsa-miR-370-5p	45.7062	15.9156	11.6347	17.3258	11.1459	15.8177	56.1186	58.7587	73.3691	59.5686	46.9709	78.1556	19.591	62.1569	-1.99002	0.367788	-5.4108	6.27442e-08	8.41136e-07
hsa-miR-654-5p	502.769	307.46	143.495	242.561	221.061	308.444	560.521	838.701	914.536	1190.62	647.07	1172.99	287.632	887.407	-1.68084	0.310973	-5.40512	6.47644e-08	8.55815e-07
hsa-miR-1843	45.7062	41.2358	11.6347	14.8507	48.2991	71.1795	91.8304	158.736	172.12	174.959	140.913	187.179	38.8177	154.29	-2.06236	0.384581	-5.36261	8.20277e-08	1.06867e-06
hsa-miR-331-3p	137.119	46.2998	7.75648	47.0272	27.8648	23.7265	115.343	175.692	208.606	162.221	222.349	183.896	48.2989	178.018	-2.16648	0.406922	-5.32408	1.01466e-07	1.30356e-06
hsa-miR-181b-2-3p	0	16.639	23.2694	71.7783	42.7261	23.7265	4.43625	3.80032	0	3.37181	1.52503	4.15954	29.6899	2.88216	3.39986	0.6403	5.30978	1.09756e-07	1.39075e-06
hsa-miR-548e-3p	0	25.3202	54.2953	168.308	55.7297	47.453	13.7524	2.33866	0.39659	1.49858	2.59255	2.846	58.5177	3.90413	3.82377	0.723185	5.2874	1.24066e-07	1.55083e-06
hsa-miR-128-1-5p	91.4125	31.1077	23.2694	29.7014	26.0072	39.5442	69.2055	131.549	196.709	123.633	107.82	156.092	40.1737	130.835	-1.98646	0.377477	-5.26248	1.42128e-07	1.72984e-06
hsa-miR-146a-3p	0	30.3843	34.9041	245.036	5.57297	63.2707	1.7745	8.47763	1.18977	1.12394	0.152503	1.53246	63.1947	2.37513	4.54581	0.863461	5.26464	1.40463e-07	1.72984e-06
hsa-miR-142-3p	0	37.6186	96.956	0	0	15.8177	0	0.292332	0	0.374645	0.305006	0.65677	25.0654	0.271459	5.94084	1.13016	5.25664	1.46712e-07	1.76245e-06
hsa-miR-660-5p	205.678	742.244	329.65	589.077	702.194	268.9	124.215	153.767	19.0363	60.3179	92.2643	72.6825	472.957	87.0471	2.42872	0.462425	5.25213	1.5035e-07	1.783e-06
hsa-miR-127-5p	319.944	617.09	969.56	1373.69	460.699	1075.6	314.309	234.45	164.585	179.08	161.653	283.944	802.764	223.003	1.84538	0.355043	5.19764	2.01838e-07	2.3633e-06
hsa-miR-125b-5p	40198.6	17074.5	13558.3	11729.6	17441.5	15841.4	42978.4	53169.1	65262.4	66554.9	59278.7	69863.5	19307.3	59517.8	-1.6156	0.311066	-5.19373	2.06119e-07	2.38326e-06
hsa-miR-30c-2-3p	319.944	132.389	104.712	168.308	170.904	126.541	278.153	496.672	726.553	506.145	383.087	519.505	170.466	485.019	-1.5997	0.308535	-5.18484	2.16201e-07	2.46896e-06
hsa-miR-10396b-3p	0	8.68122	31.0259	22.276	9.28828	7.90883	1.55269	0.876996	0.79318	0.374645	2.44005	1.53246	13.1967	1.26167	3.36361	0.651548	5.16249	2.4368e-07	2.74883e-06
hsa-miR-10400-5p	319.944	0.723435	23.2694	0	7.43063	355.897	0	0	0	0	0	0	117.877	0	8.44055	1.6527	5.10713	3.27095e-07	3.64533e-06
hsa-miR-5585-3p	0	16.639	42.6606	12.3756	16.7189	31.6353	2.43994	0.584664	5.55226	1.12394	2.13504	0.65677	20.0049	2.0821	3.27984	0.642735	5.10294	3.34426e-07	3.68266e-06
hsa-miR-29a-5p	182.825	106.345	54.2953	69.3032	39.0108	102.815	30.6101	18.4169	9.51816	4.87039	18.6054	13.5732	92.4323	15.9324	2.37447	0.466336	5.09176	3.54762e-07	3.86065e-06
hsa-miR-339-5p	91.4125	290.097	523.562	938.069	440.265	458.712	119.335	104.947	149.118	64.8136	143.048	102.456	457.02	113.953	2.01207	0.395961	5.08149	3.74485e-07	4.02789e-06
hsa-miR-582-3p	0	32.5546	42.6606	126.231	42.7261	94.906	21.294	6.4313	4.75908	7.86755	7.62515	5.91093	56.513	8.98134	2.6756	0.529297	5.055	4.30381e-07	4.57589e-06
hsa-miR-744-5p	6741.67	3823.35	3191.79	2183.05	2948.1	3891.15	5723.65	11258.3	15885	11657.1	11127.8	12645.4	3796.52	11382.9	-1.58063	0.313092	-5.04846	4.45376e-07	4.68151e-06
hsa-miR-455-5p	45.7062	345.802	581.736	876.191	403.111	292.627	132.2	105.824	23.7954	50.2024	35.2282	64.8013	424.195	68.6753	2.60219	0.521373	4.99102	6.00606e-07	6.24225e-06
hsa-miR-2114-3p	0	8.68122	15.513	29.7014	16.7189	23.7265	2.66175	2.63099	1.58636	1.12394	3.50757	3.28385	15.7235	2.46574	2.68252	0.538361	4.98276	6.26851e-07	6.44264e-06
hsa-miR-485-5p	1371.19	693.774	605.005	1081.63	624.173	727.613	1336.64	1868.29	3156.06	3008.03	1929.01	3144.83	850.563	2407.14	-1.51309	0.305907	-4.94626	7.56533e-07	7.69003e-06
hsa-miR-29b-1-5p	0	3.61717	3.87824	0	5.57297	7.90883	18.8541	25.4329	60.2817	23.6026	38.8882	32.8385	3.4962	33.3163	-3.06127	0.619927	-4.93812	7.88789e-07	7.93076e-06
hsa-miR-941	2148.19	1325.33	764.013	831.639	1127.6	767.157	2276.02	3684.55	4196.71	3701.49	2830.15	2551.99	1160.66	3206.82	-1.47852	0.299686	-4.93357	8.07391e-07	8.0305e-06
hsa-miR-301b-3p	68.5593	513.639	500.293	321.765	629.746	332.171	179.89	56.7124	18.2431	33.7181	37.5157	38.9684	394.362	60.8413	2.66467	0.542017	4.91621	8.82342e-07	8.68262e-06
hsa-miR-125a-5p	30577.5	8125.62	8481.71	9083.67	8976.2	12836	30225.7	39095.9	46407.7	59089.4	41205.8	53043.8	13013.5	44844.7	-1.77213	0.361188	-4.9064	9.27613e-07	8.93794e-06
hsa-miR-376a-5p	159.972	255.373	252.085	227.711	228.492	260.991	125.768	72.4983	38.0726	54.6982	46.2084	108.586	230.771	74.3052	1.64445	0.335041	4.9082	9.19172e-07	8.93794e-06
hsa-miR-181d-5p	662.74	375.463	283.111	356.417	282.364	434.986	604.218	941.017	1211.58	878.917	797.743	1051.93	399.18	914.234	-1.25421	0.259677	-4.82988	1.36612e-06	1.30275e-05
hsa-miR-1296-5p	754.153	347.249	294.746	277.213	375.247	197.721	711.575	1031.35	1608.96	854.94	993.252	990.409	374.388	1031.75	-1.51515	0.313862	-4.82744	1.38299e-06	1.30537e-05
hsa-miR-432-5p	1851.1	1211.03	779.526	900.942	1465.69	1004.42	1710.18	2795.28	3573.67	3553.88	2728.43	3805.76	1202.12	3027.87	-1.34062	0.279054	-4.80418	1.55389e-06	1.45187e-05
hsa-miR-223-3p	0	81.7481	259.842	143.557	14.8613	0	0	0	0	1.49858	0	0.437847	83.3347	0.322738	6.74352	1.40432	4.80199	1.57099e-06	1.45316e-05
hsa-miR-374b-3p	0	10.1281	19.3912	64.353	31.5802	55.3618	5.98894	6.72364	0.39659	2.99716	1.83004	1.53246	30.1357	3.2448	3.18686	0.6667	4.78004	1.75257e-06	1.58934e-05
hsa-miR-92b-3p	9164.1	3963.7	3090.96	3457.74	6698.71	3329.62	10014.4	13084.5	17116.8	14756.1	14398.4	13233.7	4950.8	13767.3	-1.47144	0.307788	-4.78068	1.74704e-06	1.58934e-05
hsa-let-7f-1-3p	22.8531	18.8093	15.513	49.5023	61.3027	0	7.98526	3.50798	1.18977	1.49858	3.66007	3.28385	27.9967	3.52092	2.98724	0.632692	4.72148	2.34134e-06	2.10266e-05
hsa-miR-215-5p	22.8531	59.3217	162.886	118.806	74.3063	23.7265	27.0611	9.64696	0.79318	3.74645	3.50757	4.81631	76.9832	8.26194	3.167	0.67669	4.68013	2.86693e-06	2.54991e-05
hsa-miR-450b-5p	159.972	688.71	558.466	292.064	973.412	672.251	216.711	95.0079	11.8977	12.7379	38.1257	29.9925	557.479	67.4121	2.97217	0.638425	4.65548	3.23224e-06	2.84745e-05
hsa-miR-30d-3p	68.5593	81.0247	46.5389	123.756	52.0144	110.724	41.7008	21.3402	10.3113	16.4844	19.5204	22.3302	80.4361	21.9479	1.85034	0.400072	4.62502	3.74561e-06	3.26857e-05
hsa-miR-15b-5p	525.622	223.541	321.894	143.557	523.859	276.809	773.239	801.282	1180.65	984.193	1014.6	730.547	335.88	914.085	-1.47341	0.322601	-4.5673	4.94045e-06	4.27095e-05
hsa-miR-361-5p	342.797	282.14	217.181	99.0046	302.798	166.085	496.86	664.471	490.582	590.066	591.711	561.757	235.001	565.908	-1.29414	0.284561	-4.54787	5.41924e-06	4.64148e-05
hsa-miR-4466	22.8531	25.3202	38.7824	32.1765	20.4342	47.453	3.10538	4.09265	3.56931	8.24219	11.5902	9.4137	31.1699	6.66891	2.14769	0.472472	4.54565	5.47672e-06	4.64767e-05
hsa-miR-92a-3p	46391.8	22254.3	23537	22355.2	30649.5	19258	37022.7	64781.9	91121.7	70842	65479.1	67833	27407.6	66180.1	-1.26598	0.283739	-4.46177	8.12854e-06	6.83536e-05
hsa-let-7e-5p	35148.1	8386.06	4851.68	3059.24	9403.46	11127.7	27800.9	50119.7	69696.7	73212.8	48224.5	74149.6	11996	57200.7	-2.21804	0.498728	-4.4474	8.6917e-06	7.24308e-05
hsa-miR-181b-5p	45797.6	29728.8	23882.2	23367.6	26614.6	31643.2	40884.1	54118.8	69566.2	73469	64358.8	84744.1	30172.4	64523.5	-1.09317	0.245943	-4.44483	8.79625e-06	7.26476e-05
hsa-miR-493-5p	2468.14	1375.25	1178.98	1210.33	2022.99	1558.04	3920.09	2905.49	3344.05	2996.41	2777.99	3886.11	1635.62	3305.02	-1.02795	0.231402	-4.44226	8.90171e-06	7.28679e-05
hsa-let-7d-3p	1508.31	702.455	426.606	754.91	757.924	640.615	1001.26	2284.87	3046.6	2428.82	2183.84	2090.94	798.469	2172.72	-1.46194	0.32988	-4.43175	9.34731e-06	7.45446e-05
hsa-miR-196b-5p	1554.01	808.077	639.909	465.322	1110.88	735.521	2080.16	2282.53	2303.39	1908.07	1937.7	1733	885.62	2040.81	-1.22799	0.276957	-4.43388	9.25531e-06	7.45446e-05
hsa-miR-656-3p	45.7062	149.751	46.5389	19.8009	243.353	63.2707	30.1665	13.4473	0.79318	6.36897	7.77765	9.4137	94.7368	11.3279	3.00861	0.678879	4.43172	9.3483e-06	7.45446e-05
hsa-miR-1252-5p	0	1.44687	19.3912	0	16.7189	23.7265	0.665438	0	0	0	0	0.437847	10.2139	0.183881	5.14711	1.16227	4.42851	9.4888e-06	7.50183e-05
hsa-miR-433-3p	457.062	274.182	209.425	188.109	289.794	237.265	349.355	611.266	738.847	726.062	531.168	844.825	275.973	633.587	-1.25366	0.283427	-4.42323	9.72356e-06	7.62228e-05
hsa-miR-380-3p	22.8531	82.4716	127.982	353.941	150.47	23.7265	49.0206	13.1549	4.75908	18.7323	15.7078	13.7922	126.907	19.1945	2.70768	0.615065	4.40228	1.07121e-05	8.32666e-05
hsa-miR-181b-3p	45.7062	23.8734	58.1736	200.484	46.4414	118.632	30.832	9.93929	0.79318	6.36897	5.79511	4.15954	82.2186	9.64801	3.00203	0.682253	4.40017	1.08168e-05	8.33794e-05
hsa-miR-30c-1-3p	68.5593	36.1717	46.5389	94.0544	48.2991	39.5442	91.6086	161.66	169.344	146.486	138.778	149.306	55.5279	142.864	-1.39121	0.3167	-4.39284	1.11879e-05	8.55275e-05
hsa-miR-3909	137.119	144.687	104.712	61.8779	156.043	205.63	251.757	275.377	375.571	339.803	287.468	476.815	135.011	334.465	-1.32791	0.304609	-4.35939	1.30424e-05	9.88871e-05
hsa-miR-665	0	260.437	1698.67	249.987	79.8792	39.5442	17.745	23.0942	87.6463	6.74361	10.6752	12.0408	388.086	26.3242	3.69679	0.856287	4.31724	1.57993e-05	0.000118816
hsa-miR-455-3p	0	28.9374	38.7824	27.2263	22.2919	15.8177	45.9152	89.4536	92.802	94.4106	61.0012	80.5638	22.1759	77.3577	-1.54988	0.360317	-4.30143	1.69701e-05	0.000126592
hsa-let-7d-5p	7130.17	3421.12	1469.85	967.77	2788.34	2870.91	7897.2	10837.6	12800.3	9919.48	11282.2	9385.46	3108.03	10353.7	-1.72537	0.401803	-4.29408	1.75422e-05	0.000129812
hsa-miR-2355-5p	45.7062	46.2998	62.0518	24.7512	37.1531	47.453	15.7487	13.7396	0.79318	8.99148	5.79511	5.91093	43.9025	8.4965	2.2993	0.536195	4.28817	1.80151e-05	0.000132254
hsa-miR-877-5p	1988.22	1570.58	1054.88	1027.17	1619.88	1036.06	1472.39	3131.75	4593.3	3447.48	3646.19	3698.71	1382.8	3331.64	-1.26958	0.296545	-4.28124	1.85854e-05	0.000135366
hsa-miR-7975	0	0	15.513	4.95023	5.57297	7.90883	0	0	0	0	0	0	5.6575	0	5.97552	1.39715	4.27693	1.8949e-05	0.000136936
hsa-let-7a-5p	55875.9	18852.7	9513.32	5940.28	20698	24446.2	62881.4	95962.7	94253.1	91057.9	74946.8	81624.7	22554.4	83454.4	-1.86471	0.436866	-4.26837	1.96903e-05	0.000140104
hsa-miR-345-3p	0	2.89374	31.0259	9.90046	0	0	0	0	0	0.374645	0	0	7.30335	0.0624408	5.89238	1.38003	4.26977	1.95679e-05	0.000140104
hsa-miR-190a-5p	68.5593	14.4687	7.75648	19.8009	35.2955	31.6353	8.20707	0.292332	0	0.374645	1.67753	1.97031	29.586	2.08698	3.45375	0.811758	4.25465	2.09376e-05	0.000147842
hsa-miR-4448	594.181	61.492	267.598	143.557	180.193	1431.5	23.0685	39.4648	90.4225	86.1684	102.177	66.5527	446.42	67.9756	2.62687	0.618213	4.24913	2.14605e-05	0.000150386
hsa-miR-369-3p	68.5593	366.058	96.956	61.8779	377.104	379.624	88.2814	34.4952	6.74203	24.3519	26.993	51.0091	225.03	38.6455	2.50252	0.58953	4.24493	2.18661e-05	0.000152076
hsa-miR-1262	22.8531	2.1703	0	4.95023	5.57297	15.8177	19.7413	27.4792	28.5545	31.0955	25.468	37.4359	8.56071	28.2957	-2.49251	0.589747	-4.2264	2.37463e-05	0.00016392
hsa-miR-30d-5p	21756.2	12064	4374.65	3465.16	8277.72	9530.14	24625	31825.6	37556.3	30338.4	28585.8	37520.6	9911.31	31741.9	-1.66432	0.394087	-4.22323	2.40825e-05	0.000164214
hsa-miR-493-3p	2628.11	1933.74	1648.25	1685.55	2702.89	2182.84	3379.54	3408.59	4081.31	3621.32	3401.58	4866.01	2130.23	3793.06	-0.838187	0.198498	-4.22266	2.41439e-05	0.000164214
hsa-miR-590-3p	22.8531	44.1295	0	14.8507	46.4414	31.6353	5.10169	0.876996	0	0	0.762515	0	26.6517	1.12353	4.23397	1.00553	4.2107	2.54584e-05	0.000171891
hsa-miR-409-3p	9872.55	7690.84	3967.44	5628.41	6997.79	6105.62	11139.4	13691.1	13714.5	23606.8	11816.5	14934.3	6710.44	14817.1	-1.13987	0.27175	-4.19455	2.73412e-05	0.000183265
hsa-miR-652-5p	0	1.44687	11.6347	7.42535	9.28828	7.90883	0.887251	0.292332	0	0	0	0	6.28401	0.196597	4.60462	1.10195	4.17862	2.93288e-05	0.000195174
hsa-miR-1180-3p	571.328	309.63	240.451	391.068	243.353	466.621	513.496	594.603	1096.17	963.587	962.599	905.686	370.409	839.358	-1.22527	0.293521	-4.1744	2.98772e-05	0.000197127
hsa-miR-31-3p	0	15.9156	0	138.606	55.7297	23.7265	9.98157	1.46166	1.98295	1.12394	3.35506	3.28385	38.9964	3.5315	3.39047	0.812458	4.1731	3.00486e-05	0.000197127
hsa-miR-127-3p	91801	83530	82404.8	101128	49447.1	109474	123468	155152	185746	215022	145333	241164	86297.5	177648	-1.03742	0.250023	-4.14931	3.33486e-05	0.000217236
hsa-miR-196b-3p	22.8531	8.68122	0	32.1765	35.2955	31.6353	5.54532	5.26198	3.17272	3.37181	3.50757	2.62708	21.7736	3.91441	2.37461	0.574001	4.13694	3.51965e-05	0.00022767
hsa-miR-181a-2-3p	5918.96	2720.12	1085.91	1232.61	1879.95	2602.01	6214.97	8058.72	8394.62	8695.51	5952.04	8713.81	2573.26	7671.61	-1.57173	0.380707	-4.12845	3.65212e-05	0.000234598
hsa-miR-137-3p	0	131.665	159.008	155.932	206.2	173.994	63.882	23.0942	2.77613	4.49574	7.62515	9.63263	137.8	18.5843	2.83213	0.68698	4.12258	3.74646e-05	0.000238999
hsa-miR-134-5p	1782.54	1259.5	566.223	712.833	800.65	885.789	1493.46	2102.74	2875.28	2673.84	2185.98	2597.53	1001.26	2321.47	-1.22957	0.299135	-4.11042	3.94936e-05	0.000250216
hsa-miR-186-5p	12112.2	19898.1	25844.6	27803	19548.1	29855.8	14503.7	12521.2	7496.74	8963.01	8650.12	10792.9	22510.3	10487.9	1.09737	0.267396	4.1039	4.06243e-05	0.000255629
hsa-miR-22-5p	137.119	237.287	143.495	64.353	78.0216	102.815	50.1297	58.7587	31.3306	41.9602	43.3108	53.1984	127.182	46.4481	1.45361	0.354478	4.10071	4.1189e-05	0.000257431
hsa-miR-1185-1-3p	662.74	379.08	135.738	252.462	133.751	126.541	733.756	683.472	713.862	1130.3	740.859	918.821	281.719	820.179	-1.5974	0.392993	-4.0647	4.8094e-05	0.00029857
hsa-miR-627-3p	22.8531	1.44687	46.5389	2.47512	0	31.6353	1.33088	0.584664	0	1.12394	1.52503	0.65677	17.4915	0.870212	3.86792	0.955497	4.04808	5.164e-05	0.000318447
hsa-miR-199b-5p	434.209	944.083	965.681	2284.53	1025.43	909.516	522.147	282.393	89.2327	508.019	226.314	213.888	1093.91	306.999	1.81758	0.449399	4.04448	5.24395e-05	0.000321235
hsa-miR-222-3p	86750.4	62206.7	30843.6	45215.4	36794.6	45325.5	142721	126332	104658	88556.7	101293	98965.2	51189.4	110421	-1.1041	0.27489	-4.01652	5.90644e-05	0.000359438
hsa-miR-106b-3p	617.034	394.272	302.503	324.24	356.67	514.074	399.706	846.594	1417.81	1142.67	1051.36	1018.65	418.132	979.464	-1.25559	0.313705	-4.00245	6.26888e-05	0.000379001
hsa-miR-99b-5p	26509.6	15694.9	12891.3	23038.4	19447.8	18538.3	35088.8	29525.5	46044.1	61665.8	29758.4	36970	19353.4	39842.1	-1.03793	0.260423	-3.98554	6.73261e-05	0.000404394
hsa-miR-30b-5p	251.384	931.784	639.909	363.842	860.095	482.439	381.74	199.078	111.442	175.709	171.718	237.532	588.242	212.87	1.47673	0.373383	3.95501	7.65324e-05	0.000456725
hsa-let-7i-5p	99319.6	43704.2	16564	9687.6	22535.2	39488.8	135288	140077	146938	112340	120084	158809	38549.9	135589	-1.79011	0.454353	-3.93991	8.15135e-05	0.000483333
hsa-miR-151b	11083.8	8431.63	5049.47	5650.69	8348.31	9593.41	14919.3	13394.4	14087.7	16217.6	14071.4	14798.3	8026.21	14581.5	-0.86201	0.219748	-3.92272	8.75566e-05	0.000511631
hsa-miR-2467-5p	0	14.4687	7.75648	22.276	39.0108	23.7265	7.31982	2.33866	2.77613	2.99716	3.81257	6.78662	17.8731	4.33849	2.16186	0.551263	3.92165	8.79452e-05	0.000511631
hsa-miR-7706	479.915	279.969	283.111	207.91	308.371	189.812	357.562	583.495	889.948	509.892	600.557	812.643	291.515	625.683	-1.1461	0.292123	-3.92335	8.7327e-05	0.000511631
hsa-miR-151a-5p	11152.3	8446.83	5053.34	5700.19	8370.6	9609.23	14950.8	13427.1	14122.2	16255.1	14104.7	14816.9	8055.42	14612.8	-0.859888	0.219727	-3.91344	9.09912e-05	0.000526043
hsa-miR-431-5p	822.712	633.006	380.067	475.222	503.425	450.803	1074.24	772.634	778.506	1283.53	1006.67	1084.98	544.206	1000.09	-0.909464	0.232693	-3.90843	9.28966e-05	0.000533723
hsa-miR-7977	22.8531	50.6404	244.329	1405.87	230.349	86.9972	26.3957	62.8514	102.32	12.3633	31.7206	18.8274	340.172	42.4131	2.90532	0.751352	3.86679	0.000110277	0.000629669
hsa-miR-1305	22.8531	17.3624	0	4.95023	27.8648	15.8177	1.55269	2.63099	0	0	0.610012	2.40816	14.808	1.20031	3.35701	0.86942	3.8612	0.00011283	0.000637556
hsa-miR-939-3p	0	3.61717	0	12.3756	14.8613	0	0	0.292332	0	0	0	0.437847	5.14233	0.121696	4.92135	1.27471	3.86076	0.000113037	0.000637556
hsa-miR-4521	22.8531	1.44687	3.87824	4.95023	1.85766	7.90883	51.6823	36.8338	36.8829	11.614	43.1583	8.10016	7.14916	31.3786	-2.87085	0.744413	-3.85653	0.000115007	0.000644735
hsa-miR-130b-5p	22.8531	74.5138	15.513	17.3258	42.7261	15.8177	167.025	95.3002	150.704	139.743	103.702	68.7419	31.4582	120.869	-1.74337	0.458112	-3.80556	0.000141484	0.000788392
hsa-miR-106b-5p	68.5593	288.651	127.982	106.43	239.638	173.994	109.575	68.4057	51.5567	70.0586	71.9814	50.7902	167.542	70.3947	1.31409	0.348862	3.7668	0.000165351	0.000910412
hsa-miR-27a-3p	3359.41	8484.45	3622.27	2126.12	3984.67	4357.77	2575.47	2218.22	1606.98	1399.3	1517.4	1762.99	4322.45	1846.73	1.22059	0.323917	3.76823	0.000164408	0.000910412
hsa-miR-503-3p	0	6.51091	0	0	0	0	12.4215	20.7556	72.1793	11.614	50.326	16.4192	1.08515	30.6193	-3.48832	0.927909	-3.75934	0.000170365	0.000932471
hsa-miR-424-5p	479.915	1183.54	562.345	240.086	1694.18	743.43	425.88	249.944	84.4736	58.8193	248.885	197.688	817.25	210.948	1.92616	0.515609	3.73571	0.000187189	0.00101853
hsa-miR-3155a	0	1.44687	19.3912	12.3756	0	0	0	0	0.39659	0.374645	0	0.218923	5.53561	0.165026	4.73541	1.26908	3.73138	0.000190435	0.00102414
hsa-miR-3155b	0	1.44687	19.3912	12.3756	0	0	0	0	0.39659	0.374645	0	0.218923	5.53561	0.165026	4.73541	1.26908	3.73138	0.000190435	0.00102414
hsa-miR-491-5p	0	0	0	0	0	0	6.65438	6.4313	7.53521	8.99148	6.40512	10.0705	0	7.68133	-3.3109	0.891958	-3.71195	0.000205671	0.00109969
hsa-miR-664a-5p	22.8531	0	3.87824	0	1.85766	0	10.4252	16.3706	15.0704	14.9858	17.5378	30.4303	4.76484	17.47	-3.13451	0.845056	-3.70924	0.000207886	0.00110514
hsa-miR-125a-3p	159.972	112.856	65.93	242.561	117.032	102.815	211.831	261.345	341.464	612.545	314.614	303.209	133.528	340.834	-1.34893	0.364977	-3.69595	0.00021907	0.00115794
hsa-miR-155-5p	4822.01	2289.67	1865.43	3408.23	2894.23	1842.76	4417.4	7113.32	6926.84	8646.06	7834.99	3552.91	2853.72	6415.25	-1.1675	0.316453	-3.68933	0.000224842	0.0011817
hsa-let-7b-5p	4707.74	1064.9	923.021	737.584	1515.85	2269.83	1612.36	6692.94	10971.3	6661.19	7409.96	6444.66	1869.82	6632.06	-1.80838	0.49037	-3.68778	0.000226219	0.00118222
hsa-miR-744-3p	0	28.9374	100.834	61.8779	16.7189	39.5442	21.0722	12.2779	8.72498	5.99432	11.1327	12.6976	41.3188	11.9833	1.8508	0.503731	3.67417	0.000238621	0.00124003
hsa-miR-221-5p	1211.22	643.134	275.355	346.516	501.567	442.895	1750.1	1367.24	1158.44	1007.8	1244.58	1206.27	570.114	1289.07	-1.21579	0.332137	-3.66051	0.000251716	0.00129457
hsa-miR-2682-5p	182.825	297.332	209.425	319.29	182.05	371.715	184.548	142.658	42.0385	81.298	80.8266	78.1556	260.439	101.587	1.35735	0.370829	3.6603	0.000251917	0.00129457
hsa-miR-598-3p	45.7062	83.195	151.251	84.1539	44.5838	134.45	56.5622	38.5878	24.192	12.3633	21.9604	30.2114	90.5567	30.6462	1.56258	0.427503	3.65514	0.000257044	0.00131362
hsa-miR-625-5p	114.266	83.195	11.6347	29.7014	118.89	47.453	133.975	213.11	192.743	201.559	190.171	220.675	67.5233	192.039	-1.5412	0.422189	-3.65051	0.00026172	0.00133017
hsa-miR-1228-5p	22.8531	3.61717	0	19.8009	0	0	0	0	0	0	0	0.437847	7.71187	0.0729744	5.08874	1.39662	3.64361	0.000268836	0.00135887
hsa-miR-186-3p	0	13.7453	15.513	0	11.1459	0	1.33088	0.292332	0	0.374645	0	0.218923	6.73403	0.369463	4.0319	1.1129	3.62287	0.000291347	0.00146465
hsa-miR-181a-5p	243431	141141	134393	113454	107399	221724	195494	316571	385998	362683	281185	585038	160257	354495	-1.13799	0.314993	-3.61275	0.000302966	0.00151483
hsa-miR-4785	22.8531	5.06404	3.87824	42.077	13.0036	7.90883	2.88356	2.92332	2.37954	2.99716	4.11758	3.50277	15.7975	3.13399	2.20505	0.611198	3.60776	0.000308855	0.00153597
hsa-let-7c-5p	1919.66	489.765	356.798	185.634	782.073	917.425	577.157	2763.12	3823.92	4130.84	2508.98	3502.55	775.226	2884.43	-1.88266	0.524967	-3.58625	0.000335468	0.00164607
hsa-miR-149-5p	1462.6	1125.66	988.951	1061.82	1090.44	624.798	1531.84	1775.62	2597.66	1488.46	1778.34	2135.82	1059.05	1884.62	-0.840269	0.234347	-3.58558	0.000336332	0.00164607
hsa-miR-374a-5p	22.8531	81.7481	127.982	22.276	178.335	15.8177	43.2535	12.5703	4.36249	5.99432	5.0326	11.6029	74.8353	13.8027	2.42447	0.676051	3.58622	0.000335505	0.00164607
hsa-miR-20a-5p	91.4125	170.731	135.738	101.48	215.488	118.632	98.7066	74.5447	58.6953	36.3406	66.4913	40.5008	138.914	62.5465	1.19863	0.335491	3.57277	0.00035322	0.00171245
hsa-miR-548f-3p	0	0.723435	0	2.47512	9.28828	7.90883	0.221813	0	0	0	0	0	3.39928	0.0369688	4.95069	1.38578	3.57249	0.000353598	0.00171245
hsa-miR-544a	0	7.23435	0	0	7.43063	7.90883	0.221813	0	0	0	0	0	3.7623	0.0369688	5.08656	1.42463	3.57043	0.000356393	0.001717
hsa-miR-2116-3p	22.8531	5.78748	0	0	0	0	12.6433	13.7396	15.0704	16.1097	15.8603	18.6085	4.77343	15.3386	-2.31462	0.65338	-3.54253	0.000396308	0.0018994
hsa-miR-148b-3p	1828.25	1411.42	1113.05	928.168	1222.34	1328.68	3020.64	1908.34	2516.36	1921.93	1868.16	2000.3	1305.32	2205.96	-0.772714	0.218871	-3.53046	0.000414843	0.00197799
hsa-miR-548h-5p	0	11.575	15.513	47.0272	29.7225	23.7265	10.4252	4.09265	1.18977	1.12394	6.71013	4.15954	21.2607	4.61687	2.25529	0.641971	3.51308	0.000442952	0.00210118
hsa-miR-6735-5p	0	6.51091	3.87824	12.3756	9.28828	7.90883	15.3051	28.3562	38.0726	20.6055	25.9255	30.4303	6.66031	26.4492	-1.72862	0.492714	-3.50837	0.000450861	0.00212779
hsa-miR-410-5p	0	0.723435	3.87824	0	1.85766	0	8.42888	12.5703	9.91475	10.4901	8.69267	8.75693	1.07655	9.80893	-2.62078	0.752738	-3.48166	0.000498311	0.00233979
hsa-miR-937-3p	45.7062	24.5968	23.2694	29.7014	22.2919	23.7265	34.8246	91.4999	65.8339	70.0586	59.4761	50.3524	28.2154	62.0076	-1.25788	0.362404	-3.47093	0.000518655	0.00242301
hsa-miR-652-3p	45.7062	57.8748	19.3912	9.90046	11.1459	39.5442	60.9985	78.0526	111.442	133.374	78.0815	77.4989	30.5938	89.9078	-1.60004	0.461287	-3.46865	0.000523075	0.00243138
hsa-miR-4508	228.531	7.95778	93.0777	0	13.0036	166.085	1.33088	8.76996	19.4329	0	0.457509	0.65677	84.776	5.108	3.67203	1.06031	3.46316	0.000533873	0.00246916
hsa-miR-378a-3p	891.272	1390.44	2532.49	2195.43	2526.41	1399.86	523.7	907.983	966.886	703.583	1312.14	714.128	1822.65	854.736	1.09442	0.316383	3.45915	0.00054189	0.00249377
hsa-miR-4775	22.8531	74.5138	69.8083	37.1267	178.335	39.5442	36.8209	29.2332	5.94885	5.24503	15.8603	18.1706	70.3635	18.5465	1.96124	0.567808	3.45406	0.000552211	0.00251623
hsa-miR-887-3p	251.384	266.224	325.772	386.118	172.762	276.809	397.488	497.549	543.725	453.695	470.319	587.809	279.845	491.764	-0.803446	0.232527	-3.45528	0.000549715	0.00251623
hsa-miR-487a-5p	0	0.723435	0	0	1.85766	7.90883	5.76713	12.2779	8.32839	14.2365	12.2002	10.0705	1.74832	10.4801	-2.68682	0.7818	-3.43672	0.000588813	0.00266986
hsa-miR-3135b	22.8531	0.723435	0	0	1.85766	79.0883	0	0	0	0	0	0	17.4204	0	6.0331	1.75935	3.42915	0.000605464	0.00273197
hsa-miR-1291	22.8531	14.4687	0	14.8507	1.85766	7.90883	0.443625	2.04632	0.39659	1.49858	1.22002	2.40816	10.3232	1.33555	2.64628	0.772566	3.42531	0.000614106	0.00275752
hsa-miR-2110	0	18.8093	15.513	0	0	7.90883	23.0685	44.1421	70.9896	34.4673	43.9208	41.1576	7.03852	42.9577	-2.27409	0.667165	-3.40859	0.000653007	0.00291802
hsa-miR-365a-5p	22.8531	8.68122	3.87824	0	3.71531	0	9.31613	25.4329	36.8829	17.2337	21.3504	28.2411	6.52131	23.0762	-2.13689	0.630043	-3.39165	0.000694733	0.00308956
hsa-miR-668-3p	159.972	130.942	65.93	79.2037	100.313	118.632	147.062	232.989	184.018	250.263	173.091	489.731	109.166	246.192	-1.22071	0.361246	-3.37916	0.000727089	0.00320265
hsa-miR-6820-5p	0	0	0	4.95023	0	0	3.99263	12.5703	14.2772	11.614	11.5902	10.0705	0.825038	10.6858	-2.88686	0.854231	-3.37949	0.000726214	0.00320265
hsa-miR-212-5p	0	13.7453	3.87824	0	14.8613	15.8177	27.283	26.0175	28.9511	65.1882	24.7055	43.5657	8.0504	35.9518	-1.88684	0.562832	-3.35241	0.000801121	0.00351203
hsa-miR-103a-3p	11677.9	8080.04	4940.88	3465.16	9186.11	6777.87	11513.9	15834.2	15342.5	13685.8	13213.8	16351.2	7354.67	14323.5	-0.959285	0.286948	-3.34306	0.0008286	0.00361535
hsa-miR-7-1-3p	0	14.4687	19.3912	42.077	7.43063	15.8177	9.09432	2.33866	0.79318	0.374645	3.50757	1.97031	16.5309	3.01311	2.47376	0.740316	3.3415	0.000833277	0.00361869
hsa-miR-616-5p	22.8531	18.8093	31.0259	0	22.2919	0	3.77081	4.38498	1.58636	4.1211	3.96508	3.50277	15.83	3.55518	2.09294	0.628703	3.32898	0.000871641	0.00376761
hsa-miR-3195	45.7062	1.44687	7.75648	0	0	0	0	0	0.39659	0	0	0	9.1516	0.0660983	4.82895	1.45481	3.31931	0.00090241	0.00388246
hsa-miR-17-3p	68.5593	123.707	209.425	103.955	124.463	213.538	79.6307	85.9456	88.4395	46.0813	70.7614	72.6825	140.608	73.9235	0.948677	0.286353	3.31296	0.000923149	0.0039533
hsa-miR-654-3p	4776.3	7897.02	15544	26206.5	12487.2	7616.21	8265.85	4476.77	3392.03	5609.56	3961.11	4210.77	12421.2	4986.02	1.3042	0.396682	3.28778	0.0010098	0.00430446
hsa-miR-10526-3p	0	0	31.0259	0	3.71531	0	0	0.292332	0	0	0	0.218923	5.7902	0.0852092	4.92082	1.49969	3.28124	0.00103353	0.00436539
hsa-miR-196a-5p	2582.4	855.824	806.674	811.838	1593.87	1826.94	5026.72	1989.32	1707.72	3931.15	3085.29	4560.39	1412.92	3383.43	-1.26132	0.384353	-3.28168	0.00103192	0.00436539
hsa-miR-132-5p	45.7062	28.9374	27.1477	12.3756	18.5766	7.90883	49.2424	44.4345	35.6931	70.4333	43.4633	65.8959	23.442	51.5271	-1.23043	0.376273	-3.27005	0.00107527	0.00452104
hsa-miR-190a-3p	0	0	0	12.3756	18.5766	0	0.221813	0	0	0	0.305006	0	5.15869	0.0878031	4.81961	1.47597	3.26539	0.00109315	0.00457541
hsa-miR-548av-5p	205.678	80.3013	131.86	71.7783	102.171	166.085	84.067	48.5271	22.209	44.2081	63.2887	37.217	126.312	49.9195	1.21876	0.377984	3.22437	0.00126251	0.00523688
hsa-miR-548k	205.678	80.3013	131.86	71.7783	102.171	166.085	84.067	48.5271	22.209	44.2081	63.2887	37.217	126.312	49.9195	1.21876	0.377984	3.22437	0.00126251	0.00523688
hsa-let-7g-5p	6444.58	4307.33	2195.08	1220.23	5063.97	4436.85	8664.67	9158.76	9373.8	7413.1	7446.11	9748.87	3944.68	8634.22	-1.12521	0.34922	-3.22207	0.00127268	0.00525548
hsa-miR-3664-3p	45.7062	2.1703	0	0	13.0036	0	0.221813	0.584664	0	0.74929	0.610012	0.437847	10.1467	0.433938	3.37433	1.04785	3.22026	0.00128076	0.00526534
hsa-miR-154-5p	45.7062	120.814	124.104	160.882	70.5909	118.632	66.5438	64.313	53.143	62.1911	59.4761	75.3096	106.788	63.4961	0.831274	0.261694	3.17652	0.00149056	0.00610074
hsa-miR-548e-5p	0	9.40465	0	74.2535	22.2919	0	4.87988	4.09265	1.98295	0.374645	2.89756	1.53246	17.6583	2.62669	2.76235	0.872453	3.16619	0.00154449	0.00629362
hsa-miR-651-5p	0	4.34061	0	7.42535	9.28828	0	0	0	0	0	0.457509	0	3.50904	0.0762515	4.56513	1.44866	3.15128	0.00162556	0.00659491
hsa-miR-375-3p	22.8531	2.1703	77.5648	2.47512	14.8613	7.90883	2.43994	3.21565	3.9659	2.99716	6.10012	3.7217	21.3056	3.74008	2.35291	0.747739	3.1467	0.00165122	0.00666977
hsa-miR-23b-3p	1462.6	1415.04	1403.92	1408.34	1346.8	1478.95	1544.7	2381.34	1979.38	1834.64	2004.65	1947.54	1419.28	1948.71	-0.460533	0.146555	-3.1424	0.00167568	0.00668146
hsa-miR-548ad-5p	45.7062	4.34061	54.2953	56.9276	57.5873	0	16.8578	6.72364	2.77613	8.99148	8.99767	5.69201	36.4762	8.33978	2.05836	0.655032	3.14238	0.00167578	0.00668146
hsa-miR-548ae-5p	45.7062	4.34061	54.2953	56.9276	57.5873	0	16.8578	6.72364	2.77613	8.99148	8.99767	5.69201	36.4762	8.33978	2.05836	0.655032	3.14238	0.00167578	0.00668146
hsa-miR-27b-5p	479.915	338.568	81.443	240.086	159.758	213.538	481.555	606.881	467.976	428.594	567.311	470.466	252.218	503.797	-1.05672	0.340051	-3.10753	0.00188656	0.00748957
hsa-miR-1307-3p	1668.28	1274.69	1407.8	2034.54	1268.78	1589.68	1505.66	2502.65	3251.64	2395.48	2577.6	2831.55	1540.63	2510.77	-0.706236	0.227571	-3.10336	0.00191336	0.00756349
hsa-miR-3177-3p	45.7062	16.639	7.75648	0	3.71531	0	17.745	28.6485	49.1771	30.3463	39.3458	30.2114	12.3028	32.579	-1.86117	0.600604	-3.09883	0.00194286	0.00764742
hsa-miR-181c-5p	799.859	1694.28	2501.46	1747.43	951.12	2230.29	768.803	1064.67	912.553	805.862	551.451	1026.09	1654.07	854.906	0.953575	0.308223	3.09378	0.00197624	0.00774584
hsa-miR-505-5p	0	2.89374	0	2.47512	0	15.8177	6.65438	14.0319	30.1408	10.8647	12.9627	14.6679	3.53109	14.8871	-2.29472	0.742061	-3.09236	0.00198573	0.00775021
hsa-miR-12135	0	0	0	0	0	0	24.3994	9.35462	1.18977	6.74361	5.49011	5.03524	0	8.70212	-3.32319	1.07622	-3.08783	0.00201621	0.0078361
hsa-miR-548f-5p	0	0.723435	0	7.42535	11.1459	0	0.443625	0.584664	0	0	0.152503	0.218923	3.21579	0.233286	3.68814	1.20319	3.06529	0.00217456	0.00841617
hsa-miR-548h-3p	0	7.23435	0	19.8009	0	0	0.443625	0.584664	0	0.374645	0.457509	0.65677	4.50588	0.419536	3.4041	1.11234	3.06032	0.00221104	0.00848637
hsa-miR-548z	0	7.23435	0	19.8009	0	0	0.443625	0.584664	0	0.374645	0.457509	0.65677	4.50588	0.419536	3.4041	1.11234	3.06032	0.00221104	0.00848637
hsa-miR-494-3p	114.266	354.483	356.798	841.539	735.632	379.624	234.9	194.108	120.167	212.049	206.336	292.482	463.724	210.007	1.16534	0.38137	3.05568	0.0022455	0.008583
hsa-miR-889-5p	0	10.1281	3.87824	0	11.1459	0	20.6286	14.9089	27.3647	28.473	19.9779	26.2708	4.19204	22.9373	-1.80693	0.596005	-3.03174	0.0024315	0.00925569
hsa-miR-1193	22.8531	1.44687	0	0	1.85766	0	4.43625	12.8626	13.0875	6.36897	13.4203	17.076	4.35961	11.2086	-2.52171	0.83705	-3.01262	0.00259003	0.00981876
hsa-miR-450a-5p	159.972	344.355	170.642	108.905	330.663	529.892	219.373	117.81	25.3817	24.7266	72.5914	59.5471	274.071	86.5716	1.63528	0.545491	2.99781	0.00271928	0.0102667
hsa-miR-26b-3p	0	14.4687	7.75648	39.6018	26.0072	31.6353	64.5475	44.1421	42.8317	42.7095	47.4284	47.5064	19.9116	48.1943	-1.12411	0.376954	-2.9821	0.0028628	0.0107601
hsa-miR-548b-5p	0	0	23.2694	0	11.1459	0	0.887251	0.584664	0.39659	0.74929	0.305006	0.437847	5.73589	0.560108	3.23831	1.08632	2.98099	0.00287323	0.0107601
hsa-miR-423-3p	23058.8	14042.6	27004.2	25736.2	18127	18973.3	20786.3	35932.6	45175.1	35672.6	34496.9	36482.7	21157	34757.7	-0.713779	0.240195	-2.97166	0.00296191	0.0110474
hsa-miR-1306-3p	0	2.89374	11.6347	7.42535	1.85766	7.90883	7.76344	19.8786	36.8829	15.7351	20.5879	17.2949	5.28671	19.6905	-1.86727	0.629359	-2.96694	0.00300776	0.0110953
hsa-miR-548ay-5p	45.7062	4.34061	54.2953	39.6018	57.5873	0	16.8578	6.72364	2.77613	8.99148	8.99767	5.69201	33.5886	8.33978	1.92862	0.650101	2.96664	0.00301074	0.0110953
hsa-miR-548d-5p	45.7062	4.34061	54.2953	39.6018	57.5873	0	16.8578	6.72364	2.77613	8.99148	8.99767	5.69201	33.5886	8.33978	1.92862	0.650101	2.96664	0.00301074	0.0110953
hsa-miR-6850-3p	0	5.06404	0	0	14.8613	7.90883	0	0	1.18977	0	0.152503	0	4.63902	0.223712	4.04222	1.36389	2.96374	0.0030393	0.0111561
hsa-miR-184	0	0	3.87824	24.7512	3.71531	0	0	0	1.18977	0	0.152503	0	5.39078	0.223712	4.14635	1.41388	2.9326	0.0033614	0.0122897
hsa-miR-30a-5p	31285.9	32406.3	8784.21	9836.11	16665	17162.2	51048.8	50590.7	35649.5	34532.2	28774.3	38366.5	19356.6	39827	-1.03298	0.353337	-2.9235	0.0034612	0.0126048
hsa-miR-576-3p	0	15.9156	11.6347	14.8507	7.43063	7.90883	5.76713	1.75399	0	2.24787	2.13504	2.846	9.62341	2.45834	2.09857	0.718387	2.92123	0.00348656	0.0126473
hsa-miR-424-3p	3085.17	1179.2	969.56	811.838	1946.82	1455.23	1725.48	3552.42	5591.92	1598.24	5592.28	3778.4	1574.64	3639.79	-1.2061	0.413073	-2.91982	0.00350232	0.0126549
hsa-miR-193b-3p	1211.22	959.998	1047.12	1613.78	828.515	1241.69	1141	2067.66	2459.65	1460.37	2041.25	2609.78	1150.39	1963.29	-0.771087	0.265548	-2.90375	0.0036872	0.0132711
hsa-miR-551b-3p	22.8531	5.06404	42.6606	32.1765	1.85766	23.7265	11.9779	0.876996	1.18977	4.1211	3.50757	2.846	21.3897	4.08655	2.21324	0.765438	2.89147	0.00383444	0.0137378
hsa-miR-5699-5p	0	9.40465	11.6347	47.0272	16.7189	7.90883	9.98157	4.96964	4.75908	4.87039	5.3376	3.50277	15.449	5.57018	1.64747	0.569965	2.89048	0.00384658	0.0137378
hsa-miR-191-3p	91.4125	32.5546	62.0518	69.3032	27.8648	15.8177	89.3905	84.7763	81.3009	96.2838	78.234	81.2206	49.8341	85.201	-0.921423	0.319093	-2.88763	0.00388153	0.0138093
hsa-miR-100-3p	182.825	303.843	205.547	908.367	120.748	181.903	278.597	95.8849	15.0704	39.3377	41.9383	51.447	317.205	87.0458	1.8261	0.6367	2.86807	0.00412989	0.0146366
hsa-miR-23a-3p	2399.58	3430.53	6007.39	6766.96	3689.31	3819.97	2521.57	2863.1	2655.57	2610.15	2011.82	2787.77	4352.29	2575	0.758296	0.264688	2.86486	0.00417189	0.014729
hsa-miR-3158-3p	22.8531	65.8326	248.207	264.837	92.8828	94.906	58.1149	57.2971	66.6271	55.0728	71.5239	57.7958	131.587	61.0719	1.16651	0.40821	2.85762	0.00426825	0.0149551
hsa-miR-500b-3p	0	2.1703	0	7.42535	11.1459	0	0	0.584664	0	0	0.610012	0	3.45693	0.199113	3.80769	1.33238	2.8578	0.00426583	0.0149551
hsa-miR-1285-3p	45.7062	88.9825	221.06	126.231	118.89	94.906	63.4384	83.3146	69.4032	68.56	74.1164	64.3635	115.963	70.5327	0.792507	0.280788	2.82243	0.00476608	0.0166363
hsa-miR-188-3p	0	1.44687	0	17.3258	14.8613	0	1.10906	0.584664	0	1.12394	0.457509	1.75139	5.60565	0.83776	2.81544	1.00098	2.81267	0.00491316	0.0170852
hsa-miR-188-5p	0	110.686	7.75648	64.353	141.182	63.2707	22.6249	33.6182	15.467	16.859	34.9232	24.0816	64.5413	24.5956	1.49214	0.533452	2.79713	0.00515584	0.0177953
hsa-miR-31-5p	33159.9	27896.4	6806.31	14288.8	12860.6	21290.6	40656.7	31071.1	20851.1	73877	47630.8	40206.1	19383.8	42382.1	-1.11736	0.399336	-2.79804	0.00514144	0.0177953
hsa-miR-628-3p	0	1.44687	0	0	9.28828	0	9.75976	12.8626	8.32839	11.9886	12.5052	14.8868	1.78919	11.7219	-1.9952	0.715884	-2.78704	0.00531916	0.0182908
hsa-miR-143-5p	685.593	350.143	519.684	428.195	209.915	355.897	577.378	767.956	1174.7	620.038	516.985	899.775	424.905	759.472	-0.873169	0.313545	-2.78483	0.00535564	0.018348
hsa-miR-126-5p	68.5593	471.68	73.6865	118.806	139.324	23.7265	110.906	47.9425	5.55226	29.2223	18.1478	29.9925	149.297	40.2939	1.87186	0.672883	2.78184	0.00540509	0.0183813
hsa-miR-381-5p	0	2.1703	11.6347	2.47512	0	7.90883	12.1997	11.6933	9.91475	12.7379	11.5902	12.4786	4.03149	11.7691	-1.74524	0.627284	-2.78222	0.00539881	0.0183813
hsa-miR-1294	0	2.89374	0	0	0	0	4.87988	9.35462	11.5011	8.24219	7.47264	9.63263	0.48229	8.51384	-2.37751	0.863904	-2.75205	0.00592226	0.0200663
hsa-miR-196a-3p	22.8531	114.303	50.4171	467.797	174.62	118.632	23.5121	44.4345	3.9659	117.639	2.28754	7.88124	158.104	33.2866	2.17839	0.795715	2.73765	0.00618792	0.0208257
hsa-miR-23b-5p	22.8531	0.723435	3.87824	0	0	0	3.549	4.96964	31.7272	13.4872	12.0477	7.66232	4.5758	12.2405	-2.62988	0.960699	-2.73747	0.00619143	0.0208257
hsa-miR-21-3p	19722.2	16705.6	59352.6	79540.3	21777.3	47634.9	22242.7	16873.1	22847.5	18306.3	16150.1	20798.6	40788.8	19536.4	1.05172	0.385797	2.7261	0.00640866	0.0214008
hsa-miR-622	251.384	0	0	0	0	47.453	0	0	0	0	0	0	49.8062	0	5.10452	1.87224	2.72643	0.00640237	0.0214008
hsa-miR-185-5p	0	5.78748	0	19.8009	7.43063	0	2.43994	1.46166	1.18977	1.49858	1.67753	1.31354	5.50317	1.59684	2.06654	0.760779	2.71634	0.00660072	0.0219628
hsa-miR-4301	205.678	4.34061	0	0	0	39.5442	0	0	0	0	0	0	41.5938	0	5.07519	1.87356	2.70885	0.00675165	0.0223845
hsa-miR-12136	365.65	186.646	639.909	79.2037	230.349	340.08	191.424	31.5719	70.1964	105.275	202.524	25.3951	306.973	104.398	1.51149	0.561015	2.69421	0.00705551	0.0233084
hsa-miR-495-3p	22.8531	73.0669	54.2953	2.47512	91.0252	63.2707	34.8246	18.1246	7.53521	19.1069	16.1653	12.2597	51.1644	18.0027	1.5355	0.571653	2.68607	0.00722972	0.0237989
hsa-miR-145-3p	137.119	311.077	302.503	292.064	176.477	213.538	269.502	115.763	74.9555	91.788	74.7264	96.983	238.796	120.62	1.00874	0.37715	2.67463	0.00748125	0.0245396
hsa-miR-6850-5p	0	5.06404	0	17.3258	27.8648	0	0.221813	2.63099	0	2.24787	2.44005	0.875693	8.37578	1.40274	2.63457	0.988998	2.66388	0.00772443	0.0252477
hsa-miR-1298-5p	22.8531	0	127.982	0	0	0	0	0	0	0	0	0	25.1392	0	4.98697	1.87761	2.65601	0.00790709	0.0256634
hsa-miR-1972	68.5593	0	11.6347	7.42535	5.57297	0	1.10906	1.46166	3.56931	1.12394	0.915018	1.09462	15.5321	1.5456	2.40624	0.905826	2.6564	0.00789789	0.0256634
hsa-miR-3613-3p	0	5.06404	15.513	34.6516	0	15.8177	3.10538	2.33866	0.39659	2.99716	4.72759	2.846	11.841	2.73523	2.09281	0.791448	2.64427	0.00818662	0.0263854
hsa-miR-98-5p	1942.51	1263.12	411.093	210.385	1099.73	933.242	2723.86	2379.58	1597.86	1831.27	2052.23	2201.93	976.681	2131.12	-1.12795	0.426531	-2.64448	0.00818177	0.0263854
hsa-miR-2115-3p	0	0	15.513	0	0	7.90883	0	0	0	0	0	0	3.90363	0	4.65212	1.76234	2.63975	0.00829683	0.0265556
hsa-miR-378d	0	2.89374	7.75648	7.42535	0	23.7265	0.665438	0.292332	1.98295	0.374645	2.13504	0	6.96701	0.908401	2.653	1.00466	2.64069	0.00827372	0.0265556
hsa-miR-15a-5p	571.328	667.007	740.743	272.263	837.803	482.439	575.604	280.346	161.015	284.73	305.463	284.819	595.264	315.33	0.913098	0.347614	2.62676	0.00862029	0.0272142
hsa-miR-197-5p	22.8531	15.9156	42.6606	42.077	37.1531	39.5442	36.8209	65.7747	120.96	62.9404	63.5937	67.8662	33.3673	69.6593	-1.05375	0.401107	-2.62711	0.00861141	0.0272142
hsa-miR-2682-3p	22.8531	12.2984	11.6347	9.90046	3.71531	23.7265	6.43257	2.04632	0.39659	2.24787	5.1851	3.50277	14.0214	3.30187	1.74949	0.665197	2.63003	0.0085377	0.0272142
hsa-miR-758-5p	0	11.575	31.0259	27.2263	53.872	23.7265	15.5269	8.1853	12.2943	13.1126	11.4377	12.0408	24.5709	12.0996	1.17642	0.447633	2.62809	0.00858666	0.0272142
hsa-let-7f-5p	40472.9	30256.9	26849	14281.4	40522.9	34450.9	67055.5	59499.2	36077.4	47821.6	46294.2	51892.3	31139	51440	-0.72096	0.276134	-2.61091	0.00903029	0.0284116
hsa-miR-10394-5p	319.944	0	0	0	0	55.3618	0	0	0	0.374645	0	0	62.5509	0.0624408	4.86304	1.87009	2.60043	0.0093107	0.0288524
hsa-miR-487b-3p	1599.72	1380.31	577.857	1039.55	1562.29	988.604	2159.57	1517.5	1632.36	2155.71	1731.52	2356.71	1191.39	1925.56	-0.697204	0.268311	-2.59849	0.00936351	0.0288524
hsa-miR-548aj-5p	0	0.723435	0	7.42535	11.1459	0	0.887251	0.876996	0	0	0.152503	0.218923	3.21579	0.355945	3.15005	1.21269	2.59757	0.00938873	0.0288524
hsa-miR-548ar-5p	0	0.723435	0	7.42535	11.1459	0	0.887251	0.876996	0	0	0.152503	0.218923	3.21579	0.355945	3.15005	1.21269	2.59757	0.00938873	0.0288524
hsa-miR-548g-5p	0	0.723435	0	7.42535	11.1459	0	0.887251	0.876996	0	0	0.152503	0.218923	3.21579	0.355945	3.15005	1.21269	2.59757	0.00938873	0.0288524
hsa-miR-548n	0	5.78748	19.3912	4.95023	9.28828	0	4.21444	1.16933	0	0.74929	0.762515	1.75139	6.56953	1.44116	2.26176	0.869702	2.60061	0.00930581	0.0288524
hsa-miR-548x-5p	0	0.723435	0	7.42535	11.1459	0	0.887251	0.876996	0	0	0.152503	0.218923	3.21579	0.355945	3.15005	1.21269	2.59757	0.00938873	0.0288524
hsa-miR-1185-2-3p	114.266	84.6419	19.3912	64.353	24.1495	15.8177	85.3979	89.1613	110.649	162.971	89.3667	109.462	53.7698	107.834	-1.09175	0.421667	-2.58912	0.00962206	0.0294715
hsa-miR-212-3p	0	30.3843	15.513	51.9774	50.1567	31.6353	57.0058	66.3594	41.2453	139.743	61.6112	87.5693	29.9444	75.5889	-1.12231	0.435771	-2.57546	0.0100106	0.0305603
hsa-miR-19a-5p	0	4.34061	7.75648	2.47512	0	0	0	0	0.79318	0	0	0	2.4287	0.132197	3.92377	1.53249	2.56039	0.0104556	0.0318138
hsa-miR-214-5p	251.384	212.69	182.277	212.86	170.904	166.085	266.619	291.455	251.438	234.528	272.675	265.773	199.367	263.748	-0.432259	0.169013	-2.55756	0.0105411	0.0319688
hsa-miR-99b-3p	548.475	353.76	232.694	663.331	365.958	442.895	495.751	635.53	738.847	921.627	608.639	867.593	434.519	711.331	-0.726046	0.284357	-2.55329	0.010671	0.0322571
hsa-miR-378i	0	12.2984	50.4171	29.7014	7.43063	7.90883	2.66175	9.35462	4.36249	2.62252	11.1327	7.44339	17.9594	6.26291	1.60525	0.629007	2.55205	0.0107092	0.0322672
hsa-miR-548bc	0	1.44687	0	22.276	11.1459	0	1.99631	0	0	0	0	0.218923	5.81147	0.369206	3.5468	1.39103	2.54976	0.0107797	0.032374
hsa-miR-302a-5p	0	7.23435	0	14.8507	5.57297	7.90883	1.33088	2.63099	1.98295	0.374645	2.74505	1.75139	5.92781	1.80265	1.86979	0.742571	2.51799	0.0118025	0.0353311
hsa-miR-556-5p	0	0	11.6347	7.42535	0	0	0.443625	0	0	0	0.305006	0	3.17668	0.124772	3.8686	1.5407	2.51093	0.0120415	0.0359303
hsa-miR-3126-5p	0	7.23435	7.75648	0	24.1495	31.6353	21.9595	12.8626	30.934	53.9489	32.4831	84.0666	11.7959	39.3758	-1.66375	0.66518	-2.50121	0.012377	0.0368126
hsa-miR-29a-3p	9506.9	8349.89	7733.21	5398.23	11755.2	7465.94	16314.5	11324.9	11513	8444.5	13004.5	15396	8368.23	12666.3	-0.596298	0.242002	-2.46402	0.0137388	0.0407319
hsa-let-7i-3p	22.8531	39.7889	81.443	24.7512	83.5945	39.5442	39.039	27.7715	28.5545	13.8619	21.6554	23.2059	48.6625	25.6814	0.997304	0.405461	2.45968	0.0139061	0.0410962
hsa-miR-615-5p	68.5593	69.4498	244.329	321.765	148.613	142.359	64.3257	60.8051	128.099	89.1655	95.3143	88.445	165.846	87.6924	0.955546	0.389988	2.4502	0.0142779	0.0420606
hsa-miR-181c-3p	205.678	332.78	442.119	492.548	302.798	482.439	281.258	289.409	307.754	239.024	204.964	251.324	376.394	262.289	0.552276	0.226039	2.44328	0.0145544	0.0427392
hsa-miR-3913-5p	0	1.44687	15.513	24.7512	11.1459	0	3.32719	2.63099	1.18977	3.37181	2.74505	3.94062	8.80949	2.86757	1.75798	0.720067	2.4414	0.0146303	0.0428259
hsa-miR-370-3p	1942.51	969.403	2074.86	2007.32	1242.77	1455.23	1500.78	2274.93	3440.02	2655.11	2461.4	3003.63	1615.35	2555.98	-0.664971	0.272588	-2.43947	0.0147087	0.0429198
hsa-miR-125b-1-3p	9095.54	7222.05	5573.03	12056.3	6912.34	6667.15	7623.04	12300.7	12526.3	13344.5	12350.1	12901.6	7921.07	11841	-0.578543	0.238607	-2.42467	0.0153222	0.0445692
hsa-miR-337-3p	0	49.917	34.9041	24.7512	81.7369	7.90883	33.0501	14.0319	3.9659	11.614	8.69267	9.19478	33.203	13.4249	1.45621	0.602931	2.41521	0.015726	0.045458
hsa-miR-496	0	17.3624	46.5389	94.0544	72.4486	31.6353	32.3846	21.3402	7.9318	19.4815	15.7078	25.1762	43.6733	20.337	1.22034	0.505204	2.41553	0.0157123	0.045458
hsa-miR-6852-5p	22.8531	28.214	46.5389	29.7014	11.1459	39.5442	24.843	79.222	89.6293	45.7067	51.6985	77.9367	29.6662	61.506	-1.06614	0.441641	-2.41405	0.0157761	0.0454608
hsa-miR-6786-3p	22.8531	0	0	0	0	0	3.549	9.64696	5.94885	3.37181	7.01513	10.9462	3.80885	6.74632	-2.52185	1.04813	-2.40605	0.0161263	0.0463254
hsa-miR-143-3p	96097.4	244157	180136	144730	173122	135209	167400	107844	79832.7	65343.7	60438.1	97838.1	162242	96449.5	0.745633	0.310145	2.40414	0.0162104	0.046423
hsa-miR-4762-5p	0	6.51091	0	12.3756	0	7.90883	1.33088	0.876996	0	0	0.610012	1.31354	4.46589	0.688571	2.61711	1.08932	2.40252	0.0162824	0.0464851
hsa-miR-22-3p	416178	544405	147175	97784.4	191058	217398	486750	643409	380556	489726	467832	634671	269000	517157	-0.933546	0.389179	-2.39876	0.0164509	0.0468218
hsa-miR-3940-3p	0	1.44687	46.5389	9.90046	16.7189	23.7265	3.77081	7.01597	4.36249	8.24219	4.42259	5.25416	16.3886	5.51137	1.56319	0.654111	2.38979	0.0168579	0.047833
hsa-miR-548am-5p	22.8531	7.23435	0	4.95023	0	15.8177	3.32719	0.584664	0.39659	0.74929	0.610012	1.31354	8.47589	1.16355	2.15566	0.90615	2.37892	0.0173636	0.0486707
hsa-miR-548c-5p	22.8531	7.23435	0	4.95023	0	15.8177	3.32719	0.584664	0.39659	0.74929	0.610012	1.31354	8.47589	1.16355	2.15566	0.90615	2.37892	0.0173636	0.0486707
hsa-miR-548o-5p	22.8531	7.23435	0	4.95023	0	15.8177	3.32719	0.584664	0.39659	0.74929	0.610012	1.31354	8.47589	1.16355	2.15566	0.90615	2.37892	0.0173636	0.0486707
hsa-miR-550a-3p	0	1.44687	19.3912	0	1.85766	0	0.221813	0.584664	1.58636	0.374645	0.762515	0.437847	3.78262	0.661307	2.48709	1.04455	2.381	0.0172657	0.0486707
hsa-miR-4767	0	21.703	23.2694	96.5295	5.57297	7.90883	8.42888	11.1086	7.13862	7.86755	17.6903	4.81631	25.8306	9.50839	1.55645	0.654753	2.37716	0.0174466	0.0487555
hsa-miR-590-5p	0	5.78748	0	7.42535	0	0	0	0	0	0	0.305006	0	2.20214	0.0508343	3.99733	1.68321	2.37482	0.0175575	0.0489176
hsa-miR-193b-5p	91.4125	90.4294	58.1736	86.629	105.886	102.815	59.4458	159.906	222.487	122.884	142.133	315.906	89.2243	170.46	-0.928251	0.392078	-2.36752	0.0179079	0.0497442
hsa-miR-219a-5p	0	7.23435	0	0	5.57297	0	0	0	0	0	0	0	2.13455	0	4.25273	1.80215	2.3598	0.0182847	0.0506388
hsa-miR-146b-3p	68.5593	56.4279	15.513	54.4525	39.0108	63.2707	42.1444	240.005	64.2475	31.4702	182.089	139.454	49.539	116.568	-1.26487	0.536434	-2.35792	0.0183777	0.0507443
hsa-miR-25-5p	159.972	51.3639	100.834	272.263	81.7369	71.1795	100.038	216.91	333.135	269.744	247.512	326.634	122.891	248.996	-1.02792	0.436467	-2.35509	0.0185185	0.0509809
hsa-miR-3127-5p	0	5.78748	19.3912	0	3.71531	0	5.76713	16.0783	34.5033	16.859	19.3679	15.7625	4.81566	18.0563	-1.62746	0.692764	-2.34922	0.0188125	0.0515262
hsa-miR-423-5p	58412.6	47612.9	70013.8	67976.6	48795.1	56753.8	40936.2	91637	134839	96985.9	80485.4	98355.2	58260.8	90539.7	-0.632997	0.269484	-2.34892	0.0188279	0.0515262
hsa-miR-4429	0	3.61717	0	22.276	0	0	0	0	1.18977	1.12394	0.457509	0.218923	4.31554	0.498356	3.03204	1.29394	2.34326	0.0191161	0.0521604
hsa-miR-1248	0	0	0	9.90046	9.28828	0	0.443625	0	0	0	0	0.65677	3.19812	0.183399	3.57538	1.52734	2.34091	0.0192367	0.0523352
hsa-miR-6753-3p	0	0	11.6347	9.90046	0	0	0.443625	0.584664	0.39659	0.374645	0.762515	0.875693	3.5892	0.572955	2.57786	1.10252	2.33814	0.01938	0.0525704
hsa-miR-4451	0	1.44687	11.6347	0	0	0	0	0.292332	0	0	0.305006	0	2.18026	0.0995563	3.65488	1.5779	2.3163	0.0205422	0.05556
hsa-miR-340-5p	137.119	504.234	484.78	336.616	352.955	308.444	395.27	255.791	114.218	128.503	111.937	143.395	354.025	191.519	0.909536	0.394314	2.30662	0.0210757	0.0568369
hsa-miR-132-3p	548.475	428.997	345.163	358.892	564.728	482.439	420.113	648.392	600.437	1088.72	555.873	894.083	454.782	701.27	-0.636218	0.277863	-2.28968	0.0220398	0.0590923
hsa-miR-134-3p	0	13.7453	34.9041	14.8507	14.8613	31.6353	25.9521	28.9409	36.8829	51.701	26.993	44.0036	18.3328	35.7456	-0.926446	0.404613	-2.28971	0.0220381	0.0590923
hsa-miR-584-5p	228.531	137.453	120.225	84.1539	215.488	63.2707	190.093	283.27	480.667	177.582	267.643	140.33	141.52	256.597	-0.888054	0.389709	-2.27876	0.0226814	0.0606367
hsa-miR-548d-3p	0	0	0	0	22.2919	0	0	0	0	0	0	0	3.71531	0	4.26549	1.87589	2.27385	0.0229748	0.0612441
hsa-miR-500a-3p	1165.51	1503.3	376.189	895.992	897.248	869.972	944.256	2331.06	1234.98	1903.95	2009.07	1322.08	951.368	1624.23	-0.768539	0.339192	-2.26579	0.023464	0.0623683
hsa-miR-29c-3p	22.8531	54.2576	151.251	54.4525	68.7333	47.453	70.98	28.6485	26.9681	20.9801	18.9104	39.1873	66.5001	34.2791	1.01595	0.449872	2.2583	0.0239269	0.0634166
hsa-let-7b-3p	22.8531	46.2998	58.1736	103.955	57.5873	55.3618	17.5232	34.2028	49.9703	35.2166	28.518	42.4711	57.3718	34.6504	0.81999	0.36393	2.25315	0.0242497	0.0639991
hsa-miR-548au-5p	22.8531	7.23435	0	4.95023	0	15.8177	3.32719	0.876996	0.79318	1.12394	1.06752	1.31354	8.47589	1.41706	1.8843	0.836504	2.25259	0.0242851	0.0639991
hsa-miR-3605-5p	91.4125	31.1077	27.1477	44.5521	27.8648	31.6353	36.8209	46.7731	74.5589	85.7937	53.071	99.829	42.2867	66.1411	-0.87137	0.387614	-2.24803	0.024574	0.0645767
hsa-miR-655-5p	0	0.723435	0	0	0	0	4.87988	4.38498	4.36249	4.87039	2.74505	3.7217	0.120572	4.16075	-2.1091	0.939602	-2.24467	0.0247892	0.0649575
hsa-miR-17-5p	274.237	402.23	407.215	198.009	516.428	332.171	289.466	239.42	239.54	186.948	279.843	133.324	355.048	228.09	0.656378	0.292769	2.24197	0.0249633	0.065229
hsa-miR-3074-5p	0	0	3.87824	0	0	0	2.43994	4.09265	4.75908	5.24503	4.27008	5.91093	0.646373	4.45295	-2.08066	0.932797	-2.23056	0.0257103	0.0668034
hsa-miR-3183	0	1.44687	0	0	16.7189	0	0.443625	0	1.18977	0.374645	0.305006	0	3.02763	0.385508	2.98076	1.33613	2.2309	0.0256878	0.0668034
hsa-miR-26a-2-3p	0	1.44687	0	19.8009	0	15.8177	3.10538	0.876996	0	0.374645	1.22002	0.437847	6.17758	1.00248	2.42163	1.10077	2.19993	0.0278117	0.0720612
hsa-miR-548ap-5p	0	5.78748	15.513	0	1.85766	15.8177	1.55269	1.16933	0	2.99716	2.44005	0.875693	6.49596	1.50582	1.96602	0.894835	2.19707	0.0280151	0.0721838
hsa-miR-548j-5p	0	5.78748	15.513	0	1.85766	15.8177	1.55269	1.16933	0	2.99716	2.44005	0.875693	6.49596	1.50582	1.96602	0.894835	2.19707	0.0280151	0.0721838
hsa-miR-365b-5p	502.769	267.671	290.868	373.742	458.841	347.989	349.133	600.158	736.864	338.679	736.437	651.954	373.647	568.871	-0.630005	0.287962	-2.1878	0.0286838	0.0737015
hsa-miR-548az-5p	0	0	34.9041	0	0	0	0.665438	1.16933	0	0.374645	0.610012	0	5.81736	0.469904	3.14278	1.43892	2.18412	0.0289535	0.0741883
hsa-miR-27a-5p	137.119	137.453	259.842	811.838	115.175	110.724	50.1297	61.0974	143.566	212.798	153.113	39.6251	262.025	110.055	1.24399	0.569976	2.18253	0.0290704	0.0742821
hsa-miR-3187-5p	0	0	23.2694	0	0	0	0.443625	0	0.39659	0.374645	0.610012	0	3.87824	0.304145	3.19179	1.46372	2.18059	0.0292135	0.074442
hsa-miR-3615	754.153	371.122	919.142	1106.38	514.571	672.251	749.727	988.959	1623.24	1373.45	1014.91	1101.62	722.936	1141.98	-0.659874	0.306307	-2.15429	0.0312176	0.0793303
hsa-miR-24-3p	388.503	925.273	853.212	804.412	672.472	822.519	464.254	744.57	461.234	499.027	431.278	609.264	744.399	534.938	0.503885	0.234812	2.14591	0.0318803	0.0807926
hsa-miR-33a-3p	0	0.723435	0	4.95023	11.1459	0	1.33088	0	0.39659	0.74929	0	0.218923	2.80327	0.44928	2.71721	1.2676	2.14359	0.0320655	0.0810398
hsa-miR-135b-5p	0	5.78748	0	2.47512	13.0036	15.8177	0.665438	3.21565	0.39659	0.374645	3.05006	2.40816	6.18064	1.68509	1.85194	0.865669	2.13932	0.0324101	0.0816877
hsa-miR-935	0	46.2998	0	19.8009	3.71531	39.5442	1.55269	216.91	84.077	158.1	10.2177	29.9925	18.2267	83.4751	-1.97585	0.924599	-2.13698	0.0325998	0.0819425
hsa-miR-1260a	708.447	220.648	244.329	1017.27	170.904	213.538	414.79	1210.25	2604.8	147.61	1064.32	887.077	429.19	1054.81	-1.2764	0.59838	-2.13309	0.0329177	0.0825172
hsa-miR-4284	0	5.78748	0	0	0	7.90883	0.221813	0.584664	0.39659	0	0	0	2.28272	0.200511	3.08702	1.45142	2.12689	0.0334292	0.083573
hsa-miR-328-3p	182.825	91.1528	112.469	168.308	120.748	276.809	182.108	245.267	211.382	204.556	248.58	317.658	158.719	234.925	-0.636582	0.29962	-2.12463	0.0336174	0.083817
hsa-miR-1260b	662.74	253.202	275.355	1094	211.773	245.174	451.832	1267.84	2711.48	145.362	1111.75	898.899	457.041	1097.86	-1.24169	0.585456	-2.1209	0.0339303	0.0843697
hsa-miR-10396a-3p	0	0	0	14.8507	0	7.90883	1.10906	0	0	0	0.152503	0.65677	3.79325	0.319723	3.05867	1.45063	2.10852	0.0349861	0.0867618
hsa-miR-3145-5p	0	0	19.3912	0	0	0	0	0	0	0	0	0	3.23187	0	3.98733	1.89476	2.1044	0.0353436	0.0869491
hsa-miR-412-5p	22.8531	62.2154	7.75648	4.95023	24.1495	0	15.9705	163.998	19.4329	190.32	21.9604	29.5546	20.3208	73.5394	-1.68542	0.800148	-2.10639	0.0351705	0.0869491
hsa-miR-6868-5p	0	0	19.3912	0	0	0	0	0	0	0	0	0	3.23187	0	3.98733	1.89476	2.1044	0.0353436	0.0869491
hsa-miR-154-3p	0	11.575	7.75648	9.90046	0	0	1.33088	1.16933	1.18977	3.37181	0.457509	0	4.87198	1.25321	2.15584	1.02679	2.0996	0.0357644	0.0877509
hsa-miR-655-3p	0	5.06404	0	9.90046	7.43063	7.90883	1.99631	2.92332	0	2.24787	0.915018	1.97031	5.05066	1.67547	1.72636	0.823497	2.09637	0.0360493	0.0882159
hsa-miR-6131	68.5593	0	0	0	0	23.7265	0	0	0.39659	0	0	0	15.381	0.0660983	3.94308	1.88283	2.09423	0.0362397	0.0884479
hsa-miR-545-3p	0	0.723435	0	0	0	15.8177	0	0	0	0.374645	0	0	2.75685	0.0624408	3.50396	1.67761	2.08866	0.0367386	0.0894294
hsa-miR-6730-5p	22.8531	5.78748	0	0	7.43063	0	3.99263	18.1246	11.5011	12.3633	12.3527	14.4489	6.01187	12.1305	-1.42937	0.687063	-2.08041	0.0374881	0.0910144
hsa-miR-4676-3p	0	0	19.3912	0	0	0	0.665438	0	0.39659	0	0.457509	0.218923	3.23187	0.289743	3.03999	1.46675	2.07261	0.038209	0.0925218
hsa-miR-182-5p	45.7062	60.7685	228.816	59.4028	156.043	31.6353	55.675	52.6198	82.8873	43.0842	46.0559	18.8274	97.062	49.8582	1.00377	0.487565	2.05874	0.0395187	0.0954433
hsa-miR-5682	0	0	0	0	3.71531	7.90883	0.221813	0	0	0	0	0	1.93736	0.0369688	3.51442	1.71379	2.05068	0.0402983	0.0970728
hsa-miR-6516-3p	0	6.51091	11.6347	0	0	0	1.33088	0	0.39659	0	0	0.218923	3.02427	0.324398	2.96336	1.44656	2.04855	0.0405062	0.09732
hsa-let-7e-3p	22.8531	31.8311	15.513	99.0046	53.872	63.2707	80.9616	77.7603	69.0066	152.481	73.2014	89.5396	47.7241	90.4917	-0.846513	0.413987	-2.04478	0.0408766	0.0979555
hsa-miR-3064-5p	0	3.61717	0	0	0	0	1.55269	8.1853	8.72498	9.36613	7.16764	7.88124	0.602862	7.14633	-1.99045	0.975398	-2.04066	0.041285	0.0986787
hsa-miR-3691-5p	0	6.51091	7.75648	0	7.43063	7.90883	7.76344	15.2013	16.2602	17.983	8.69267	13.3543	4.93447	13.2091	-1.18842	0.583265	-2.03753	0.0415966	0.0989122
hsa-miR-769-5p	2148.19	2583.39	3649.42	5900.67	2940.67	3764.6	2482.75	2390.4	2540.55	2118.62	2341.68	2853.45	3497.82	2454.57	0.513604	0.251985	2.03824	0.0415262	0.0989122
hsa-miR-4636	0	0	0	14.8507	0	0	0	0.292332	0.39659	0.374645	0	0	2.47512	0.177261	3.3069	1.6251	2.03489	0.041862	0.099288
hsa-miR-1287-3p	0	0	0	14.8507	0	0	0	0.292332	0	0	0	0	2.47512	0.048722	3.71021	1.8262	2.03165	0.0421888	0.0993899
hsa-miR-140-5p	22.8531	23.8734	19.3912	34.6516	16.7189	7.90883	18.6323	13.4473	7.53521	10.1154	12.8102	9.85155	20.8995	12.0653	0.848239	0.418196	2.02833	0.0425269	0.0993899
hsa-miR-28-3p	4867.71	6700.45	3393.46	2707.78	5901.77	2823.45	5799.74	6232.81	7149.32	7997.55	6197.87	5414.41	4399.11	6465.28	-0.552107	0.272262	-2.02785	0.0425754	0.0993899
hsa-miR-335-3p	914.125	2144.26	1469.85	1715.25	2580.28	1542.22	1324.22	1774.46	664.288	238.274	1118.46	517.097	1727.67	939.465	0.873401	0.43039	2.02932	0.0424255	0.0993899
hsa-miR-3912-3p	0	8.68122	27.1477	7.42535	0	0	6.43257	1.75399	0.79318	0.374645	0.610012	1.31354	7.20904	1.87966	1.96936	0.971955	2.02618	0.0427458	0.0993899
hsa-miR-429	0	6.51091	3.87824	0	1.85766	0	1.10906	0	0	0.374645	0.457509	0.65677	2.04113	0.432998	2.46363	1.21786	2.02291	0.0430819	0.0993899
hsa-miR-4677-3p	0	33.278	0	27.2263	42.7261	71.1795	21.0722	17.2476	4.75908	14.6112	13.4203	7.44339	29.0683	13.0923	1.20128	0.593848	2.02287	0.0430869	0.0993899
hsa-miR-4804-5p	0	0	0	0	3.71531	0	2.43994	4.96964	3.17272	7.86755	6.10012	6.5677	0.619219	5.18628	-1.89515	0.935083	-2.02672	0.0426915	0.0993899
hsa-miR-6501-5p	0	0	0	24.7512	0	0	0.221813	0	1.18977	0	0.457509	0	4.12519	0.311515	3.18818	1.57246	2.02751	0.0426102	0.0993899
hsa-miR-874-3p	114.266	116.473	193.912	202.959	139.324	189.812	182.774	222.172	272.061	186.199	262.915	221.988	159.458	224.685	-0.479595	0.237078	-2.02295	0.0430787	0.0993899
hsa-miR-93-5p	2285.31	1620.49	915.264	1237.56	1211.19	1739.94	1677.35	1810.41	2847.12	2079.28	2649.89	1788.6	1501.63	2142.11	-0.526492	0.26002	-2.02481	0.0428866	0.0993899
hsa-miR-340-3p	0	7.95778	0	0	0	0	23.734	11.1086	3.56931	10.8647	5.3376	13.1354	1.3263	11.2916	-1.96591	0.973078	-2.0203	0.0433519	0.0997525
hsa-miR-10527-5p	22.8531	12.2984	0	0	27.8648	0	16.6359	22.2172	36.8829	33.3434	15.5553	36.7791	10.5027	26.9023	-1.33938	0.664143	-2.01671	0.0437256	0.100223
hsa-miR-33b-3p	0	5.06404	0	42.077	13.0036	15.8177	5.10169	4.96964	6.34544	5.99432	5.49011	6.34878	12.6604	5.70833	1.27477	0.632244	2.01626	0.0437731	0.100223
hsa-miR-541-3p	0	2.89374	0	0	14.8613	15.8177	8.20707	14.6166	13.8806	18.7323	13.2678	18.6085	5.59544	14.5521	-1.30919	0.650632	-2.01218	0.044201	0.100953
hsa-miR-107	1965.37	2741.1	2288.16	1938.02	4800.18	2720.64	1625.89	2161.5	2016.26	1897.58	1983.3	1974.25	2742.24	1943.13	0.500899	0.249317	2.00909	0.0445281	0.101449
hsa-miR-7-5p	0	1.44687	15.513	0	13.0036	0	1.99631	2.04632	0	1.49858	0.915018	1.75139	4.9939	1.36794	1.95137	0.9762	1.99894	0.0456143	0.103669
hsa-miR-5701	0	10.8515	15.513	17.3258	0	0	1.99631	0.876996	4.75908	4.49574	1.37253	3.06493	7.28171	2.76093	1.60659	0.804547	1.99689	0.0458373	0.10392
hsa-miR-548aq-3p	0	6.51091	0	0	0	7.90883	0.665438	0	0.39659	0	0	0	2.40329	0.177005	3.11634	1.56344	1.99326	0.0462333	0.104562
hsa-miR-4800-3p	0	0.723435	0	0	0	15.8177	0	0	0	0	0	0	2.75685	0	3.5756	1.79486	1.99214	0.0463558	0.104583
hsa-miR-320a-5p	0	0	0	12.3756	0	0	0	0	0	0	0	0	2.0626	0	3.72036	1.89697	1.96121	0.0498544	0.11139
hsa-miR-3651	91.4125	1.44687	11.6347	0	0	63.2707	1.33088	2.33866	13.4841	7.11826	5.0326	3.06493	27.9608	5.39489	1.9256	0.98157	1.96175	0.0497913	0.11139
hsa-miR-561-3p	0	0	0	12.3756	0	0	0	0	0	0	0	0	2.0626	0	3.72036	1.89697	1.96121	0.0498544	0.11139
hsa-miR-6513-5p	0	0	0	0	0	0	0.665438	3.80032	3.56931	7.4929	3.81257	3.06493	0	3.73424	-2.18148	1.11125	-1.96309	0.0496352	0.11139
hsa-miR-3654	45.7062	0	0	0	0	15.8177	0	0	0	0	0	0	10.254	0	3.70708	1.89707	1.95411	0.0506885	0.11298
hsa-miR-18a-5p	0	62.9388	0	12.3756	78.0216	15.8177	21.9595	16.0783	7.53521	8.24219	12.3527	5.47308	28.1923	11.9402	1.3754	0.704709	1.95172	0.0509711	0.113337
hsa-miR-4755-3p	0	0	0	9.90046	5.57297	7.90883	0.443625	0.584664	2.77613	1.12394	0.305006	0.65677	3.89704	0.981688	2.01077	1.03233	1.9478	0.051439	0.114103
hsa-miR-3129-5p	0	12.2984	34.9041	17.3258	48.2991	47.453	15.9705	16.3706	8.32839	10.1154	23.943	12.9165	26.7134	14.6074	0.928153	0.477325	1.94449	0.0518365	0.11471
hsa-miR-219b-3p	0	0.723435	0	0	0	15.8177	0.443625	0	0.39659	0	0.152503	0	2.75685	0.165453	2.83834	1.46364	1.93923	0.0524727	0.115841
hsa-miR-1277-3p	0	0	0	12.3756	0	0	0.221813	0	0	0	0	0	2.0626	0.0369688	3.58076	1.84966	1.9359	0.0528803	0.116186
hsa-miR-338-3p	0	0	0	12.3756	0	0	0.221813	0	0	0	0	0	2.0626	0.0369688	3.58076	1.84966	1.9359	0.0528803	0.116186
hsa-miR-585-3p	22.8531	8.68122	0	2.47512	5.57297	0	8.42888	4.09265	9.91475	9.36613	17.0803	39.1873	6.59707	14.6783	-1.4506	0.754569	-1.92242	0.0545526	0.119293
hsa-miR-766-3p	0	8.68122	11.6347	61.8779	20.4342	0	4.65807	2.33866	9.91475	12.3633	9.60768	8.31909	17.1047	7.86692	1.30032	0.676111	1.92324	0.0544504	0.119293
hsa-miR-93-3p	22.8531	33.278	27.1477	14.8507	76.1639	31.6353	23.9558	18.4169	17.45	25.1012	19.0629	24.5194	34.3215	21.4177	0.772716	0.403135	1.91677	0.0552671	0.120571
hsa-miR-874-5p	22.8531	16.639	7.75648	22.276	1.85766	0	23.5121	20.7556	24.192	16.859	27.7555	22.9869	11.897	22.6769	-0.929982	0.487005	-1.9096	0.0561854	0.122286
hsa-miR-30b-3p	22.8531	3.61717	3.87824	7.42535	0	0	5.98894	9.06229	11.5011	14.2365	6.10012	13.5732	6.29565	10.077	-1.30668	0.686198	-1.90423	0.0568801	0.123507
hsa-miR-627-5p	0	18.8093	7.75648	0	0	15.8177	4.21444	3.50798	0.39659	1.49858	2.28754	1.09462	7.06391	2.16663	1.73498	0.922557	1.88062	0.0600234	0.130027
hsa-miR-330-5p	137.119	116.473	34.9041	22.276	61.3027	31.6353	115.343	104.655	97.1645	95.9091	94.8568	127.851	67.285	105.963	-0.739621	0.393669	-1.87879	0.0602734	0.130264
hsa-miR-146a-5p	6467.43	6523.94	1997.29	5799.19	4055.26	4065.14	12770.4	8655.07	2368.83	12131	6360.74	6543.18	4818.04	8138.21	-0.749108	0.402223	-1.86242	0.0625438	0.13423
hsa-miR-302d-3p	0	0	23.2694	0	3.71531	0	0.443625	1.16933	0.79318	0	2.28754	0.437847	4.49746	0.855254	2.25844	1.21229	1.86295	0.0624697	0.13423
hsa-miR-454-3p	22.8531	133.112	267.598	158.407	148.613	189.812	182.774	112.548	27.3647	65.5629	72.4389	58.8904	153.399	86.5964	0.861415	0.462371	1.86304	0.0624568	0.13423
hsa-miR-3684	0	2.89374	0	0	13.0036	0	0.443625	0.584664	0	1.87323	0.152503	0	2.64956	0.509003	2.49946	1.34337	1.86058	0.0628035	0.134475
hsa-miR-548u	0	5.78748	0	2.47512	0	0	0.665438	0.292332	0.39659	0	0.305006	0	1.3771	0.276561	2.60806	1.4042	1.85733	0.0632638	0.135019
hsa-miR-6738-5p	0	0	0	0	0	7.90883	3.10538	8.1853	7.9318	0.74929	4.88009	2.40816	1.31814	4.54334	-1.9843	1.0687	-1.85673	0.0633495	0.135019
hsa-miR-549a-3p	22.8531	94.0465	65.93	0	22.2919	7.90883	8.20707	32.7412	15.0704	1.87323	11.4377	9.63263	35.5051	13.1604	1.44297	0.77869	1.85308	0.0638714	0.135818
hsa-miR-9985	68.5593	33.278	0	22.276	9.28828	23.7265	13.9742	14.9089	8.72498	7.11826	10.8277	8.10016	26.188	10.609	0.992071	0.535728	1.85182	0.0640522	0.13589
hsa-miR-542-3p	91.4125	299.502	38.7824	14.8507	133.751	102.815	125.324	72.7907	13.0875	9.74077	30.5006	29.9925	113.519	46.906	1.25674	0.679883	1.84846	0.0645358	0.136603
hsa-miR-5000-3p	0	6.51091	0	0	7.43063	0	0.665438	1.46166	0.39659	1.12394	0.305006	1.09462	2.32359	0.841208	1.943	1.05275	1.84563	0.0649454	0.137156
hsa-miR-3124-5p	0	0	0	12.3756	0	15.8177	1.33088	1.16933	0.79318	0.74929	1.22002	0	4.69887	0.877116	2.17118	1.18439	1.83317	0.0667771	0.140703
hsa-miR-30c-5p	708.447	1519.94	903.629	608.878	1723.91	885.789	1312.91	596.942	404.918	673.986	436.616	595.253	1058.43	670.104	0.663288	0.365451	1.81499	0.0695259	0.146162
hsa-miR-337-5p	22.8531	44.1295	27.1477	34.6516	9.28828	7.90883	21.9595	10.2316	11.5011	13.4872	13.4203	17.5139	24.3298	14.6856	0.834297	0.460671	1.81105	0.0701337	0.147106
hsa-miR-939-5p	0	0.723435	0	24.7512	16.7189	7.90883	2.88356	3.80032	3.17272	4.1211	3.05006	4.15954	8.35039	3.53122	1.3784	0.766363	1.79862	0.0720784	0.150843
hsa-miR-3619-5p	0	0	27.1477	0	0	0	0	0.584664	1.18977	1.87323	0.305006	0.218923	4.52461	0.695265	2.47389	1.37757	1.79584	0.0725198	0.151424
hsa-miR-1275	45.7062	17.3624	0	47.0272	14.8613	39.5442	15.7487	42.3881	39.659	86.9177	55.9686	61.0796	27.4169	50.2936	-1.01068	0.564686	-1.78981	0.0734847	0.153093
hsa-miR-32-3p	0	4.34061	0	7.42535	3.71531	0	1.55269	0.876996	0	1.87323	1.06752	0.65677	2.58021	1.00453	1.7475	0.977862	1.78707	0.0739269	0.153668
hsa-miR-676-5p	0	0	0	0	9.28828	0	0	0	0	0	0.152503	0	1.54805	0.0254172	3.3511	1.88386	1.77884	0.0752657	0.1561
hsa-miR-6724-5p	0	0	0	12.3756	0	7.90883	3.549	9.06229	17.0534	16.1097	8.69267	10.7272	3.38073	10.8657	-1.57451	0.889312	-1.77048	0.0766478	0.158611
hsa-miR-10394-3p	68.5593	0	0	0	0	23.7265	0	0	0	1.49858	0.152503	0	15.381	0.275181	3.25839	1.85255	1.75886	0.0786007	0.162289
hsa-miR-708-5p	22.8531	117.92	162.886	155.932	133.751	86.9972	130.204	58.1741	57.5055	101.529	73.3539	70.0555	113.39	81.8036	0.58032	0.331565	1.75024	0.0800762	0.164968
hsa-miR-448	0	0	11.6347	0	0	0	0	0	0	0	0	0	1.93912	0	3.31293	1.89942	1.74418	0.0811278	0.166763
hsa-miR-1323	0	0	0	0	9.28828	0	0.221813	0	0	0	0	0	1.54805	0.0369688	3.26216	1.88224	1.73312	0.0830737	0.170339
hsa-miR-628-5p	0	23.8734	31.0259	24.7512	9.28828	63.2707	23.5121	21.0479	5.15567	7.86755	10.6752	11.8219	25.3682	13.3467	0.925518	0.534299	1.73221	0.083236	0.170339
hsa-miR-323a-5p	0	4.34061	0	4.95023	20.4342	7.90883	7.76344	12.8626	14.2772	35.9659	12.5052	20.1409	6.27232	17.2526	-1.15612	0.668521	-1.72938	0.083742	0.17062
hsa-miR-4435	68.5593	20.9796	23.2694	7.42535	27.8648	15.8177	25.7303	44.7268	53.5396	23.9773	30.3481	44.6604	27.3194	37.1637	-0.750066	0.433519	-1.73018	0.083598	0.17062
hsa-miR-1287-5p	45.7062	26.0437	19.3912	49.5023	7.43063	31.6353	49.0206	38.8802	47.1942	37.8392	42.8533	43.1279	29.9516	43.1526	-0.665963	0.386856	-1.72148	0.0851645	0.173137
hsa-miR-541-5p	22.8531	18.8093	58.1736	34.6516	50.1567	23.7265	36.1555	51.4504	47.1942	80.174	63.2887	59.985	34.7285	56.3746	-0.642075	0.374178	-1.71596	0.0861691	0.174795
hsa-miR-130a-5p	0	6.51091	0	12.3756	0	0	1.33088	0.584664	1.98295	0.74929	1.67753	1.31354	3.14775	1.27314	1.6555	0.965642	1.7144	0.0864555	0.174992
hsa-miR-6511a-3p	0	29.6608	0	0	14.8613	0	15.3051	33.6182	27.7613	19.4815	20.2829	41.5954	7.42035	26.3407	-1.32619	0.774224	-1.71293	0.0867258	0.175156
hsa-miR-34b-5p	0	47.0233	3.87824	4.95023	18.5766	0	6.43257	11.9856	8.72498	2.24787	3.35506	3.94062	12.4047	6.11445	1.30274	0.768451	1.69529	0.0900213	0.181416
hsa-miR-1304-3p	45.7062	177.242	147.373	178.208	269.36	39.5442	146.396	99.9776	81.3009	87.2923	93.4843	72.2447	142.906	96.7827	0.653823	0.386771	1.69047	0.090939	0.182741
hsa-miR-30a-3p	411.356	750.202	519.684	636.105	743.063	782.974	1078.67	909.153	966.489	868.053	553.738	752.658	640.564	854.794	-0.390485	0.231089	-1.68976	0.091074	0.182741
hsa-miR-6757-5p	0	0	0	0	0	0	1.10906	1.75399	5.55226	3.74645	2.89756	2.62708	0	2.94773	-1.87164	1.11046	-1.68547	0.0918978	0.183995
hsa-miR-21-5p	67828	237199	50161.1	36621.8	102650	87977.8	121608	60868.2	18737.7	32952.7	34559	53721.4	97073.1	53741.2	0.838937	0.498519	1.68286	0.0924028	0.184606
hsa-miR-1290	0	0	0	0	0	15.8177	0	0	0	0	0.152503	0	2.63628	0.0254172	3.05725	1.81936	1.68039	0.0928806	0.184762
hsa-miR-299-5p	22.8531	12.2984	23.2694	14.8507	14.8613	7.90883	7.54163	5.84664	7.9318	9.74077	12.5052	10.0705	16.007	8.93943	0.728316	0.433314	1.6808	0.092801	0.184762
hsa-miR-4667-5p	0	2.89374	15.513	27.2263	0	0	1.33088	2.04632	4.75908	4.87039	3.35506	2.62708	7.60549	3.1648	1.40125	0.835968	1.6762	0.0936982	0.185989
hsa-miR-1910-5p	22.8531	55.7045	19.3912	101.48	50.1567	15.8177	73.8636	94.7156	87.6463	107.148	73.8114	46.6307	44.2338	80.636	-0.702681	0.419652	-1.67444	0.0940445	0.186277
hsa-miR-1293	45.7062	7.95778	0	0	27.8648	23.7265	14.6396	31.5719	28.1579	26.5998	36.1432	34.152	17.5426	28.5441	-1.0638	0.635897	-1.67291	0.0943449	0.186472
hsa-miR-1249-5p	0	0	0	24.7512	0	0	0.221813	0	1.98295	0.374645	0	1.09462	4.12519	0.612337	2.49716	1.50001	1.66476	0.0959609	0.189262
hsa-miR-5002-5p	0	2.1703	0	0	9.28828	0	0	0.584664	0	0.74929	0.610012	1.09462	1.90976	0.50643	2.17159	1.31176	1.65549	0.0978261	0.19253
hsa-miR-26a-1-3p	0	0.723435	0	12.3756	0	0	0.665438	0	0	0	0.762515	0.875693	2.18317	0.383941	2.41759	1.46242	1.65314	0.098302	0.192794
hsa-miR-92a-1-5p	45.7062	47.0233	100.834	391.068	78.0216	79.0883	64.1039	133.596	588.936	265.249	391.628	113.621	123.624	259.522	-1.00646	0.60895	-1.65277	0.098377	0.192794
hsa-miR-6511b-3p	0	6.51091	0	4.95023	13.0036	23.7265	11.5343	17.8323	13.4841	12.3633	11.7427	21.2356	8.03187	14.6987	-0.865402	0.524409	-1.65024	0.098893	0.193395
hsa-miR-501-3p	297.091	480.361	112.469	235.136	195.054	450.803	237.783	664.763	403.332	769.896	497.465	265.116	295.152	473.059	-0.676147	0.411047	-1.64494	0.0999822	0.195113
hsa-miR-4773	0	0	3.87824	9.90046	0	0	0.443625	0.292332	0	0.74929	0.457509	1.53246	2.29645	0.579203	2.06308	1.25501	1.64387	0.100202	0.195131
hsa-miR-597-5p	0	0	0	12.3756	0	0	0.665438	0	0.39659	0	0	0	2.0626	0.177005	2.85283	1.7529	1.62749	0.103632	0.201387
hsa-miR-500b-5p	0	6.51091	23.2694	0	7.43063	7.90883	1.99631	3.21565	0.79318	6.36897	5.1851	2.18923	7.51997	3.29141	1.24124	0.763491	1.62574	0.104005	0.201686
hsa-miR-409-5p	388.503	257.543	112.469	128.706	213.63	545.709	580.927	399.033	373.191	673.986	246.75	281.316	274.427	425.867	-0.668111	0.412552	-1.61946	0.105348	0.203822
hsa-miR-494-5p	0	3.61717	42.6606	27.2263	1.85766	0	25.0648	29.8179	34.5033	25.8505	22.8754	36.5602	12.5603	29.112	-1.04358	0.64477	-1.61854	0.105547	0.203822
hsa-miR-6772-3p	0	0.723435	0	0	0	0	1.7745	2.04632	2.77613	6.36897	1.52503	4.59739	0.120572	3.18139	-1.70203	1.05492	-1.61342	0.106654	0.205531
hsa-miR-6763-5p	0	2.89374	0	9.90046	0	0	0	0.876996	1.18977	0.74929	0.457509	1.09462	2.13237	0.72803	1.8754	1.17158	1.60074	0.109436	0.210453
hsa-miR-153-3p	0	0.723435	0	0	0	7.90883	0	0	0	0	0	0	1.43871	0	2.98169	1.86994	1.59454	0.110815	0.212223
hsa-miR-3928-3p	0	10.8515	7.75648	12.3756	11.1459	15.8177	8.87251	17.8323	24.5886	14.6112	20.8929	24.3005	9.65786	18.5163	-0.763382	0.478507	-1.59534	0.110636	0.212223
hsa-miR-10399-3p	0	0.723435	0	0	0	0	1.99631	4.96964	2.77613	2.62252	2.13504	3.06493	0.120572	2.92743	-1.61165	1.01519	-1.58754	0.112391	0.214796
hsa-miR-1296-3p	0	0.723435	0	7.42535	0	0	0	0	0.79318	0	0	0	1.35813	0.132197	2.82748	1.78498	1.58404	0.113185	0.215561
hsa-miR-218-5p	68.5593	152.645	221.06	14.8507	271.218	94.906	143.735	70.1597	52.7464	38.2138	87.5367	74.6529	137.206	77.8407	0.839514	0.530089	1.58372	0.113257	0.215561
hsa-miR-758-3p	571.328	620.707	597.249	722.734	627.888	434.986	931.613	714.167	575.848	849.32	641.275	770.829	595.815	747.175	-0.31115	0.196749	-1.58146	0.113774	0.2161
hsa-miR-10b-3p	22.8531	13.7453	23.2694	24.7512	0	7.90883	16.6359	7.01597	3.56931	4.87039	4.57509	2.846	15.4213	6.58545	1.1006	0.697589	1.57772	0.11463	0.21728
hsa-miR-4743-5p	0	0.723435	0	0	0	0	1.99631	2.33866	3.56931	4.49574	1.98254	3.06493	0.120572	2.90791	-1.59579	1.01438	-1.57318	0.115678	0.218818
hsa-miR-32-5p	0	10.8515	0	0	1.85766	0	1.99631	0.292332	0	0	0.152503	0	2.1182	0.406858	2.39345	1.52563	1.56883	0.116688	0.220279
hsa-miR-224-3p	22.8531	2.1703	0	2.47512	16.7189	47.453	22.4031	17.8323	23.0022	16.4844	25.468	53.1984	15.2784	26.398	-1.11375	0.711641	-1.56505	0.117571	0.221493
hsa-miR-19b-1-5p	0	0	0	0	9.28828	0	0	0.876996	0.39659	0.374645	0.457509	0.218923	1.54805	0.387444	2.22555	1.42435	1.5625	0.11817	0.22217
hsa-miR-887-5p	22.8531	3.61717	3.87824	17.3258	18.5766	79.0883	32.1628	38.0032	43.2283	44.9574	40.7183	32.4007	24.2232	38.5784	-0.898705	0.576992	-1.55757	0.119335	0.223904
hsa-miR-1285-5p	45.7062	11.575	31.0259	7.42535	3.71531	7.90883	8.20707	3.80032	10.7079	10.4901	5.1851	4.81631	17.8928	7.20113	0.914079	0.589526	1.55053	0.121014	0.226594
hsa-miR-15b-3p	0	5.06404	0	9.90046	31.5802	7.90883	9.75976	3.50798	3.17272	3.37181	5.3376	0.65677	9.07558	4.30111	1.24335	0.804201	1.54607	0.122088	0.228145
hsa-miR-24-2-5p	205.678	468.062	182.277	212.86	198.769	213.538	278.375	195.278	109.062	140.117	114.682	202.723	246.864	173.373	0.53346	0.345769	1.54282	0.122874	0.229149
hsa-miR-664a-3p	0	18.0859	0	32.1765	0	7.90883	5.98894	7.60063	2.77613	2.24787	4.27008	4.59739	9.6952	4.58017	1.24979	0.812331	1.53852	0.123921	0.230638
hsa-miR-218-1-3p	0	5.78748	27.1477	22.276	0	23.7265	5.98894	3.50798	12.6909	2.62252	7.32014	4.59739	13.1563	6.12131	1.09128	0.711144	1.53454	0.124896	0.231985
hsa-miR-365a-3p	0	28.9374	7.75648	22.276	20.4342	31.6353	59.6676	27.4792	25.3817	21.3548	37.3632	32.6196	18.5066	33.9777	-0.673892	0.440366	-1.5303	0.125943	0.232846
hsa-miR-365b-3p	0	28.9374	7.75648	22.276	20.4342	31.6353	59.6676	27.4792	25.3817	21.3548	37.3632	32.6196	18.5066	33.9777	-0.673892	0.440366	-1.5303	0.125943	0.232846
hsa-miR-6847-5p	0	0	0	2.47512	0	7.90883	1.10906	4.96964	3.9659	5.61968	6.10012	3.28385	1.73066	4.17471	-1.48084	0.968118	-1.5296	0.126115	0.232846
hsa-miR-18a-3p	0	11.575	31.0259	14.8507	18.5766	0	5.76713	7.3083	11.1045	11.614	11.4377	5.25416	12.6714	8.74764	0.781024	0.511297	1.52753	0.126628	0.232865
hsa-miR-668-5p	45.7062	0	0	0	0	15.8177	0	0	0.79318	0	0	0	10.254	0.132197	2.88383	1.88705	1.52822	0.126457	0.232865
hsa-miR-224-5p	1965.37	1277.59	1248.79	428.195	2017.41	1708.31	3020.42	1545.27	2283.96	742.921	2611.61	3144.61	1440.94	2224.8	-0.624997	0.40971	-1.52546	0.127144	0.233349
hsa-miR-126-3p	45.7062	61.492	3.87824	7.42535	7.43063	23.7265	77.8562	46.1885	26.1749	43.8335	29.8906	46.6307	24.9432	45.0957	-0.895035	0.590505	-1.51571	0.129592	0.236436
hsa-miR-4746-5p	22.8531	8.68122	0	24.7512	26.0072	23.7265	21.7376	17.5399	47.5908	24.3519	35.2282	24.5194	17.6699	28.4946	-0.770303	0.507743	-1.51711	0.129238	0.236436
hsa-miR-6514-5p	45.7062	2.89374	0	7.42535	0	0	4.43625	10.2316	10.3113	9.36613	9.30268	14.4489	9.33755	9.68283	-1.22179	0.805852	-1.51615	0.129481	0.236436
hsa-miR-6865-5p	22.8531	0.723435	0	0	0	0	2.21813	4.96964	5.94885	3.37181	2.44005	3.28385	3.92943	3.70539	-1.49362	0.99034	-1.50819	0.131506	0.239454
hsa-miR-532-5p	434.209	957.104	449.876	1433.09	886.102	521.983	318.523	770.003	368.035	604.302	686.111	510.31	780.394	542.881	0.53694	0.35666	1.50547	0.132204	0.23993
hsa-miR-7114-5p	0	0	0	0	18.5766	0	1.33088	0.584664	0	0	0.762515	1.31354	3.09609	0.665266	2.16615	1.43916	1.50515	0.132286	0.23993
hsa-miR-15a-3p	0	0	0	12.3756	0	0	0.443625	0.876996	0	0	0	0	2.0626	0.220104	2.63234	1.75285	1.50174	0.133163	0.24018
hsa-miR-671-5p	91.4125	20.9796	116.347	230.186	63.1603	126.541	88.5032	56.4201	72.5759	56.5714	54.596	70.7122	108.104	66.5632	0.684199	0.455491	1.50211	0.133068	0.24018
hsa-miR-6741-3p	0	0	0	19.8009	0	0	1.33088	0.584664	1.18977	0	0.915018	0	3.30015	0.670054	2.18568	1.45557	1.50159	0.133202	0.24018
hsa-miR-6832-5p	0	0	0	0	0	7.90883	2.88356	4.38498	1.98295	2.99716	3.35506	2.18923	1.31814	2.96549	-1.49114	0.997598	-1.49474	0.134984	0.242918
hsa-miR-4426	22.8531	0	0	0	0	0	0	0	0	0	0	0	3.80885	0	2.78549	1.87136	1.48848	0.136624	0.244443
hsa-miR-4721	0	2.1703	0	4.95023	0	0	0	0.292332	0	1.12394	0.305006	0	1.18676	0.286879	2.29296	1.53929	1.48962	0.136323	0.244443
hsa-miR-5009-3p	22.8531	0	0	0	0	0	0	0	0	0	0	0	3.80885	0	2.78549	1.87136	1.48848	0.136624	0.244443
hsa-miR-4734	0	0	0	9.90046	0	0	0	0.292332	0.79318	0.374645	0.610012	0	1.65008	0.345028	2.27586	1.53929	1.47852	0.13927	0.248696
hsa-miR-1909-5p	0	1.44687	0	9.90046	0	0	0.443625	1.16933	0.39659	0.374645	1.67753	0.218923	1.89122	0.713441	1.70232	1.15926	1.46845	0.141981	0.252563
hsa-miR-450a-2-3p	0	5.06404	0	0	9.28828	0	7.76344	12.5703	9.51816	2.62252	11.1327	9.19478	2.39205	8.80031	-1.16418	0.792576	-1.46885	0.141873	0.252563
hsa-miR-34a-3p	45.7062	36.1717	27.1477	4.95023	40.8684	15.8177	21.7376	19.8786	6.74203	16.4844	13.5728	21.8923	28.4437	16.718	0.706586	0.484646	1.45794	0.144857	0.257183
hsa-miR-6866-5p	0	3.61717	0	2.47512	0	0	5.10169	6.13897	5.94885	1.12394	7.32014	6.34878	1.01538	5.33039	-1.32613	0.911593	-1.45474	0.145741	0.258258
hsa-miR-1233-3p	0	0.723435	0	0	0	0	1.99631	3.50798	1.58636	2.24787	4.11758	2.62708	0.120572	2.68053	-1.50103	1.03466	-1.45074	0.146852	0.259729
hsa-miR-342-3p	251.384	434.784	651.544	1353.89	507.14	1051.87	425.215	358.107	379.536	837.706	453.544	450.325	708.436	484.072	0.557214	0.385034	1.44718	0.147846	0.260988
hsa-miR-339-3p	342.797	627.218	876.482	1121.23	614.884	601.071	559.19	577.356	540.552	494.157	560.448	605.98	697.28	556.28	0.356101	0.246754	1.44314	0.14898	0.262379
hsa-miR-485-3p	0	40.5124	0	44.5521	13.0036	23.7265	38.5954	30.4025	44.4181	61.8164	29.4331	40.9387	20.2991	40.934	-0.761408	0.527891	-1.44236	0.149201	0.262379
hsa-miR-3117-3p	22.8531	42.6827	15.513	7.42535	18.5766	15.8177	0.665438	19.2939	11.5011	11.614	9.15018	12.9165	20.4781	10.8569	0.937713	0.655544	1.43044	0.152592	0.267664
hsa-miR-548al	0	0	0	0	0	0	1.7745	2.92332	2.77613	1.49858	1.83004	3.28385	0	2.34774	-1.5857	1.10907	-1.42976	0.152785	0.267664
hsa-miR-579-5p	0	0	0	4.95023	0	0	2.21813	2.33866	5.15567	2.62252	5.1851	5.47308	0.825038	3.83219	-1.38903	0.972622	-1.42813	0.153254	0.267977
hsa-miR-497-5p	0	16.639	11.6347	0	1.85766	23.7265	9.53794	13.7396	18.6397	18.7323	19.5204	23.6437	8.97631	17.3023	-0.866442	0.609222	-1.42221	0.154965	0.270458
hsa-miR-128-3p	594.181	1014.98	795.039	769.761	1053.29	545.709	811.834	717.675	429.903	672.488	642.8	554.533	795.493	638.206	0.339512	0.240958	1.40901	0.158833	0.276149
hsa-miR-361-3p	45.7062	53.5342	31.0259	4.95023	22.2919	31.6353	31.0538	49.6964	57.9021	55.4475	44.6834	42.0333	31.524	46.8027	-0.60708	0.43062	-1.40978	0.158605	0.276149
hsa-miR-4748	0	0	0	0	0	0	1.10906	1.75399	3.9659	1.87323	4.11758	1.75139	0	2.42852	-1.61056	1.14398	-1.40786	0.159172	0.276149
hsa-miR-6799-5p	0	0	0	7.42535	0	0	0.443625	0.584664	0.39659	0	0.457509	0.437847	1.23756	0.386706	1.96334	1.39538	1.40702	0.15942	0.276149
hsa-miR-376a-2-5p	22.8531	11.575	11.6347	0	0	0	3.549	1.75399	0	1.12394	0.610012	5.03524	7.67713	2.01203	1.46089	1.04023	1.40439	0.160203	0.276661
hsa-miR-548q	0	0	0	0	0	0	1.10906	1.16933	7.9318	1.12394	2.13504	2.62708	0	2.68271	-1.69263	1.20556	-1.40402	0.160314	0.276661
hsa-miR-549a-5p	22.8531	352.313	93.0777	34.6516	213.63	63.2707	31.7192	178.03	85.2668	19.8562	66.1863	55.8254	129.966	72.814	0.873974	0.62487	1.39865	0.161918	0.278909
hsa-miR-762	0	0	0	0	0	15.8177	0	0.584664	0	0	0	0	2.63628	0.097444	2.52376	1.82165	1.38543	0.165921	0.285274
hsa-miR-4714-3p	0	0.723435	0	7.42535	0	0	0.221813	0	1.18977	0	0.305006	0.875693	1.35813	0.432047	1.94473	1.41277	1.37654	0.168654	0.289435
hsa-miR-16-2-3p	68.5593	167.837	93.0777	66.8281	169.047	126.541	116.895	78.6373	82.8873	101.529	92.2643	78.1556	115.315	91.7281	0.406661	0.297286	1.36791	0.17134	0.293423
hsa-miR-29b-2-5p	0	1.44687	0	0	0	7.90883	2.88356	2.92332	3.17272	4.87039	3.20256	3.28385	1.55928	3.3894	-1.18535	0.867534	-1.36634	0.171831	0.293423
hsa-miR-4662a-5p	0	4.34061	0	0	16.7189	0	3.549	0.292332	0	1.87323	0.762515	0	3.50992	1.07951	1.80863	1.32499	1.36502	0.172247	0.293423
hsa-miR-636	22.8531	0	0	0	5.57297	0	4.21444	3.80032	10.3113	5.24503	6.25262	3.50277	4.73768	5.55442	-1.26874	0.929339	-1.36521	0.172187	0.293423
hsa-miR-1908-5p	0	0	65.93	12.3756	0	0	1.7745	1.46166	12.2943	2.99716	3.50757	5.47308	13.0509	4.58471	1.46288	1.07658	1.35882	0.174205	0.296213
hsa-miR-1267	0	0	0	0	3.71531	7.90883	1.10906	0	0	0	0	0	1.93736	0.184844	2.35861	1.74792	1.34938	0.177214	0.300775
hsa-miR-3154	0	0.723435	11.6347	2.47512	0	0	0.221813	0.292332	1.98295	0.374645	1.67753	1.09462	2.47221	0.940648	1.47553	1.0961	1.34616	0.178251	0.301982
hsa-miR-4485-5p	22.8531	0	0	0	0	0	0.443625	0	0	0.374645	0.152503	0	3.80885	0.161796	2.10158	1.56578	1.34219	0.179534	0.3036
hsa-miR-3177-5p	0	0	0	0	0	0	1.33088	2.33866	5.15567	2.24787	1.67753	1.31354	0	2.34402	-1.54621	1.15302	-1.34101	0.179917	0.303691
hsa-miR-548ag	0	3.61717	0	14.8507	50.1567	0	12.4215	4.38498	0.79318	6.74361	5.64261	3.94062	11.4374	5.65442	1.17954	0.883053	1.33576	0.181629	0.306024
hsa-miR-6866-3p	22.8531	0	0	0	0	0	0	0	0	0	0.457509	0.218923	3.80885	0.112739	2.23405	1.67423	1.33437	0.182081	0.306227
hsa-miR-7974	0	0	0	7.42535	0	7.90883	4.43625	9.06229	7.9318	6.36897	6.25262	1.53246	2.5557	5.93073	-1.23731	0.928352	-1.3328	0.182597	0.306538
hsa-miR-152-3p	1119.8	1581.43	1023.85	928.168	1235.34	1352.41	1809.99	1695.82	1185.41	1147.16	1125.78	2096.19	1206.83	1510.06	-0.318855	0.240641	-1.32502	0.185163	0.310283
hsa-miR-3913-3p	0	0	0	7.42535	0	0	0.443625	0.584664	0	0	0	0	1.23756	0.171382	2.39281	1.81094	1.32131	0.186399	0.311789
hsa-miR-1303	45.7062	5.06404	19.3912	12.3756	9.28828	7.90883	7.76344	21.9249	44.8146	15.7351	28.9756	10.7272	16.6224	21.6568	-0.798817	0.610058	-1.30941	0.190395	0.317325
hsa-miR-2114-5p	22.8531	10.1281	0	22.276	3.71531	0	5.54532	4.96964	7.13862	4.1211	3.50757	5.47308	9.82876	5.12589	0.802892	0.613069	1.30963	0.190322	0.317325
hsa-miR-589-5p	297.091	446.359	469.267	608.878	678.045	308.444	391.499	581.156	780.489	702.834	723.016	512.5	468.014	615.249	-0.357498	0.273698	-1.30618	0.191492	0.318579
hsa-miR-449c-5p	0	2.1703	0	2.47512	0	0	5.76713	4.96964	1.58636	4.87039	4.42259	1.97031	0.774237	3.93107	-1.20664	0.925979	-1.3031	0.192541	0.319749
hsa-miR-4787-3p	0	0	0	22.276	0	0	0	2.04632	0.79318	1.49858	1.37253	1.31354	3.71267	1.17069	1.71074	1.31523	1.30072	0.193355	0.320526
hsa-miR-26a-5p	65291.4	44490.5	88788.4	96096.3	62928.1	91568.5	90323.7	81440.2	97461.2	77999.6	100046	101150	74860.5	91403.5	-0.287096	0.221775	-1.29454	0.19548	0.32289
hsa-miR-767-5p	0	0	0	0	0	0	0.221813	0	3.56931	0.374645	4.72759	13.1354	0	3.67146	-1.90861	1.4738	-1.29503	0.195311	0.32289
hsa-miR-1249-3p	22.8531	2.89374	7.75648	0	0	0	0.443625	0.292332	1.18977	1.12394	3.05006	0.65677	5.58389	1.12608	1.30997	1.01718	1.28786	0.197796	0.325555
hsa-miR-4458	0	0	0	0	0	0	0.887251	1.16933	5.94885	2.99716	2.28754	1.09462	0	2.39746	-1.54824	1.20211	-1.28793	0.197769	0.325555
hsa-miR-2355-3p	0	5.78748	19.3912	14.8507	5.57297	7.90883	8.20707	6.72364	3.9659	4.87039	6.10012	5.03524	8.91853	5.81706	0.687347	0.536635	1.28085	0.200247	0.327867
hsa-miR-328-5p	0	0	0	39.6018	13.0036	0	3.32719	4.38498	6.34544	0.74929	4.88009	3.7217	8.76757	3.90145	1.27941	0.998917	1.2808	0.200265	0.327867
hsa-miR-585-5p	0	0	0	0	0	0	3.77081	1.16933	0	2.24787	4.72759	5.03524	0	2.82514	-1.70181	1.32856	-1.28094	0.200213	0.327867
hsa-miR-539-5p	22.8531	30.3843	31.0259	2.47512	29.7225	15.8177	31.941	28.6485	26.9681	38.2138	33.2456	40.063	22.0464	33.18	-0.52575	0.411098	-1.27889	0.200935	0.328384
hsa-miR-616-3p	0	4.34061	3.87824	9.90046	1.85766	0	2.21813	10.524	21.4158	2.99716	8.54016	9.19478	3.32949	9.14834	-1.01273	0.793572	-1.27616	0.201897	0.329374
hsa-miR-324-5p	91.4125	25.3202	62.0518	47.0272	27.8648	7.90883	32.8283	46.1885	79.318	47.5799	57.4936	64.1445	43.5976	54.5921	-0.507364	0.398661	-1.27267	0.203135	0.330809
hsa-miR-183-5p	0	6.51091	0	0	5.57297	0	3.10538	6.4313	17.0534	7.86755	6.86263	4.15954	2.01398	7.57996	-1.08883	0.856966	-1.27056	0.203885	0.331447
hsa-miR-129-5p	0	0	0	0	0	0	0.221813	0.876996	4.36249	3.37181	2.44005	3.7217	0	2.49914	-1.58261	1.24828	-1.26783	0.20486	0.331866
hsa-miR-6836-5p	0	0.723435	0	2.47512	0	7.90883	2.66175	5.26198	4.36249	2.24787	2.89756	3.7217	1.85123	3.52556	-1.10354	0.8699	-1.26858	0.204591	0.331866
hsa-miR-1292-5p	0	2.1703	19.3912	29.7014	14.8613	23.7265	3.549	7.01597	15.467	9.36613	7.47264	11.384	14.9751	9.04246	0.778004	0.615756	1.26349	0.206412	0.333795
hsa-miR-378g	0	2.89374	19.3912	0	0	0	0.443625	2.63099	2.37954	0.374645	1.37253	2.18923	3.71416	1.56509	1.31519	1.04602	1.25734	0.208632	0.335706
hsa-miR-532-3p	0	32.5546	0	4.95023	24.1495	15.8177	9.53794	42.6805	20.2261	25.4759	41.9383	26.2708	12.912	27.6882	-0.801875	0.638314	-1.25624	0.20903	0.335706
hsa-miR-542-5p	68.5593	68.0029	147.373	220.285	141.182	110.724	88.9469	116.348	96.3713	35.9659	104.465	118.219	126.021	93.3859	0.473628	0.377033	1.2562	0.209045	0.335706
hsa-miR-580-3p	0	1.44687	0	0	11.1459	0	2.66175	1.16933	0	0	0.305006	0.437847	2.0988	0.762322	1.70423	1.35653	1.25631	0.209002	0.335706
hsa-miR-4787-5p	0	0	0	0	0	7.90883	0	0	0.39659	0	0	0	1.31814	0.0660983	2.36469	1.88484	1.25458	0.209631	0.336063
hsa-miR-3934-5p	0	0	0	19.8009	16.7189	0	4.21444	1.16933	4.75908	3.74645	2.89756	1.31354	6.08664	3.01673	1.21198	0.9719	1.24702	0.21239	0.339897
hsa-miR-192-3p	0	0	0	0	0	7.90883	0.221813	0.292332	0.39659	0	0.305006	0.218923	1.31814	0.239111	1.75363	1.41001	1.24371	0.213608	0.341256
hsa-miR-500a-5p	22.8531	19.5327	23.2694	0	9.28828	7.90883	3.99263	8.47763	7.13862	10.1154	11.8952	3.50277	13.8087	7.52038	0.766339	0.618606	1.23882	0.215414	0.343548
hsa-miR-6729-5p	0	0	0	12.3756	0	7.90883	0	1.16933	1.98295	0.74929	1.06752	1.97031	3.38073	1.15657	1.48746	1.20525	1.23415	0.217146	0.345715
hsa-miR-1538	45.7062	15.1921	0	24.7512	14.8613	0	10.2034	25.7252	28.1579	16.1097	22.4179	35.4656	16.7518	23.0133	-0.666569	0.541947	-1.22995	0.218715	0.3473
hsa-miR-4467	0	0	0	0	0	0	1.55269	4.67731	3.17272	4.87039	2.44005	0	0	2.78553	-1.65743	1.34808	-1.22948	0.218893	0.3473
hsa-miR-3200-3p	22.8531	8.68122	15.513	24.7512	7.43063	0	14.196	18.4169	15.8636	25.1012	21.8079	14.4489	13.2048	18.3058	-0.568059	0.463792	-1.22481	0.220645	0.348884
hsa-miR-7976	0	3.61717	7.75648	0	0	0	7.98526	4.38498	3.17272	7.4929	5.49011	3.28385	1.89561	5.30164	-1.00031	0.816389	-1.22529	0.220467	0.348884
hsa-miR-320c	137.119	96.2168	232.694	89.1041	130.036	181.903	33.2719	63.1437	138.41	113.143	93.4843	163.536	144.512	100.831	0.498688	0.408831	1.21979	0.222544	0.351286
hsa-miR-598-5p	0	0.723435	0	0	0	7.90883	0.665438	0	0.39659	0.74929	0.152503	0.218923	1.43871	0.363791	1.55867	1.29981	1.19916	0.230467	0.363027
hsa-miR-769-3p	0	4.34061	0	14.8507	0	0	4.87988	6.4313	7.9318	11.2394	8.69267	10.9462	3.19855	8.35353	-0.902413	0.753025	-1.19838	0.230767	0.363027
hsa-miR-433-5p	0	13.0218	3.87824	12.3756	13.0036	15.8177	19.9631	20.4632	9.91475	16.1097	12.9627	20.7977	9.68282	16.7019	-0.552338	0.463747	-1.19103	0.23364	0.366922
hsa-miR-3129-3p	0	36.1717	0	2.47512	50.1567	15.8177	20.4068	41.5111	32.5204	25.1012	49.2584	47.2874	17.4369	36.0142	-0.782036	0.658788	-1.18708	0.235195	0.368737
hsa-miR-4517	0	0	0	12.3756	0	0	1.7745	0	0.39659	0	0	0	2.0626	0.361848	2.0882	1.77849	1.17414	0.240339	0.376164
hsa-miR-4745-5p	0	18.0859	38.7824	54.4525	22.2919	23.7265	6.43257	18.1246	21.4158	20.9801	35.8382	11.384	26.2232	19.0292	0.597545	0.51408	1.16236	0.24509	0.382953
hsa-miR-5001-3p	0	0.723435	0	19.8009	9.28828	0	1.33088	2.63099	2.37954	3.37181	5.1851	2.846	4.96877	2.95739	1.0042	0.866554	1.15884	0.246522	0.383923
hsa-miR-99a-5p	342.797	401.506	275.355	462.847	332.521	253.083	212.94	294.086	203.847	451.073	230.279	284.819	344.685	279.507	0.314619	0.271506	1.15879	0.246541	0.383923
hsa-miR-378f	0	3.61717	3.87824	0	1.85766	0	1.33088	0.584664	1.18977	0.374645	1.37253	1.31354	1.55884	1.02767	1.13383	0.981723	1.15494	0.248115	0.385725
hsa-miR-6505-5p	0	0	0	0	0	0	0.221813	1.46166	2.77613	2.62252	1.52503	4.81631	0	2.23724	-1.44323	1.25377	-1.15111	0.249686	0.387516
hsa-miR-548s	0	1.44687	0	0	0	0	3.32719	2.63099	0.79318	2.24787	5.49011	1.75139	0.241145	2.70679	-1.25145	1.09326	-1.1447	0.252335	0.390971
hsa-miR-1908-3p	0	2.1703	15.513	0	0	0	5.10169	6.72364	10.3113	5.99432	6.71013	3.06493	2.94721	6.31767	-0.937405	0.821404	-1.14122	0.253777	0.392548
hsa-miR-194-3p	0	0	0	0	0	0	0.443625	0.584664	2.77613	2.62252	2.59255	3.94062	0	2.16002	-1.40771	1.24177	-1.13364	0.256947	0.395468
hsa-miR-4664-3p	0	0	0	0	0	0	0	0.876996	1.98295	3.74645	3.05006	6.12985	0	2.63105	-1.57111	1.3857	-1.1338	0.25688	0.395468
hsa-miR-6509-5p	0	0	0	7.42535	0	7.90883	0.221813	1.75399	0.39659	1.12394	1.06752	1.09462	2.5557	0.943078	1.27611	1.12387	1.13546	0.256182	0.395468
hsa-miR-1468-5p	22.8531	66.556	31.0259	29.7014	13.0036	15.8177	26.3957	54.6661	55.9192	40.087	47.2759	56.7011	29.8263	46.8408	-0.498149	0.442703	-1.12525	0.260485	0.400247
hsa-miR-1226-5p	0	15.9156	0	0	0	47.453	2.88356	4.38498	8.32839	5.24503	3.66007	3.94062	10.5614	4.74044	1.02469	0.913114	1.1222	0.261779	0.401201
hsa-miR-5189-5p	0	0	0	0	0	0	0.665438	0	1.98295	4.87039	4.88009	3.06493	0	2.5773	-1.54856	1.38176	-1.12072	0.262407	0.401201
hsa-miR-625-3p	0	15.1921	3.87824	9.90046	14.8613	7.90883	8.20707	4.67731	5.15567	9.36613	8.84517	7.22447	8.62349	7.24597	0.592519	0.528437	1.12127	0.262174	0.401201
hsa-miR-502-5p	0	7.95778	11.6347	0	1.85766	0	2.21813	2.33866	2.77613	1.12394	4.27008	0.875693	3.57503	2.2671	0.965952	0.867273	1.11378	0.265373	0.405066
hsa-miR-326	0	5.78748	7.75648	24.7512	18.5766	0	8.87251	21.9249	27.3647	10.4901	26.993	15.9814	9.47861	18.6044	-0.653592	0.588105	-1.11135	0.266416	0.405988
hsa-miR-1343-3p	22.8531	10.1281	3.87824	61.8779	5.57297	31.6353	18.1886	30.9872	32.5204	41.211	37.2107	44.4414	22.6576	34.0932	-0.628956	0.575161	-1.09353	0.274161	0.417103
hsa-miR-149-3p	0	0	0	9.90046	0	0	4.43625	3.50798	9.51816	4.1211	5.1851	3.28385	1.65008	5.00874	-1.06346	0.973954	-1.0919	0.274879	0.417509
hsa-miR-3180-5p	0	2.89374	0	0	0	0	1.7745	9.06229	3.56931	1.12394	1.52503	4.15954	0.48229	3.53577	-1.2101	1.12388	-1.07671	0.281609	0.427031
hsa-miR-16-5p	9004.13	8681.22	6593	4054.24	12698.9	8407.09	16004.2	8553.93	6272.86	12235.9	10676.7	8602.15	8239.77	10391	-0.332804	0.30957	-1.07505	0.282351	0.427455
hsa-miR-505-3p	114.266	159.879	131.86	123.756	107.744	47.453	121.332	151.72	209.003	117.639	165.008	117.124	114.16	146.971	-0.30878	0.289136	-1.06794	0.285546	0.431586
hsa-miR-4717-3p	0	0.723435	7.75648	9.90046	0	0	0.221813	1.46166	1.58636	2.62252	1.98254	2.18923	3.0634	1.67735	1.04512	0.979848	1.06661	0.286148	0.431789
hsa-let-7c-3p	0	0.723435	0	4.95023	1.85766	0	1.33088	0.876996	0.39659	0.374645	0.915018	1.09462	1.25522	0.831457	1.11553	1.05254	1.05984	0.289218	0.43571
hsa-miR-145-5p	1142.66	1211.75	3463.27	3093.89	1032.86	1953.48	1165.85	1262.29	2239.54	1328.49	1448.63	1762.11	1982.98	1534.49	0.371072	0.352524	1.05262	0.292517	0.439964
hsa-miR-195-3p	0	0	0	0	0	0	1.10906	2.33866	2.37954	1.87323	2.13504	1.09462	0	1.82169	-1.22166	1.17219	-1.0422	0.297319	0.446461
hsa-miR-4768-5p	0	0.723435	0	0	0	15.8177	0.887251	0.876996	0	0	1.52503	0.218923	2.75685	0.5847	1.39743	1.34379	1.03991	0.29838	0.447328
hsa-miR-1226-3p	0	0	0	0	0	7.90883	1.7745	0.584664	5.15567	1.87323	2.74505	2.40816	1.31814	2.42354	-1.14338	1.10093	-1.03856	0.299012	0.44755
hsa-miR-26b-5p	2719.52	1870.8	5088.25	4979.93	3453.38	4721.57	3822.5	2872.16	3008.93	2607.53	2619.54	3801.6	3805.58	3122.04	0.285773	0.276841	1.03226	0.301949	0.448319
hsa-miR-323b-3p	45.7062	45.5764	15.513	66.8281	169.047	71.1795	78.5217	20.4632	32.1238	75.3037	39.8033	49.2577	68.975	49.2456	0.525568	0.509094	1.03236	0.301904	0.448319
hsa-miR-452-5p	274.237	356.653	224.938	193.059	421.688	363.806	473.126	158.152	132.461	77.9262	223.874	297.955	305.73	227.249	0.427438	0.413806	1.03294	0.301631	0.448319
hsa-miR-551b-5p	0	0	0	0	0	0	1.7745	1.75399	0.79318	3.74645	0.762515	2.62708	0	1.90962	-1.26018	1.21674	-1.0357	0.300341	0.448319
hsa-miR-99a-3p	22.8531	18.0859	31.0259	76.7286	9.28828	23.7265	5.54532	21.6326	21.8124	27.7237	15.4028	31.525	30.2847	20.607	0.576727	0.557041	1.03534	0.300511	0.448319
hsa-miR-487b-5p	0	7.95778	0	0	1.85766	7.90883	3.99263	7.01597	6.34544	8.61684	5.0326	8.75693	2.95405	6.62673	-0.761354	0.739471	-1.02959	0.303202	0.449457
hsa-miR-3199	0	0	0	0	5.57297	0	0.221813	0.876996	0.39659	0.374645	0.762515	0.875693	0.928828	0.584709	1.33678	1.30655	1.02314	0.306243	0.45324
hsa-miR-6884-5p	0	0	0	0	0	0	0.443625	2.33866	1.98295	2.62252	2.28754	1.53246	0	1.86796	-1.23603	1.2094	-1.02201	0.306774	0.4533
hsa-miR-760	22.8531	55.7045	58.1736	138.606	42.7261	15.8177	50.5733	49.9888	131.271	116.889	99.1269	56.7011	55.6469	84.0918	-0.470994	0.464963	-1.01297	0.311074	0.458921
hsa-miR-193a-5p	0	18.0859	31.0259	22.276	29.7225	7.90883	17.3014	34.7875	37.676	17.983	36.6007	30.4303	18.1699	29.1298	-0.425837	0.42291	-1.00692	0.313973	0.46246
hsa-miR-4646-5p	0	0	0	0	0	0	0.665438	0.876996	3.17272	2.24787	1.37253	2.846	0	1.86359	-1.22431	1.22038	-1.00322	0.315756	0.464346
hsa-miR-140-3p	2628.11	4581.51	3118.1	2123.65	2242.19	3029.08	2396.91	4470.93	4141.59	3398.03	3716.04	3010.85	2953.77	3522.39	-0.250476	0.250293	-1.00073	0.316955	0.46537
hsa-miR-6132	0	0	0	17.3258	0	0	0.443625	2.33866	1.98295	0.74929	2.44005	0.875693	2.88763	1.47171	1.18982	1.1935	0.996916	0.318806	0.466933
hsa-miR-6840-3p	0	2.1703	19.3912	0	0	0	1.55269	1.16933	1.18977	0	4.72759	1.31354	3.59358	1.65882	1.15541	1.15952	0.996455	0.319029	0.466933
hsa-miR-6716-3p	0	2.89374	0	14.8507	5.57297	15.8177	9.31613	9.64696	9.12157	16.4844	7.93015	7.22447	6.52251	9.95394	-0.602275	0.605771	-0.994229	0.320111	0.467777
hsa-miR-1247-3p	0	0	0	12.3756	0	0	0	0.292332	0	1.12394	0	2.40816	2.0626	0.637404	1.64954	1.6636	0.991554	0.321415	0.468329
hsa-miR-320d	22.8531	48.4701	85.3212	9.90046	29.7225	71.1795	9.53794	17.5399	48.384	31.8448	29.4331	49.6956	44.5745	31.0726	0.526433	0.531669	0.990152	0.3221	0.468329
hsa-miR-3661	0	12.2984	46.5389	14.8507	24.1495	7.90883	17.3014	22.5096	36.8829	22.1041	45.1409	22.1113	17.6244	27.675	-0.472205	0.47731	-0.989305	0.322514	0.468329
hsa-miR-484	1074.1	551.257	1446.58	2056.82	1131.31	1399.86	628.173	946.279	1069.6	1186.88	1240.46	1124.39	1276.66	1032.63	0.305692	0.30863	0.990479	0.32194	0.468329
hsa-miR-382-5p	45.7062	48.4701	7.75648	66.8281	85.4522	55.3618	52.5696	59.3434	71.7828	95.5345	85.8592	53.6362	51.5958	69.7876	-0.387462	0.395975	-0.978502	0.327826	0.475296
hsa-miR-1234-3p	0	0	0	0	0	0	1.10906	0.876996	1.18977	3.74645	0.457509	4.15954	0	1.92322	-1.24128	1.2745	-0.973935	0.330089	0.477828
hsa-miR-612	0	0	0	0	0	15.8177	0.887251	0	1.18977	0.374645	0	0	2.63628	0.408611	1.57522	1.62428	0.969793	0.33215	0.48006
hsa-miR-379-5p	22.8531	8.68122	0	0	1.85766	0	10.4252	4.67731	1.58636	9.74077	6.71013	8.10016	5.56533	6.87332	-0.774958	0.806602	-0.960769	0.336669	0.485832
hsa-miR-10396a-5p	0	0	0	0	0	0	0.665438	2.04632	4.75908	1.12394	1.37253	1.09462	0	1.84365	-1.19279	1.24562	-0.957588	0.338271	0.486626
hsa-miR-10396b-5p	0	0	0	0	0	0	0.665438	2.04632	4.75908	1.12394	1.37253	1.09462	0	1.84365	-1.19279	1.24562	-0.957588	0.338271	0.486626
hsa-miR-34a-5p	502.769	489.765	608.883	549.476	495.994	743.43	501.075	711.244	675.392	534.993	609.707	835.849	565.053	644.71	-0.193815	0.20265	-0.956403	0.338868	0.486729
hsa-miR-1278	0	0	0	0	7.43063	0	1.33088	0	1.18977	0	0.305006	0	1.23844	0.470942	1.60589	1.68336	0.95398	0.340094	0.487731
hsa-miR-942-5p	22.8531	21.703	7.75648	0	22.2919	23.7265	30.6101	22.5096	18.6397	14.6112	27.1455	17.2949	16.3885	21.8018	-0.480519	0.506706	-0.94832	0.342967	0.49109
hsa-miR-147b-3p	0	1.44687	0	9.90046	9.28828	0	5.10169	0.876996	0.39659	2.99716	0.305006	3.50277	3.43927	2.1967	0.955419	1.01153	0.94453	0.344899	0.493093
hsa-miR-3620-5p	22.8531	5.78748	0	51.9774	22.2919	15.8177	9.53794	34.4952	43.6249	22.1041	33.7031	35.6845	19.7879	29.8583	-0.589187	0.626416	-0.940569	0.346926	0.495226
hsa-miR-5579-3p	0	1.44687	11.6347	0	0	0	1.55269	0.292332	3.17272	0	0	0	2.18026	0.83629	1.43956	1.53454	0.938107	0.34819	0.496264
hsa-miR-5588-5p	0	0	0	0	0	0	0.221813	2.04632	2.37954	2.62252	1.83004	1.75139	0	1.8086	-1.17109	1.25427	-0.933681	0.350468	0.497214
hsa-miR-6720-3p	0	0	0	2.47512	0	0	0	4.09265	4.36249	0.374645	3.35506	4.81631	0.412519	2.83353	-1.21498	1.30069	-0.934106	0.350249	0.497214
hsa-miR-6869-5p	0	2.89374	0	0	0	7.90883	0.887251	0.584664	0.79318	0.374645	1.83004	0.65677	1.80043	0.854424	0.99549	1.06534	0.934431	0.350081	0.497214
hsa-miR-210-5p	0	11.575	11.6347	12.3756	13.0036	47.453	4.21444	5.84664	19.0363	10.4901	10.8277	14.6679	16.007	10.8472	0.510993	0.549596	0.929761	0.352495	0.498572
hsa-miR-6859-5p	0	2.89374	0	7.42535	20.4342	15.8177	2.21813	2.33866	7.53521	9.36613	4.72759	5.25416	7.76183	5.23998	0.673474	0.724365	0.929744	0.352504	0.498572
hsa-miR-200c-3p	0	0	0	0	0	0	1.10906	2.04632	1.58636	1.49858	3.05006	0.875693	0	1.69435	-1.12145	1.21001	-0.926808	0.354026	0.499961
hsa-miR-1243	0	1.44687	0	0	0	7.90883	0	0.292332	0.79318	0	1.37253	0.65677	1.55928	0.519135	1.24488	1.35281	0.920218	0.357459	0.504039
hsa-miR-3622a-5p	0	2.1703	0	0	0	7.90883	1.99631	2.33866	5.94885	1.87323	5.94761	1.09462	1.67986	3.19988	-0.886129	0.967488	-0.915907	0.359716	0.506449
hsa-miR-25-3p	3679.35	2283.88	1915.85	1749.91	2221.76	1708.31	2133.62	1737.04	1808.85	2041.82	2060.92	1939.22	2259.84	1953.58	0.192944	0.212848	0.906486	0.364678	0.512656
hsa-miR-6845-5p	0	0.723435	0	0	0	0	0.443625	2.04632	2.37954	2.99716	1.22002	2.62708	0.120572	1.95229	-1.03209	1.14267	-0.90323	0.366404	0.5143
hsa-let-7a-2-3p	0	8.68122	23.2694	51.9774	5.57297	15.8177	28.1702	24.2636	22.209	44.2081	24.7055	19.7031	17.5531	27.2099	-0.482731	0.538861	-0.895836	0.37034	0.517469
hsa-miR-181a-3p	1759.69	1625.56	2024.44	4504.71	1725.76	2206.56	3360.68	1361.68	1315.49	1769.07	1627.51	1812.69	2307.79	1874.52	0.300453	0.335132	0.896519	0.369976	0.517469
hsa-miR-3157-5p	0	0	7.75648	0	0	0	0.221813	1.16933	0	0	0	1.09462	1.29275	0.414293	1.4994	1.67022	0.897726	0.369332	0.517469
hsa-miR-3065-3p	22.8531	2.89374	0	0	7.43063	0	6.21075	5.55431	4.75908	5.61968	5.79511	4.15954	5.52958	5.34975	-0.623002	0.69818	-0.892322	0.37222	0.519312
hsa-miR-4421	0	0	11.6347	0	0	0	1.33088	0.292332	0.79318	0	2.28754	0	1.93912	0.783989	1.35119	1.5174	0.890466	0.373215	0.519916
hsa-miR-204-5p	45.7062	47.0233	139.617	4.95023	27.8648	0	6.43257	154.936	51.9533	70.4333	112.09	36.998	44.1935	72.1405	-0.671205	0.758654	-0.884731	0.376302	0.523427
hsa-miR-425-5p	868.418	885.484	515.806	499.973	585.162	537.801	947.14	671.487	696.412	696.84	637.462	751.345	648.774	733.448	-0.194001	0.220033	-0.881692	0.377944	0.524922
hsa-miR-34c-5p	319.944	978.807	519.684	180.683	522.001	379.624	389.947	585.249	397.383	217.294	385.68	355.969	483.457	388.587	0.332429	0.380969	0.872588	0.382888	0.530991
hsa-miR-148a-5p	251.384	201.115	407.215	697.982	328.805	466.621	171.905	235.62	283.562	323.693	429.143	467.62	392.187	318.59	0.309836	0.355594	0.87132	0.38358	0.531154
hsa-miR-5094	0	0	0	0	7.43063	0	1.33088	1.46166	0	0	0.457509	0	1.23844	0.541674	1.45356	1.67086	0.869947	0.384329	0.531397
hsa-miR-6826-5p	0	2.89374	0	0	9.28828	0	0	3.21565	1.58636	0.374645	1.37253	1.75139	2.03034	1.38343	1.02629	1.18941	0.862853	0.388218	0.535973
hsa-miR-1273h-5p	0	0	7.75648	0	0	7.90883	0.221813	0	0.39659	4.1211	0.457509	0.875693	2.61088	1.01212	1.13879	1.32251	0.861079	0.389194	0.53652
hsa-miR-6819-5p	0	1.44687	0	0	1.85766	0	1.33088	4.96964	4.36249	1.87323	0.915018	2.62708	0.550754	2.67972	-0.877168	1.02198	-0.8583	0.390727	0.537831
hsa-miR-6721-5p	0	0	0	0	0	7.90883	1.33088	2.92332	1.98295	2.24787	2.28754	1.09462	1.31814	1.97786	-0.908579	1.06235	-0.855253	0.392411	0.539347
hsa-miR-28-5p	1165.51	1910.59	1264.31	940.544	1983.98	1249.6	1643.41	1310.82	970.059	1324.74	1099.55	1054.55	1419.09	1233.86	0.210232	0.247449	0.849596	0.39555	0.541263
hsa-miR-3170	22.8531	0	0	0	0	0	0	0	0.79318	0.374645	0.152503	0.875693	3.80885	0.366003	1.25899	1.48136	0.84989	0.395386	0.541263
hsa-miR-3622a-3p	0	0	0	0	0	0	0.887251	1.16933	3.56931	1.12394	2.59255	0.65677	0	1.66652	-1.06883	1.25808	-0.849576	0.395561	0.541263
hsa-miR-10392-5p	0	0	0	0	0	0	0.443625	2.33866	1.58636	1.12394	1.67753	2.62708	0	1.63286	-1.05582	1.2451	-0.847983	0.396447	0.541277
hsa-miR-431-3p	479.915	332.78	426.606	834.114	312.086	403.35	335.381	521.813	644.062	601.305	498.532	728.139	464.809	554.872	-0.255657	0.301677	-0.847455	0.396742	0.541277
hsa-miR-663a	0	0	0	0	0	15.8177	1.10906	0.292332	1.58636	0.374645	0.305006	0.437847	2.63628	0.684209	1.06682	1.26304	0.844641	0.398311	0.542619
hsa-miR-660-3p	0	2.1703	3.87824	0	0	0	2.43994	2.63099	1.98295	5.24503	3.05006	2.18923	1.00809	2.92303	-0.766965	0.910902	-0.841984	0.399797	0.543842
hsa-miR-195-5p	0	6.51091	7.75648	9.90046	1.85766	0	3.549	2.92332	1.58636	3.74645	3.96508	6.12985	4.33758	3.65001	0.578686	0.693063	0.834968	0.403736	0.548393
hsa-miR-421	342.797	662.666	492.536	301.964	912.109	640.615	706.03	780.526	433.473	696.091	713.866	706.247	558.781	672.705	-0.244341	0.294281	-0.830297	0.406371	0.549625
hsa-miR-4510	0	0	0	2.47512	5.57297	0	0.443625	4.09265	5.55226	5.99432	3.35506	4.15954	1.34135	3.93291	-0.837719	1.00906	-0.830201	0.406425	0.549625
hsa-miR-6877-5p	0	0	0	4.95023	0	0	0	0.584664	0.39659	1.12394	0.305006	1.09462	0.825038	0.584135	1.17491	1.41366	0.831113	0.40591	0.549625
hsa-miR-4707-3p	0	0	0	12.3756	0	7.90883	0.665438	3.50798	0	0.374645	0	4.15954	3.38073	1.45127	1.16164	1.40702	0.825602	0.40903	0.551811
hsa-miR-548w	22.8531	4.34061	23.2694	0	0	0	5.98894	5.26198	4.36249	1.12394	2.28754	2.846	8.41053	3.64515	0.722932	0.877142	0.82419	0.409831	0.551811
hsa-miR-6875-5p	22.8531	6.51091	0	0	0	0	2.66175	4.67731	5.55226	4.49574	3.96508	7.88124	4.89401	4.87223	-0.678428	0.822117	-0.82522	0.409247	0.551811
hsa-miR-3173-3p	0	0.723435	3.87824	17.3258	0	0	0.887251	1.46166	4.36249	2.62252	3.66007	1.97031	3.65458	2.49405	0.783121	0.955518	0.819577	0.412457	0.553734
hsa-miR-6500-3p	0	1.44687	0	0	0	0	1.99631	0.584664	3.56931	2.24787	4.57509	0.437847	0.241145	2.23518	-0.974606	1.18804	-0.820346	0.412019	0.553734
hsa-miR-3200-5p	0	3.61717	0	0	3.71531	0	0.665438	0.584664	0	1.49858	2.28754	1.09462	1.22208	1.02181	0.973101	1.19217	0.816245	0.41436	0.554679
hsa-miR-410-3p	4867.71	7324.78	1601.71	1529.62	4114.71	3305.89	7680.26	5166.68	2447.75	5026.61	3693.47	4676.2	3790.74	4781.83	-0.332051	0.406756	-0.81634	0.414306	0.554679
hsa-miR-5088-5p	0	1.44687	0	0	0	7.90883	1.10906	5.26198	2.77613	1.49858	2.59255	2.18923	1.55928	2.57126	-0.786977	0.965767	-0.814872	0.415145	0.554927
hsa-miR-3065-5p	0	0	19.3912	0	3.71531	0	2.88356	3.80032	3.17272	0.374645	1.83004	1.53246	3.85108	2.26562	0.844651	1.04746	0.806383	0.420022	0.560635
hsa-miR-185-3p	45.7062	15.9156	77.5648	86.629	16.7189	47.453	37.4863	66.3594	88.8361	52.825	54.4435	67.6473	48.3312	61.2663	-0.372276	0.463332	-0.803476	0.4217	0.562064
hsa-miR-23a-5p	0	0	0	14.8507	0	0	1.10906	2.63099	1.58636	0.74929	0.457509	2.846	2.47512	1.5632	0.950884	1.18754	0.800719	0.423294	0.563377
hsa-miR-6837-3p	0	4.34061	0	9.90046	7.43063	0	2.66175	2.33866	1.98295	5.24503	1.52503	5.47308	3.61195	3.20442	0.614512	0.774547	0.793382	0.427555	0.568231
hsa-miR-3935	0	0	0	2.47512	13.0036	0	1.7745	0.584664	3.17272	0.74929	2.59255	2.40816	2.57979	1.88031	0.841318	1.06893	0.787065	0.431244	0.572311
hsa-miR-582-5p	22.8531	10.8515	3.87824	7.42535	7.43063	0	6.43257	3.21565	4.75908	6.36897	6.55763	7.66232	8.73981	5.8327	0.423395	0.544541	0.777526	0.436848	0.578723
hsa-miR-937-5p	0	0	27.1477	0	0	0	0.443625	3.50798	3.17272	3.74645	1.83004	2.18923	4.52461	2.48167	0.904067	1.16396	0.776715	0.437327	0.578723
hsa-miR-6886-5p	0	5.06404	0	0	1.85766	0	3.10538	4.38498	6.74203	3.37181	4.57509	1.75139	1.15362	3.98844	-0.719317	0.928029	-0.775102	0.438279	0.579155
hsa-miR-379-3p	22.8531	78.131	15.513	22.276	122.605	15.8177	106.692	64.0207	38.8658	81.6726	62.3737	52.1038	46.1993	67.6214	-0.403137	0.522948	-0.770894	0.44077	0.580786
hsa-miR-7111-5p	0	0	0	0	9.28828	0	0	0.292332	1.58636	2.62252	0.762515	0.875693	1.54805	1.02324	1.06915	1.38617	0.771293	0.440533	0.580786
hsa-miR-301a-5p	0	2.89374	7.75648	0	0	0	2.43994	1.75399	0.39659	0	1.52503	1.09462	1.77504	1.20169	0.889524	1.1571	0.768756	0.442038	0.581629
hsa-miR-1273c	0	0	0	0	9.28828	0	0.665438	0.876996	0	2.99716	0.457509	1.31354	1.54805	1.05177	1.0366	1.35399	0.765592	0.443919	0.583274
hsa-miR-4727-3p	0	0	0	0	0	0	0.443625	1.75399	1.58636	1.49858	2.13504	1.53246	0	1.49168	-0.939745	1.24787	-0.753077	0.451404	0.592268
hsa-miR-135b-3p	0	2.1703	0	0	9.28828	0	0.665438	1.75399	0	1.49858	3.66007	1.31354	1.90976	1.48194	0.860517	1.15223	0.74683	0.455166	0.596358
hsa-miR-6513-3p	0	0.723435	0	0	11.1459	0	3.549	1.46166	1.18977	1.12394	1.67753	0.65677	1.97823	1.60978	0.792537	1.06351	0.745211	0.456144	0.596794
hsa-miR-30e-3p	228.531	262.607	228.816	198.009	434.692	150.268	346.028	200.832	203.054	200.435	181.783	180.393	250.487	218.754	0.222382	0.300166	0.740865	0.458775	0.599389
hsa-miR-324-3p	205.678	97.6637	197.79	131.181	172.762	134.45	65.6565	121.025	186.397	135.996	132.983	135.295	156.588	129.559	0.224984	0.305472	0.736513	0.461419	0.601925
hsa-miR-425-3p	22.8531	26.0437	3.87824	34.6516	39.0108	15.8177	19.7413	24.2636	40.4522	35.9659	31.5681	38.7494	23.7092	31.7901	-0.307353	0.417868	-0.735527	0.462018	0.601925
hsa-miR-29c-5p	0	5.06404	15.513	9.90046	0	15.8177	5.54532	5.84664	9.51816	5.61968	2.59255	2.62708	7.71585	5.29157	0.505935	0.689534	0.733734	0.463111	0.6025
hsa-miR-1284	0	2.89374	0	0	0	0	2.43994	3.50798	2.77613	4.49574	1.37253	1.09462	0.48229	2.61449	-0.801909	1.10032	-0.728798	0.466125	0.60557
hsa-miR-296-5p	22.8531	31.1077	31.0259	32.1765	37.1531	63.2707	21.9595	25.4329	23.3988	31.4702	38.4307	39.6251	36.2645	30.0529	0.238946	0.330604	0.722756	0.46983	0.609527
hsa-miR-5010-5p	22.8531	28.9374	62.0518	42.077	33.4378	23.7265	14.6396	49.1118	69.7998	49.4531	36.9057	56.7011	35.5139	46.1019	-0.309324	0.42984	-0.719625	0.471756	0.611168
hsa-miR-219a-1-3p	0	2.1703	11.6347	17.3258	13.0036	0	6.21075	11.1086	20.6227	13.1126	10.9802	9.63263	7.35574	11.9446	-0.432843	0.616453	-0.702151	0.482585	0.623451
hsa-miR-6890-5p	0	0	0	0	0	0	0.887251	2.04632	1.18977	1.49858	2.28754	0.65677	0	1.42771	-0.883044	1.25634	-0.70287	0.482137	0.623451
hsa-miR-597-3p	0	5.06404	0	0	0	0	1.99631	2.92332	5.94885	1.87323	5.0326	2.40816	0.844007	3.36374	-0.741394	1.06568	-0.695698	0.486618	0.627784
hsa-miR-4326	22.8531	0	15.513	4.95023	14.8613	31.6353	40.3699	0	16.6568	37.0899	20.5879	14.0111	14.9688	21.4526	-0.652647	0.939986	-0.694316	0.487484	0.628026
hsa-miR-362-5p	0	12.2984	0	29.7014	13.0036	15.8177	5.54532	12.8626	7.9318	9.74077	17.5378	7.88124	11.8035	10.2499	0.395967	0.573334	0.69064	0.489792	0.630122
hsa-miR-152-5p	274.237	126.601	139.617	324.24	78.0216	71.1795	291.018	225.096	197.502	111.644	164.551	204.255	168.983	199.011	-0.275291	0.399243	-0.689533	0.490488	0.630141
hsa-miR-6824-5p	0	0	0	0	5.57297	0	0.443625	0	3.17272	0	0.152503	0.218923	0.928828	0.664628	1.09775	1.62052	0.677409	0.498147	0.639092
hsa-miR-6804-5p	0	0	0	0	0	0	1.55269	1.16933	1.58636	1.49858	2.59255	0.218923	0	1.4364	-0.871811	1.30529	-0.667907	0.504193	0.645954
hsa-miR-1909-3p	0	0	0	0	0	7.90883	1.7745	2.63099	1.98295	1.12394	0.762515	2.18923	1.31814	1.74402	-0.726504	1.09342	-0.664432	0.506414	0.647508
hsa-miR-2277-5p	0	18.0859	31.0259	54.4525	14.8613	15.8177	14.8614	24.8482	28.9511	10.4901	23.638	19.7031	22.3739	20.4153	0.31034	0.46752	0.663801	0.506818	0.647508
hsa-miR-6855-5p	0	0	0	4.95023	0	0	0.665438	0	0.39659	0	1.22002	1.53246	0.825038	0.635752	1.01624	1.53342	0.662726	0.507506	0.647508
hsa-miR-130a-3p	2422.43	4261.76	3630.03	2316.71	4242.89	1961.39	2982.71	2886.78	2387.47	2338.16	3327.92	2971.88	3139.2	2815.82	0.16216	0.247951	0.653999	0.513112	0.651963
hsa-miR-4660	0	0	3.87824	0	0	0	1.33088	0.584664	1.18977	1.12394	1.52503	5.25416	0.646373	1.83474	-0.764317	1.16805	-0.654352	0.512885	0.651963
hsa-miR-502-3p	137.119	247.415	69.8083	99.0046	111.459	197.721	94.714	234.158	125.322	220.666	205.574	145.584	143.754	171.003	-0.241448	0.36909	-0.654171	0.513002	0.651963
hsa-miR-4786-5p	22.8531	0	0	0	0	0	2.21813	0.876996	1.98295	1.12394	2.59255	1.97031	3.80885	1.79414	-0.746306	1.14439	-0.652143	0.514309	0.652587
hsa-miR-4286	45.7062	66.556	50.4171	254.937	57.5873	86.9972	34.8246	106.117	198.295	11.9886	48.4959	32.4007	93.7001	72.0202	0.405585	0.623207	0.650803	0.515173	0.652788
hsa-miR-7156-5p	0	2.1703	0	0	0	0	1.55269	3.21565	3.9659	1.87323	1.83004	0.65677	0.361717	2.18238	-0.740716	1.14231	-0.648435	0.516704	0.653832
hsa-miR-574-5p	91.4125	139.623	201.668	170.783	217.346	110.724	77.4126	194.108	255.404	204.931	234.855	158.938	155.259	187.608	-0.214218	0.332787	-0.643707	0.519765	0.656807
hsa-miR-548ay-3p	0	0.723435	0	0	0	7.90883	0.221813	0.876996	0	0.74929	0.762515	1.31354	1.43871	0.654026	0.79032	1.23156	0.641725	0.521052	0.657535
hsa-miR-210-3p	731.3	742.244	1636.62	1064.3	1214.91	949.06	702.259	610.389	1299.62	757.907	790.27	1415.12	1056.4	929.262	0.192324	0.301909	0.637028	0.524107	0.659722
hsa-miR-381-3p	5461.89	12798.3	2567.39	3257.25	5225.59	3218.89	8226.14	4347.27	2845.14	4009.08	3302.91	4347.16	5421.55	4512.95	0.262523	0.412949	0.635728	0.524954	0.659722
hsa-miR-548av-3p	22.8531	56.4279	38.7824	17.3258	37.1531	47.453	53.0132	26.6022	24.9852	31.8448	34.0082	25.614	36.6659	32.6779	0.239663	0.377612	0.634679	0.525638	0.659722
hsa-miR-548o-3p	22.8531	56.4279	38.7824	17.3258	37.1531	47.453	53.0132	26.6022	24.9852	31.8448	34.0082	25.614	36.6659	32.6779	0.239663	0.377612	0.634679	0.525638	0.659722
hsa-miR-4725-5p	0	2.1703	0	0	0	0	1.55269	3.21565	2.37954	1.49858	2.59255	1.31354	0.361717	2.09209	-0.694101	1.1045	-0.628429	0.529723	0.663948
hsa-miR-199a-5p	2536.7	3643.22	1462.1	1564.27	2498.55	3669.7	3646.82	2121.16	1649.42	1860.11	1809.29	2333.94	2562.42	2236.79	0.194249	0.309976	0.626657	0.530884	0.664503
hsa-miR-490-3p	799.859	464.445	2594.54	94.0544	588.877	2348.92	751.058	425.343	2053.15	17.2337	872.927	801.04	1148.45	820.125	0.466534	0.749174	0.622732	0.533461	0.666826
hsa-miR-4647	0	0	0	14.8507	0	0	2.66175	3.50798	9.51816	7.4929	3.50757	4.59739	2.47512	5.21429	-0.637262	1.0278	-0.620024	0.535242	0.66815
hsa-miR-345-5p	1211.22	1638.58	1846.04	2376.11	1805.64	2254.02	1280.75	1392.09	1704.15	2299.2	1808.23	1699.5	1855.27	1697.32	0.136917	0.22187	0.617103	0.537167	0.669649
hsa-miR-146b-5p	639.887	1141.58	143.495	133.656	776.5	1170.51	454.716	1887.3	212.969	299.716	1274.92	1067.91	667.604	866.255	-0.367035	0.607533	-0.604141	0.54575	0.674982
hsa-miR-3125	0	2.1703	0	0	0	0	0.221813	1.75399	1.18977	4.49574	2.44005	2.846	0.361717	2.15789	-0.733758	1.21477	-0.60403	0.545823	0.674982
hsa-miR-4763-3p	0	0	0	0	0	7.90883	0.221813	0.876996	0.79318	0	0.152503	1.09462	1.31814	0.523185	0.846608	1.39361	0.607491	0.543525	0.674982
hsa-miR-5001-5p	0	1.44687	23.2694	7.42535	1.85766	0	0.443625	3.80032	7.9318	3.74645	5.49011	4.15954	5.66655	4.26197	0.524301	0.860269	0.609461	0.542219	0.674982
hsa-miR-624-5p	0	5.78748	0	0	0	0	5.98894	2.33866	0.39659	1.87323	4.11758	5.91093	0.96458	3.43765	-0.693933	1.14675	-0.605128	0.545094	0.674982
hsa-miR-6789-5p	0	5.06404	0	0	0	0	1.10906	2.92332	6.74203	2.24787	4.27008	1.75139	0.844007	3.17396	-0.670354	1.10499	-0.606658	0.544078	0.674982
hsa-miR-133a-3p	45.7062	44.853	352.92	195.534	91.0252	142.359	32.1628	147.043	155.067	78.3008	145.183	158.719	145.4	119.413	0.308447	0.519024	0.594283	0.552323	0.682108
hsa-miR-194-5p	68.5593	65.1091	27.1477	9.90046	26.0072	31.6353	63.2166	45.0191	24.5886	43.0842	34.1607	46.6307	38.0599	42.7833	-0.257908	0.43969	-0.586568	0.557494	0.687576
hsa-miR-4512	22.8531	0	0	0	0	0	0.665438	2.33866	1.98295	1.87323	1.83004	1.53246	3.80885	1.70379	-0.665938	1.14655	-0.580817	0.561364	0.691427
hsa-miR-138-1-3p	0	0	0	0	40.8684	0	0.443625	5.84664	0.79318	0	74.5739	26.7086	6.81141	18.061	-0.956374	1.66162	-0.575566	0.564909	0.692107
hsa-miR-2277-3p	22.8531	5.78748	0	17.3258	42.7261	7.90883	10.647	17.2476	26.1749	15.3604	23.943	30.4303	16.1002	20.6339	-0.349665	0.606774	-0.576269	0.564433	0.692107
hsa-miR-302b-3p	22.8531	0	0	0	0	0	0.665438	0.584664	0	0	1.37253	0.437847	3.80885	0.510079	0.826591	1.43559	0.575786	0.56476	0.692107
hsa-miR-378a-5p	0	3.61717	0	0	0	23.7265	1.10906	3.21565	3.56931	2.62252	0.610012	3.50277	4.55728	2.43822	0.566624	0.981956	0.577036	0.563915	0.692107
hsa-miR-4745-3p	22.8531	0	0	0	0	0	0.221813	0.292332	0.39659	0.74929	0.915018	0.875693	3.80885	0.575123	0.714045	1.26622	0.563917	0.572811	0.70086
hsa-miR-4661-5p	0	3.61717	0	4.95023	0	0	1.33088	4.96964	3.56931	2.62252	4.88009	3.50277	1.4279	3.4792	-0.499296	0.894655	-0.558088	0.576784	0.704789
hsa-miR-454-5p	0	49.917	11.6347	9.90046	81.7369	0	42.1444	22.8019	14.6738	21.3548	25.6205	12.6976	25.5315	23.2155	0.359845	0.650444	0.55323	0.580106	0.707913
hsa-miR-432-3p	0	8.68122	7.75648	12.3756	7.43063	15.8177	9.98157	11.6933	7.9318	12.7379	8.69267	15.9814	8.67693	11.1698	-0.263342	0.478639	-0.55019	0.582189	0.708586
hsa-miR-943	0	5.78748	0	0	7.43063	7.90883	3.32719	8.1853	4.36249	7.11826	4.27008	7.22447	3.52116	5.74796	-0.390041	0.707803	-0.551059	0.581593	0.708586
hsa-miR-191-5p	46871.7	37067.4	76796.9	81569.9	50089.8	78953.9	51259.3	49199.5	67234.3	58022.8	51345.8	61667	61891.6	56454.8	0.132243	0.241617	0.547323	0.584157	0.710046
hsa-miR-6779-5p	0	0.723435	0	12.3756	1.85766	0	1.10906	1.16933	1.98295	0.74929	3.96508	4.15954	2.49278	2.18921	0.536942	0.985424	0.544885	0.585833	0.711149
hsa-miR-3180	68.5593	23.1499	69.8083	49.5023	27.8648	0	11.5343	54.6661	51.5567	18.7323	21.8079	26.2708	39.8141	30.7613	0.292809	0.541151	0.541085	0.588449	0.711587
hsa-miR-3180-3p	68.5593	23.1499	69.8083	49.5023	27.8648	0	11.5343	54.6661	51.5567	18.7323	21.8079	26.2708	39.8141	30.7613	0.292809	0.541151	0.541085	0.588449	0.711587
hsa-miR-3613-5p	0	6.51091	0	0	1.85766	0	5.3235	1.46166	0	0.374645	0.152503	0	1.39476	1.21872	0.794521	1.46859	0.541008	0.588502	0.711587
hsa-miR-671-3p	251.384	248.862	453.754	883.616	315.802	458.712	352.682	437.329	554.829	676.234	479.164	502.867	435.355	500.518	-0.180744	0.335399	-0.538893	0.589961	0.71242
hsa-miR-6851-5p	0	8.68122	11.6347	19.8009	0	0	1.55269	6.72364	5.55226	8.99148	7.16764	6.5677	6.68614	6.09257	0.399905	0.746435	0.535753	0.592129	0.714106
hsa-miR-3188	0	1.44687	0	0	0	0	0.665438	0.876996	1.98295	2.24787	1.52503	2.846	0.241145	1.69071	-0.610478	1.15366	-0.529165	0.596691	0.717737
hsa-miR-320b	2605.26	3468.87	5631.2	3621.09	3133.87	3827.87	917.639	2377.54	3863.58	5734.32	2884.75	3662.59	3714.69	3240.07	0.196993	0.371959	0.529609	0.596383	0.717737
hsa-miR-6515-5p	0	5.06404	3.87824	0	0	0	0.221813	4.38498	2.37954	9.36613	3.05006	2.62708	1.49038	3.6716	-0.551919	1.06257	-0.519419	0.603468	0.724006
hsa-miR-9903	0	5.78748	0	0	0	7.90883	2.43994	1.46166	0	2.99716	1.67753	1.75139	2.28272	1.72128	0.563698	1.08325	0.520377	0.602801	0.724006
hsa-miR-490-5p	297.091	68.0029	477.023	4.95023	107.744	308.444	188.319	139.442	818.561	2.99716	346.639	213.012	210.543	284.829	-0.428809	0.830743	-0.516176	0.605732	0.72578
hsa-miR-6511a-5p	0	8.68122	0	19.8009	11.1459	0	4.43625	13.4473	15.8636	10.8647	10.9802	10.9462	6.60468	11.0897	-0.322415	0.626449	-0.51467	0.606783	0.726099
hsa-miR-148b-5p	205.678	326.993	155.13	232.661	237.78	47.453	260.63	168.091	191.949	150.233	153.723	165.506	200.949	181.689	0.178597	0.348149	0.51299	0.607959	0.726566
hsa-miR-2467-3p	0	0	0	0	0	0	0	0.292332	3.17272	1.49858	0.762515	2.846	0	1.42869	-0.771623	1.51682	-0.508711	0.610955	0.728429
hsa-miR-574-3p	1211.22	1062.73	1454.34	1801.88	1075.58	1732.03	1038.97	1365.78	1526.08	2057.55	1390.83	1684.4	1389.63	1510.6	-0.119177	0.234364	-0.508514	0.611093	0.728429
hsa-miR-106a-5p	22.8531	5.78748	0	0	1.85766	0	3.10538	3.21565	3.17272	2.62252	0.762515	0.437847	5.08304	2.21944	0.464502	0.925615	0.501831	0.615787	0.732137
hsa-miR-6516-5p	0	2.1703	0	0	1.85766	0	0.665438	2.04632	0	0.74929	1.06752	1.09462	0.671327	0.937198	0.622233	1.23852	0.502402	0.615385	0.732137
hsa-miR-7845-5p	0	2.89374	19.3912	0	0	0	1.10906	4.96964	4.36249	2.62252	2.59255	1.97031	3.71416	2.93776	0.467053	0.933829	0.500149	0.61697	0.732603
hsa-miR-30e-5p	4273.53	8745.61	2152.42	1841.49	3936.37	3210.99	8288.92	5290.62	3073.57	3170.25	4011.28	3890.49	4026.73	4620.86	-0.195816	0.399423	-0.490248	0.623958	0.739951
hsa-miR-4485-3p	114.266	34.7249	58.1736	32.1765	33.4378	55.3618	92.0522	9.35462	32.917	68.1854	28.518	11.1651	54.69	40.3654	0.278615	0.571338	0.487653	0.625796	0.741179
hsa-miR-137-5p	22.8531	2.1703	3.87824	0	0	0	1.55269	5.26198	5.15567	2.24787	3.05006	1.09462	4.81694	3.06048	-0.45392	0.933203	-0.486411	0.626676	0.741273
hsa-miR-10b-5p	17505.5	16354	17785.6	25134.8	19380.9	8415	46162.1	11727.2	5143.77	11912.6	8157.23	4795.73	17429.3	14649.8	0.246357	0.510349	0.482723	0.629292	0.742468
hsa-miR-6727-5p	0	0.723435	0	7.42535	0	0	0.887251	1.46166	5.15567	3.74645	4.11758	2.18923	1.35813	2.92631	-0.484248	1.00205	-0.483256	0.628914	0.742468
hsa-miR-3163	22.8531	2.89374	0	0	3.71531	0	4.21444	3.50798	2.77613	4.49574	2.13504	3.7217	4.91036	3.47517	-0.372256	0.77878	-0.477998	0.632652	0.744533
hsa-miR-4781-3p	0	2.89374	0	0	0	0	1.55269	2.33866	3.9659	0.74929	1.37253	2.846	0.48229	2.13751	-0.547365	1.14323	-0.478788	0.63209	0.744533
hsa-miR-1245b-3p	0	1.44687	0	2.47512	0	0	1.55269	1.75399	0	0	0.610012	1.09462	0.653664	0.835218	0.647453	1.37648	0.470368	0.638092	0.749438
hsa-miR-218-2-3p	0	0	0	0	7.43063	0	0	0.584664	2.37954	0	1.83004	1.97031	1.23844	1.12742	0.70708	1.50882	0.46863	0.639334	0.749438
hsa-miR-3918	0	0	11.6347	0	0	0	1.33088	2.04632	10.7079	1.87323	2.59255	1.97031	1.93912	3.4202	-0.527715	1.12853	-0.467614	0.640061	0.749438
hsa-miR-873-3p	251.384	153.368	860.969	980.146	336.236	221.447	170.13	178.907	676.582	527.5	408.555	433.03	467.258	399.118	0.235546	0.503574	0.467749	0.639964	0.749438
hsa-miR-4682	0	0	0	0	1.85766	7.90883	0.443625	1.46166	0.39659	1.49858	6.71013	2.18923	1.62775	2.11664	-0.529584	1.1553	-0.458394	0.64667	0.756219
hsa-miR-3911	22.8531	0	7.75648	0	0	0	1.55269	4.38498	3.56931	2.24787	3.05006	3.28385	5.1016	3.01479	-0.457713	1.01151	-0.452504	0.650906	0.760212
hsa-miR-3152-3p	0	2.1703	0	0	0	0	1.7745	1.75399	0.79318	1.12394	4.88009	0.65677	0.361717	1.83041	-0.541948	1.21746	-0.445148	0.656213	0.763518
hsa-miR-330-3p	159.972	133.835	127.982	363.842	98.4558	268.9	99.5939	171.891	216.538	200.435	172.176	170.322	192.165	171.826	0.15968	0.358201	0.445784	0.655753	0.763518
hsa-miR-4769-5p	0	0	7.75648	0	0	0	0.887251	2.33866	3.56931	2.24787	3.66007	0.65677	1.29275	2.22665	-0.4933	1.10654	-0.445804	0.655738	0.763518
hsa-miR-675-3p	0	0	0	0	0	7.90883	0	0	0	0	2.44005	0	1.31814	0.406674	0.83695	1.8886	0.443159	0.65765	0.764229
hsa-miR-3939	0	0	0	2.47512	0	0	1.7745	1.16933	0.39659	2.24787	2.28754	1.09462	0.412519	1.49508	-0.510123	1.15422	-0.441964	0.658516	0.764275
hsa-miR-3176	22.8531	34.0014	50.4171	66.8281	27.8648	63.2707	45.9152	44.7268	50.7635	12.3633	37.5157	46.6307	44.2059	39.6525	0.179097	0.413198	0.433441	0.664694	0.769515
hsa-miR-501-5p	45.7062	15.1921	3.87824	12.3756	7.43063	15.8177	5.3235	19.2939	12.2943	15.3604	24.7055	12.4786	16.7334	14.9094	-0.239075	0.550948	-0.433934	0.664336	0.769515
hsa-miR-6787-5p	0	6.51091	0	2.47512	0	0	1.7745	1.46166	7.13862	3.37181	3.50757	4.81631	1.49767	3.67841	-0.410112	0.968956	-0.423251	0.672112	0.77713
hsa-miR-548l	0	0	0	4.95023	0	7.90883	1.55269	1.46166	0	2.62252	1.06752	1.53246	2.14318	1.37281	0.486402	1.15437	0.421357	0.673494	0.777756
hsa-miR-199a-3p	20842	33840.8	18421.6	13979.5	31951.7	25664.2	34011	21946.5	13643.1	18846.9	18515.5	25870	24116.6	22138.8	0.123025	0.293903	0.418591	0.675515	0.778146
hsa-miR-199b-3p	20842	33840.8	18421.6	13979.5	31951.7	25664.2	34011	21946.5	13643.1	18846.9	18515.5	25870	24116.6	22138.8	0.123025	0.293903	0.418591	0.675515	0.778146
hsa-miR-659-5p	45.7062	5.06404	0	14.8507	9.28828	0	7.98526	7.3083	7.53521	7.86755	5.49011	5.25416	12.4849	6.90676	0.245516	0.590417	0.415835	0.67753	0.778529
hsa-miR-766-5p	0	0	19.3912	0	7.43063	0	2.43994	3.80032	8.32839	12.7379	6.40512	6.12985	4.4703	6.64026	-0.382994	0.920071	-0.416266	0.677215	0.778529
hsa-miR-301b-5p	0	0	0	0	0	7.90883	0.887251	0	0.79318	0.374645	1.67753	0	1.31814	0.622101	0.618103	1.51032	0.409254	0.682353	0.783098
hsa-miR-323a-3p	137.119	497.723	221.06	499.973	375.247	403.35	420.557	326.535	281.579	642.142	288.993	454.923	355.745	402.455	-0.134139	0.330417	-0.405969	0.684765	0.78392
hsa-miR-6840-5p	0	5.78748	0	0	0	0	4.87988	2.92332	3.9659	0.74929	4.27008	0.65677	0.96458	2.90754	-0.46958	1.15411	-0.406875	0.6841	0.78392
hsa-miR-6796-5p	0	0	0	0	0	0	0	0.876996	0.39659	3.37181	3.81257	0	0	1.40966	-0.68325	1.69687	-0.402653	0.687203	0.785739
hsa-miR-130b-3p	1645.42	1600.96	1954.63	1732.58	1974.69	941.151	1808.88	1328.36	1583.19	1633.08	1725.72	1226.19	1641.57	1550.9	0.0861523	0.21587	0.399094	0.689824	0.787171
hsa-miR-656-5p	0	8.68122	0	0	0	0	1.10906	1.75399	1.98295	3.37181	1.98254	1.31354	1.44687	1.91898	0.44655	1.12018	0.398642	0.690157	0.787171
hsa-miR-6892-5p	22.8531	4.34061	0	0	0	7.90883	1.33088	4.96964	10.3113	2.99716	2.28754	1.75139	5.85043	3.94132	-0.372978	0.944679	-0.39482	0.692976	0.789412
hsa-miR-197-3p	22.8531	56.4279	174.521	220.285	70.5909	102.815	81.1834	106.409	173.31	123.258	143.353	131.792	107.915	126.551	-0.156252	0.40176	-0.388918	0.697337	0.793403
hsa-miR-4645-3p	0	5.78748	0	7.42535	1.85766	0	5.10169	4.09265	1.98295	1.49858	1.67753	3.50277	2.51175	2.97603	0.321192	0.837202	0.383649	0.701238	0.796862
hsa-miR-221-3p	15585.8	18441.1	18677.6	14687.3	14313.2	21219.4	22928.6	18302.9	16977.6	13797.8	17838.7	18126	17154.1	17995.3	-0.0687977	0.180006	-0.382197	0.702315	0.797106
hsa-miR-6797-5p	0	5.06404	0	2.47512	0	0	1.10906	3.80032	3.17272	2.99716	3.05006	4.37847	1.25653	3.08463	-0.352783	0.949379	-0.371593	0.710196	0.805063
hsa-miR-4763-5p	0	0	0	0	0	7.90883	0	0.292332	0.39659	2.24787	0.610012	0.65677	1.31814	0.700596	0.517246	1.39638	0.370419	0.711071	0.805068
hsa-miR-3161	0	0	0	0	18.5766	0	0	0	0	0	7.77765	5.03524	3.09609	2.13548	0.64035	1.74129	0.367745	0.713064	0.806337
hsa-miR-9-5p	0	7.23435	34.9041	0	0	0	3.99263	20.7556	6.34544	1.12394	1.52503	0.875693	7.02308	5.76972	0.397989	1.09221	0.364388	0.715568	0.808181
hsa-miR-100-5p	88784.4	84312	73799	199705	91079	113199	141864	97564.6	59002.3	147620	76801.8	77890.1	108480	100124	0.114881	0.325127	0.353342	0.723832	0.816518
hsa-miR-331-5p	45.7062	26.7671	23.2694	56.9276	39.0108	31.6353	27.0611	49.4041	42.4351	42.7095	35.8382	38.3116	37.2194	39.2933	-0.114894	0.32784	-0.350457	0.725996	0.817961
hsa-miR-3187-3p	0	2.1703	0	9.90046	1.85766	15.8177	1.99631	3.80032	5.94885	2.99716	5.64261	2.40816	4.95768	3.7989	0.261135	0.751924	0.347289	0.728374	0.818998
hsa-miR-610	0	2.1703	0	0	7.43063	0	1.7745	0.876996	1.58636	0	4.72759	2.18923	1.60016	1.85911	0.399396	1.15142	0.346873	0.728687	0.818998
hsa-miR-487a-3p	91.4125	279.969	46.5389	94.0544	100.313	23.7265	151.942	88.2843	51.5567	112.019	76.099	110.775	106.002	98.4459	0.165197	0.485044	0.340581	0.733419	0.822318
hsa-miR-92b-5p	91.4125	10.8515	7.75648	9.90046	9.28828	23.7265	9.09432	14.9089	25.7783	22.1041	19.9779	16.8571	25.4893	18.1201	-0.192606	0.564569	-0.341156	0.732986	0.822318
hsa-miR-20a-3p	0	1.44687	0	0	0	7.90883	1.7745	2.63099	0.79318	0	0.762515	0.437847	1.55928	1.06651	0.390879	1.19292	0.327666	0.743164	0.832236
hsa-miR-374b-5p	45.7062	54.2576	3.87824	0	68.7333	39.5442	64.7693	49.9888	14.6738	41.5856	38.1257	35.9034	35.3533	40.8411	-0.213105	0.658252	-0.323744	0.746132	0.834549
hsa-miR-6816-3p	0	2.1703	0	0	0	0	0.665438	2.33866	1.18977	0.374645	0.610012	4.81631	0.361717	1.66581	-0.412611	1.28081	-0.322149	0.74734	0.834891
hsa-miR-1306-5p	0	0	15.513	0	0	7.90883	2.43994	4.67731	8.32839	2.24787	5.1851	4.37847	3.90363	4.54285	-0.313524	0.979593	-0.320055	0.748926	0.835654
hsa-miR-618	0	6.51091	3.87824	2.47512	29.7225	15.8177	36.3773	4.96964	7.13862	1.12394	14.6403	13.5732	9.73407	12.9705	-0.257571	0.812807	-0.31689	0.751327	0.837322
hsa-miR-2116-5p	0	2.1703	0	2.47512	0	7.90883	0.887251	2.04632	1.18977	2.62252	2.28754	1.09462	2.09238	1.688	0.282146	0.910608	0.309843	0.75668	0.841821
hsa-miR-3174	0	1.44687	0	12.3756	14.8613	0	9.98157	6.4313	4.75908	10.1154	9.76019	2.846	4.78062	7.31559	-0.237451	0.767999	-0.309181	0.757184	0.841821
hsa-miR-10a-5p	6238.9	12676	3851.09	2249.88	17907.8	14710.4	3329.63	13694	2748.76	2222.77	11327.6	17449.3	9605.69	8462.01	0.178944	0.585952	0.30539	0.760069	0.844014
hsa-miR-1910-3p	0	2.1703	0	9.90046	0	0	1.33088	5.26198	3.56931	3.37181	3.96508	3.28385	2.01179	3.46382	-0.263902	0.881786	-0.299282	0.764725	0.848166
hsa-miR-3157-3p	0	0.723435	0	0	1.85766	7.90883	1.10906	2.33866	0.39659	0	1.22002	2.40816	1.74832	1.24541	0.32835	1.12226	0.29258	0.769843	0.8518
hsa-miR-4709-5p	0	2.89374	0	0	0	0	0	0.292332	0.79318	0.374645	0.762515	3.28385	0.48229	0.917754	0.438664	1.49576	0.293272	0.769315	0.8518
hsa-miR-641	45.7062	73.7904	34.9041	39.6018	57.5873	15.8177	46.3588	43.8498	46.7976	42.3349	94.3993	35.6845	44.5679	51.5708	-0.11443	0.392897	-0.291246	0.770863	0.85191
hsa-miR-6861-5p	22.8531	0	0	0	0	0	0.443625	1.46166	0.79318	1.12394	0.457509	0.437847	3.80885	0.786293	0.354351	1.22734	0.288714	0.7728	0.853031
hsa-miR-6780a-5p	0	3.61717	3.87824	7.42535	1.85766	0	1.99631	3.50798	3.9659	4.1211	2.74505	3.28385	2.7964	3.27003	0.199302	0.716268	0.27825	0.78082	0.860857
hsa-miR-6881-3p	0	1.44687	0	2.47512	0	0	1.33088	1.46166	0.79318	0.374645	2.44005	0	0.653664	1.06673	0.353207	1.27818	0.276335	0.782291	0.861451
hsa-miR-7703	0	5.78748	0	0	0	0	1.7745	3.50798	0.39659	0.74929	1.52503	1.31354	0.96458	1.54449	0.332059	1.21514	0.273267	0.784648	0.863019
hsa-miR-4742-3p	0	2.89374	0	0	18.5766	0	2.88356	4.09265	4.75908	4.1211	3.05006	6.34878	3.57838	4.2092	0.23017	0.864029	0.266392	0.789938	0.867001
hsa-miR-6862-5p	0	0	0	9.90046	7.43063	0	1.10906	4.96964	9.91475	2.99716	5.79511	2.846	2.88851	4.60529	-0.256184	0.962644	-0.266125	0.790143	0.867001
hsa-miR-1229-3p	0	0	0	0	0	7.90883	0.221813	1.46166	0	1.49858	1.67753	3.50277	1.31814	1.39373	-0.346916	1.33125	-0.260593	0.794406	0.869616
hsa-miR-6511b-5p	0	18.0859	11.6347	42.077	14.8613	23.7265	10.4252	30.9872	34.1067	22.4787	19.2154	19.0463	18.3975	22.7099	-0.123757	0.473791	-0.261206	0.793933	0.869616
hsa-miR-483-5p	0	0	11.6347	0	1.85766	0	0	0	6.74203	1.49858	2.59255	1.97031	2.24873	2.13391	0.356146	1.37573	0.258877	0.79573	0.870036
hsa-miR-4687-3p	0	0	0	7.42535	0	0	0.887251	1.16933	2.37954	0.74929	2.28754	1.53246	1.23756	1.5009	0.290993	1.14389	0.254388	0.799195	0.872793
hsa-miR-1270	0	0	0	14.8507	0	0	2.43994	2.63099	5.94885	1.49858	0.457509	2.846	2.47512	2.63698	0.281441	1.15633	0.243393	0.807701	0.880475
hsa-miR-151a-3p	6833.08	8407.76	7993.05	9652.95	9637.52	6508.97	10352.7	8958.51	6205.84	9071.66	7755.99	8338.79	8172.22	8447.24	-0.0450247	0.186284	-0.2417	0.809013	0.880475
hsa-miR-329-3p	22.8531	56.4279	34.9041	47.0272	14.8613	55.3618	50.3515	35.0798	31.3306	41.5856	29.4331	38.7494	38.5726	37.755	0.0876482	0.362772	0.241607	0.809085	0.880475
hsa-miR-6813-5p	0	5.78748	3.87824	0	0	0	0.665438	2.92332	3.56931	3.37181	4.42259	3.7217	1.61095	3.11236	-0.229499	0.964302	-0.237994	0.811885	0.882484
hsa-miR-4761-3p	0	0.723435	0	12.3756	0	7.90883	5.3235	2.04632	2.37954	1.49858	4.72759	2.40816	3.50131	3.06395	0.21539	0.911763	0.236235	0.813251	0.882931
hsa-miR-3138	68.5593	20.9796	15.513	27.2263	7.43063	39.5442	13.0869	25.7252	38.0726	25.4759	28.213	20.1409	29.8755	25.1191	-0.108838	0.469501	-0.231816	0.816681	0.883883
hsa-miR-320a-3p	12203.6	12106.7	14652	16474.4	10785.6	20048.9	5789.31	12840.1	22433.1	16811.1	14349.8	18508	14378.5	15121.9	-0.0721966	0.310395	-0.232596	0.816075	0.883883
hsa-miR-503-5p	45.7062	30.3843	65.93	69.3032	87.3099	15.8177	36.8209	55.8354	57.1089	17.6083	92.4168	42.0333	52.4085	50.3039	0.107364	0.463952	0.231412	0.816995	0.883883
hsa-miR-4479	0	5.06404	0	0	0	0	0.887251	1.46166	3.9659	0.374645	0.762515	1.53246	0.844007	1.49741	0.28385	1.23735	0.229401	0.818557	0.884539
hsa-miR-27b-3p	34234	71121.6	27803.1	25689.2	37444.8	39694.4	44087.9	47971.7	31739.1	30247.7	36980.4	34907.8	39331.2	37655.8	0.0627241	0.276176	0.227117	0.820333	0.885424
hsa-miR-6770-3p	0	0	7.75648	12.3756	13.0036	15.8177	4.21444	10.8163	12.6909	8.24219	7.93015	11.8219	8.15889	9.28597	-0.153339	0.701873	-0.218471	0.827062	0.891647
hsa-miR-4769-3p	0	0	11.6347	0	0	0	1.10906	1.46166	1.58636	2.99716	1.52503	2.40816	1.93912	1.8479	0.237352	1.09677	0.21641	0.828668	0.892338
hsa-miR-34c-3p	0	4.34061	0	0	1.85766	0	1.10906	1.75399	3.9659	3.74645	1.83004	2.62708	1.03304	2.50542	-0.208831	0.99073	-0.210785	0.833055	0.896018
hsa-miR-369-5p	228.531	539.682	120.225	106.43	358.528	790.883	486.435	310.164	185.207	364.53	229.059	435.876	357.38	335.212	0.0946285	0.471375	0.20075	0.840894	0.903265
hsa-miR-629-5p	22.8531	11.575	34.9041	44.5521	26.0072	0	20.185	15.7859	18.2431	37.4645	38.8882	25.1762	23.3152	25.9572	-0.0965681	0.48366	-0.199661	0.841746	0.903265
hsa-miR-4725-3p	0	0.723435	0	12.3756	0	0	3.10538	3.21565	2.77613	0.374645	6.71013	4.15954	2.18317	3.39025	-0.197811	1.03934	-0.190323	0.849056	0.910054
hsa-miR-1271-5p	68.5593	69.4498	127.982	79.2037	81.7369	110.724	113.568	68.698	124.133	109.022	58.1036	41.3765	89.6092	85.8168	0.0660558	0.351931	0.187695	0.851116	0.911206
hsa-miR-1245a	0	5.78748	0	0	3.71531	7.90883	6.43257	2.92332	0.79318	0.74929	5.79511	6.34878	2.90194	3.84037	-0.159497	0.917021	-0.173929	0.861921	0.918522
hsa-miR-24-1-5p	0	7.95778	0	0	0	0	1.55269	1.75399	1.58636	1.87323	2.59255	3.7217	1.3263	2.18009	0.195444	1.10265	0.177249	0.859313	0.918522
hsa-miR-411-3p	45.7062	79.5778	31.0259	12.3756	195.054	23.7265	117.783	66.067	45.6078	80.174	58.1036	68.7419	64.5777	72.7462	-0.0961983	0.552431	-0.174136	0.861758	0.918522
hsa-miR-4753-5p	22.8531	0	0	0	0	15.8177	1.7745	1.75399	0.39659	3.37181	3.66007	1.75139	6.44513	2.11806	0.19848	1.12668	0.176164	0.860165	0.918522
hsa-miR-7851-3p	0	0	0	2.47512	0	0	0.443625	0.292332	0.39659	1.87323	3.05006	1.31354	0.412519	1.22823	-0.219229	1.27221	-0.172322	0.863184	0.91881
hsa-miR-589-3p	68.5593	60.0451	69.8083	84.1539	55.7297	79.0883	48.577	74.837	78.9214	71.9319	89.5192	58.4525	69.5641	70.3732	-0.0461567	0.269889	-0.171021	0.864207	0.918841
hsa-miR-5191	0	0	0	0	7.43063	0	0	3.50798	2.77613	2.24787	0	1.53246	1.23844	1.67741	0.251055	1.50292	0.167045	0.867335	0.921107
hsa-miR-296-3p	137.119	159.156	147.373	472.747	219.203	158.177	104.474	220.711	224.073	261.128	264.898	198.345	215.629	212.271	0.059358	0.366913	0.161777	0.871482	0.922754
hsa-miR-412-3p	0	2.1703	0	0	0	0	0.665438	2.04632	0.79318	4.1211	0.610012	0.437847	0.361717	1.44565	-0.209858	1.28268	-0.163609	0.870039	0.922754
hsa-miR-4741	0	3.61717	11.6347	51.9774	1.85766	0	5.3235	6.72364	18.2431	8.61684	17.0803	16.4192	11.5145	12.0678	0.124449	0.777775	0.160007	0.872876	0.922754
hsa-miR-940	68.5593	36.1717	85.3212	133.656	131.894	23.7265	62.5512	97.9312	101.924	82.7966	98.0594	75.9664	79.8881	86.5381	-0.0623617	0.389264	-0.160204	0.87272	0.922754
hsa-miR-543	91.4125	240.904	147.373	465.322	250.784	292.627	221.591	234.743	274.044	282.108	257.272	230.745	248.07	250.084	0.0465007	0.301435	0.154265	0.877401	0.926479
hsa-miR-320e	0	7.23435	0	9.90046	9.28828	15.8177	3.99263	6.13897	15.467	10.1154	5.0326	8.97586	7.04013	8.28708	-0.0932768	0.614348	-0.151831	0.87932	0.927447
hsa-miR-576-5p	0	24.5968	11.6347	0	33.4378	0	37.7081	10.524	8.72498	9.36613	12.5052	14.0111	11.6116	15.4733	-0.110659	0.740508	-0.149436	0.88121	0.928381
hsa-let-7g-3p	0	2.89374	0	17.3258	0	7.90883	5.54532	5.55431	7.13862	5.61968	5.1851	4.15954	4.68806	5.53376	-0.107522	0.736437	-0.146003	0.883919	0.930177
hsa-miR-10a-3p	0	13.7453	0	7.42535	50.1567	15.8177	2.88356	30.1102	4.75908	2.62252	28.3655	37.6548	14.5242	17.7326	-0.119594	0.851639	-0.140428	0.888322	0.93255
hsa-miR-34b-3p	0	0	3.87824	0	11.1459	7.90883	5.54532	6.13897	3.17272	0.374645	5.1851	1.97031	3.82217	3.73118	0.135107	0.98213	0.137565	0.890584	0.93255
hsa-miR-4638-3p	22.8531	0.723435	0	4.95023	11.1459	0	2.88356	4.38498	6.74203	3.37181	6.40512	5.69201	6.61212	4.91325	-0.105504	0.759915	-0.138837	0.889579	0.93255
hsa-miR-550a-3-5p	68.5593	17.3624	34.9041	74.2535	3.71531	31.6353	18.8541	28.9409	60.2817	32.5941	35.5332	22.1113	38.405	33.0525	0.0760068	0.553368	0.137353	0.890752	0.93255
hsa-miR-6740-5p	0	0	0	0	14.8613	7.90883	0.887251	4.38498	5.94885	2.99716	3.50757	5.69201	3.79501	3.90297	0.1359	0.999836	0.135922	0.891883	0.93255
hsa-miR-8072	0	1.44687	0	9.90046	0	0	1.10906	1.75399	5.15567	1.12394	1.06752	4.37847	1.89122	2.43144	0.138224	1.02017	0.135491	0.892224	0.93255
hsa-miR-550a-5p	68.5593	17.3624	34.9041	74.2535	3.71531	31.6353	18.8541	28.9409	60.6782	32.5941	35.5332	22.1113	38.405	33.1186	0.0733781	0.553902	0.132475	0.894609	0.933988
hsa-miR-1276	22.8531	4.34061	15.513	9.90046	37.1531	0	13.7524	9.06229	19.4329	17.2337	18.4529	6.34878	14.96	14.0471	0.0753867	0.601035	0.125428	0.900185	0.93875
hsa-miR-6753-5p	0	2.1703	0	0	1.85766	0	1.7745	0.584664	2.37954	1.12394	0.915018	1.75139	0.671327	1.42151	0.131962	1.06934	0.123405	0.901787	0.939361
hsa-miR-103a-2-5p	0	7.23435	0	0	0	0	1.33088	0.584664	3.9659	3.74645	1.37253	1.97031	1.20572	2.16179	0.119663	1.15713	0.103414	0.917635	0.94633
hsa-miR-125b-2-3p	228.531	290.097	473.145	841.539	165.331	411.259	142.626	440.837	511.204	609.922	326.204	481.85	401.651	418.774	-0.0453899	0.427895	-0.106077	0.915521	0.94633
hsa-miR-200b-3p	0	3.61717	23.2694	29.7014	0	7.90883	9.31613	7.01597	17.0534	14.6112	10.5227	14.8868	10.7495	12.2344	-0.0732545	0.686931	-0.10664	0.915074	0.94633
hsa-miR-3175	0	1.44687	0	14.8507	7.43063	0	2.21813	8.1853	3.56931	3.74645	8.23516	6.34878	3.9547	5.38385	-0.0830357	0.79286	-0.104729	0.916591	0.94633
hsa-miR-3648	0	0	0	0	0	15.8177	1.55269	0.876996	2.37954	1.12394	0.915018	1.53246	2.63628	1.39677	0.117072	1.13276	0.103352	0.917684	0.94633
hsa-miR-373-3p	45.7062	21.703	0	0	0	0	0	38.0032	5.94885	1.49858	1.37253	0	11.2349	7.80385	0.182892	1.65493	0.110514	0.912002	0.94633
hsa-miR-548p	0	2.1703	0	0	7.43063	0	4.87988	1.46166	3.17272	1.12394	1.67753	2.18923	1.60016	2.41749	0.101173	0.958499	0.105554	0.915936	0.94633
hsa-miR-6761-5p	0	4.34061	0	0	0	0	1.55269	1.16933	2.77613	2.99716	1.52503	1.53246	0.723435	1.92547	-0.12427	1.12655	-0.110311	0.912163	0.94633
hsa-miR-7854-3p	0	0	0	2.47512	0	0	0.665438	4.09265	0.39659	1.12394	0.610012	0.218923	0.412519	1.18459	-0.14238	1.30719	-0.108921	0.913265	0.94633
hsa-miR-1299	0	6.51091	0	2.47512	7.43063	7.90883	1.7745	14.9089	0	1.87323	6.40512	1.75139	4.05425	4.45219	0.100749	1.00152	0.100596	0.919871	0.946726
hsa-miR-6885-5p	0	2.89374	0	0	0	0	1.33088	2.63099	1.98295	1.49858	0.915018	0.875693	0.48229	1.53902	-0.117697	1.17358	-0.100289	0.920115	0.946726
hsa-miR-23c	0	5.06404	0	0	0	0	1.55269	3.50798	1.18977	1.49858	1.37253	1.31354	0.844007	1.73918	0.107243	1.14946	0.0932988	0.925666	0.951379
hsa-miR-3944-3p	0	0	3.87824	0	7.43063	0	2.21813	1.46166	5.55226	1.87323	4.72759	0.65677	1.88481	2.74827	-0.0778012	1.04459	-0.0744798	0.940629	0.965684
hsa-miR-615-3p	1142.66	656.156	2117.52	1670.7	1120.17	996.513	1075.13	893.074	1775.14	1178.26	1516.64	1161.39	1283.95	1266.6	0.0214133	0.305728	0.0700402	0.944162	0.968237
hsa-miR-1913	0	5.06404	0	0	0	0	0.887251	1.16933	1.58636	0.374645	4.11758	2.18923	0.844007	1.72073	0.0810852	1.22103	0.0664071	0.947054	0.970127
hsa-miR-483-3p	0	0	3.87824	0	9.28828	0	0	0	13.4841	0	3.96508	2.18923	2.19442	3.27306	-0.0965497	1.52108	-0.0634745	0.949389	0.97037
hsa-miR-770-5p	0	23.1499	42.6606	17.3258	37.1531	79.0883	21.7376	29.2332	31.7272	34.0927	26.383	63.7067	33.2296	34.4801	-0.0282933	0.436927	-0.0647553	0.948369	0.97037
hsa-miR-6842-3p	0	15.9156	15.513	12.3756	7.43063	23.7265	3.32719	13.7396	28.9511	6.36897	14.3353	11.8219	12.4935	13.0907	0.0366371	0.599571	0.0611056	0.951275	0.971225
hsa-miR-6894-5p	0	15.9156	3.87824	14.8507	29.7225	7.90883	10.4252	16.9553	13.4841	19.1069	20.8929	12.4786	12.046	15.5572	-0.0287863	0.494036	-0.0582676	0.953536	0.972459
hsa-miR-1185-5p	0	44.1295	19.3912	2.47512	5.57297	15.8177	39.7045	15.7859	7.9318	8.61684	11.8952	20.1409	14.5644	17.3459	-0.0323773	0.684432	-0.0473053	0.96227	0.975198
hsa-miR-3620-3p	0	2.1703	0	0	0	0	0.665438	1.46166	1.58636	0.374645	1.52503	1.31354	0.361717	1.15445	0.0603555	1.24699	0.048401	0.961397	0.975198
hsa-miR-4649-3p	0	1.44687	0	2.47512	0	0	0.221813	2.33866	5.94885	0	0.305006	0.437847	0.653664	1.54203	-0.0690508	1.35258	-0.0510513	0.959285	0.975198
hsa-miR-5699-3p	0	6.51091	0	2.47512	0	0	2.66175	2.63099	1.18977	1.12394	4.88009	2.846	1.49767	2.55542	0.047103	1.0031	0.0469574	0.962547	0.975198
hsa-miR-6732-5p	0	0	0	2.47512	0	0	0	1.75399	1.58636	1.49858	1.06752	0.218923	0.412519	1.0209	0.0664364	1.3953	0.0476143	0.962024	0.975198
hsa-miR-6862-3p	0	0	0	0	3.71531	0	0.443625	1.16933	0.79318	2.62252	1.37253	1.31354	0.619219	1.28579	0.0618881	1.17702	0.0525801	0.958066	0.975198
hsa-miR-4668-5p	0	2.89374	0	0	0	0	2.21813	1.75399	0.79318	0.374645	1.22002	1.53246	0.48229	1.31541	0.0523103	1.23205	0.0424578	0.966134	0.977761
hsa-miR-1255a	0	5.06404	3.87824	0	48.2991	31.6353	14.4178	10.8163	15.467	17.6083	27.7555	10.5083	14.8128	16.0955	-0.0243089	0.723435	-0.0336021	0.973194	0.98038
hsa-miR-1268a	22.8531	2.89374	0	22.276	29.7225	15.8177	3.77081	14.6166	16.2602	24.3519	23.0279	5.03524	15.5938	14.5105	0.023197	0.712317	0.0325656	0.974021	0.98038
hsa-miR-1268b	22.8531	2.89374	0	22.276	29.7225	15.8177	3.77081	14.6166	16.2602	24.3519	23.0279	5.03524	15.5938	14.5105	0.023197	0.712317	0.0325656	0.974021	0.98038
hsa-miR-214-3p	1211.22	1063.45	1838.28	3014.69	1057.01	1565.95	861.964	1634.43	2026.18	1855.99	1869.69	1606.46	1625.1	1642.45	-0.0112159	0.320409	-0.0350049	0.972076	0.98038
hsa-miR-3152-5p	0	9.40465	0	0	26.0072	0	23.2903	6.72364	1.98295	0.74929	7.01513	3.50277	5.90197	7.21069	0.038528	1.02299	0.0376623	0.969957	0.98038
hsa-miR-138-5p	45.7062	23.1499	15.513	2.47512	167.189	142.359	1.10906	16.0783	1.58636	1.87323	242.937	124.13	66.0654	64.6189	0.0288222	1.03196	0.0279296	0.977718	0.983032
hsa-miR-411-5p	4319.24	8005.53	1698.67	1608.82	3895.51	4515.94	8632.06	4129.48	1382.91	3256.41	2829.23	3991.85	4007.29	4036.99	-0.0104712	0.46273	-0.0226291	0.981946	0.984478
hsa-miR-4649-5p	0	4.34061	0	12.3756	0	7.90883	0.221813	5.55431	8.32839	6.74361	4.57509	2.18923	4.10417	4.60207	0.0224504	0.939679	0.0238916	0.980939	0.984478
hsa-miR-548ah-3p	0	2.1703	0	0	7.43063	0	6.21075	1.46166	3.17272	1.12394	1.67753	2.18923	1.60016	2.63931	-0.0215867	0.975744	-0.0221234	0.98235	0.984478
hsa-miR-4688	0	0	0	0	9.28828	15.8177	3.10538	6.4313	7.53521	1.87323	2.89756	1.97031	4.18432	3.96883	0.00566518	0.967693	0.00585431	0.995329	0.995575
hsa-miR-4728-3p	0	5.06404	0	0	1.85766	0	0.443625	1.46166	5.15567	1.87323	3.05006	1.53246	1.15362	2.25278	0.00594275	1.07157	0.00554582	0.995575	0.995575
hsa-miR-1-3p	0	0	0	0	0	0	0	0	0	0	0	0	0	0	NA	NA	NA	NA	NA
hsa-miR-1-5p	0	0	0	0	0	0	0	0	0	0	0	0	0	0	NA	NA	NA	NA	NA
hsa-miR-101-2-5p	0	0	0	0	0	0	0	0.292332	0	0.374645	0	0	0	0.111163	1.57938	1.89801	0.832123	0.405339	NA
hsa-miR-101-5p	0	4.34061	0	0	0	0	0	0	0	0.374645	0.305006	0.875693	0.723435	0.259224	1.86622	1.74913	1.06695	0.285996	NA
hsa-miR-10226	0	0	0	0	0	0	0	0	0	0	0	0	0	0	NA	NA	NA	NA	NA
hsa-miR-10392-3p	0	0	0	0	0	0	0	0	0	0	0	0	0	0	NA	NA	NA	NA	NA
hsa-miR-10393-3p	0	0	0	0	0	0	0	0	0	0	0	0	0	0	NA	NA	NA	NA	NA
hsa-miR-10393-5p	0	0	0	0	0	0	0	0	0	0	0	0	0	0	NA	NA	NA	NA	NA
hsa-miR-10395-3p	0	2.1703	0	0	0	0	0.221813	0.584664	2.37954	0.374645	0.762515	1.75139	0.361717	1.01243	0.22448	1.33808	0.167763	0.86677	NA
hsa-miR-10395-5p	0	0	0	0	0	0	0	0	0	0	0	0	0	0	NA	NA	NA	NA	NA
hsa-miR-10397-3p	0	0	0	0	0	0	0	0	0	0	0	0	0	0	NA	NA	NA	NA	NA
hsa-miR-10397-5p	0	0	0	0	0	0	0	0	0	0	0	0	0	0	NA	NA	NA	NA	NA
hsa-miR-10398-3p	0	0	0	0	0	0	0	0	0	0	0	0	0	0	NA	NA	NA	NA	NA
hsa-miR-10398-5p	0	0	0	0	0	0	0	0	0	0	0	0	0	0	NA	NA	NA	NA	NA
hsa-miR-10399-5p	0	1.44687	0	0	0	0	0.443625	0	0	0.374645	0	0	0.241145	0.136378	1.75133	1.89512	0.924126	0.355421	NA
hsa-miR-103a-1-5p	0	0	0	0	0	0	0.443625	0.292332	0.79318	1.87323	0.457509	0.875693	0	0.789261	-0.0907394	1.44414	-0.0628328	0.9499	NA
hsa-miR-103b	0	0	0	0	0	0	0	0	0	0	0	0	0	0	NA	NA	NA	NA	NA
hsa-miR-10400-3p	0	0	0	0	0	0	0	0	0	0	0	0	0	0	NA	NA	NA	NA	NA
hsa-miR-10401-5p	0	0	0	0	0	0	0	0	0	0	0	0	0	0	NA	NA	NA	NA	NA
hsa-miR-105-3p	0	0	0	0	0	0	0	0	0	0	0	0	0	0	NA	NA	NA	NA	NA
hsa-miR-105-5p	0	0	0	0	0	0	0	0	1.18977	0	1.06752	3.7217	0	0.996498	-0.268016	1.85935	-0.144145	0.885386	NA
hsa-miR-10522-5p	0	0	0	0	0	0	0	0	0	0	0	0	0	0	NA	NA	NA	NA	NA
hsa-miR-10523-5p	0	0	0	0	0	0	0	0.876996	0.39659	0.374645	0.152503	0.437847	0	0.373097	0.686765	1.76594	0.388895	0.697354	NA
hsa-miR-10524-5p	0	0	0	0	0	0	0	0	0	0	0	0	0	0	NA	NA	NA	NA	NA
hsa-miR-10525-3p	0	2.89374	0	0	0	0	0	0	0	0	0	0	0.48229	0	2.9868	1.90025	1.57179	0.115999	NA
hsa-miR-106a-3p	0	0	0	0	0	0	0	0	0	0	0	0	0	0	NA	NA	NA	NA	NA
hsa-miR-11181-3p	0	0	0	0	0	0	0	0	0	0	0	0	0	0	NA	NA	NA	NA	NA
hsa-miR-11181-5p	0	0	0	0	0	0	0	0	0	0	0	0	0	0	NA	NA	NA	NA	NA
hsa-miR-11399	0	2.1703	0	0	0	0	0.443625	0	0	0.374645	0.610012	0.875693	0.361717	0.383996	1.21028	1.66255	0.727968	0.466633	NA
hsa-miR-11400	0	0	0	0	0	0	0	0	0	0	0	0	0	0	NA	NA	NA	NA	NA
hsa-miR-11401	0	2.1703	0	0	0	0	0.443625	0	0	0.374645	0	0	0.361717	0.136378	1.86665	1.89457	0.985262	0.324496	NA
hsa-miR-1178-3p	0	0	0	0	0	0	0	0	0	0	0	0	0	0	NA	NA	NA	NA	NA
hsa-miR-1178-5p	0	0	0	0	0	0	0	0	0	0	0	0	0	0	NA	NA	NA	NA	NA
hsa-miR-1179	0	0	0	0	0	0	0	0	0	1.49858	0.305006	0.437847	0	0.373572	0.598321	1.89002	0.316569	0.75157	NA
hsa-miR-1180-5p	0	2.1703	0	0	0	0	0.443625	0	0.79318	0	1.22002	0.65677	0.361717	0.518933	0.902232	1.63514	0.551778	0.581101	NA
hsa-miR-1181	0	0	0	0	0	0	0	0	0	0	0	0	0	0	NA	NA	NA	NA	NA
hsa-miR-1182	0	0	0	0	0	0	0	0	0	0	0	0	0	0	NA	NA	NA	NA	NA
hsa-miR-1183	0	0	0	0	0	0	0	0	0	0	0	0	0	0	NA	NA	NA	NA	NA
hsa-miR-1184	0	0	0	0	0	0	0	0	0	0	0	0	0	0	NA	NA	NA	NA	NA
hsa-miR-1199-3p	0	0	0	0	0	0	0	0	0	0	0	0	0	0	NA	NA	NA	NA	NA
hsa-miR-1199-5p	0	0	0	0	0	0	0	0	0	0	0	0	0	0	NA	NA	NA	NA	NA
hsa-miR-1200	0	0	0	0	0	0	0	0	0	0	0	0	0	0	NA	NA	NA	NA	NA
hsa-miR-1202	0	0	0	0	0	0	0	0	0	0	0	0	0	0	NA	NA	NA	NA	NA
hsa-miR-1203	0	0	0	0	0	0	0	0	0	0	0	0	0	0	NA	NA	NA	NA	NA
hsa-miR-1204	0	0	0	0	0	0	0	0	0	0	0	0	0	0	NA	NA	NA	NA	NA
hsa-miR-1205	0	0	0	0	0	0	0	0	0	0	0	0	0	0	NA	NA	NA	NA	NA
hsa-miR-1206	0	0	0	0	0	0	0	0	0	0	0	0	0	0	NA	NA	NA	NA	NA
hsa-miR-1207-3p	0	0	0	0	0	0	0	0	0	0	0	0	0	0	NA	NA	NA	NA	NA
hsa-miR-1207-5p	0	0	0	0	0	0	0	0	0	0	0	0	0	0	NA	NA	NA	NA	NA
hsa-miR-1208	0	0	0	0	0	0	0	0	0	0	0	0	0	0	NA	NA	NA	NA	NA
hsa-miR-12113	0	0	0	0	0	0	0	0	0	0	0	0	0	0	NA	NA	NA	NA	NA
hsa-miR-12114	0	0	0	0	0	0	0	0.292332	0	0	0.457509	1.09462	0	0.30741	0.744689	1.89094	0.39382	0.693714	NA
hsa-miR-12115	0	0	0	0	0	0	0	0	0	0	0	0	0	0	NA	NA	NA	NA	NA
hsa-miR-12116	0	0	0	0	0	0	0	0	0	0	0	0	0	0	NA	NA	NA	NA	NA
hsa-miR-12117	0	0	0	0	0	0	0	0	0	0	0	0	0	0	NA	NA	NA	NA	NA
hsa-miR-12118	0	0	0	0	0	0	0	0	0	0	0	0	0	0	NA	NA	NA	NA	NA
hsa-miR-12119	0	0	0	0	0	0	0	0	0	0	0	0	0	0	NA	NA	NA	NA	NA
hsa-miR-12120	0	0	0	0	0	0	0	0	0	0	0	0	0	0	NA	NA	NA	NA	NA
hsa-miR-12121	0	0	0	0	0	0	0	0.292332	0	0	0	0	0	0.048722	2.00138	1.90091	1.05286	0.292406	NA
hsa-miR-12122	0	0	0	0	0	0	0	0	0	0	0	0	0	0	NA	NA	NA	NA	NA
hsa-miR-12123	0	0	0	0	0	0	0	0	0	0	0	0	0	0	NA	NA	NA	NA	NA
hsa-miR-12124	0	0	0	0	0	0	0	0	0	0	0	0	0	0	NA	NA	NA	NA	NA
hsa-miR-12125	0	0	0	0	0	0	0	0	0	0	0	0	0	0	NA	NA	NA	NA	NA
hsa-miR-12126	0	0	0	0	0	0	0	0	0	0	0	0	0	0	NA	NA	NA	NA	NA
hsa-miR-12127	0	0	0	0	0	0	0	0	0	0	0	0	0	0	NA	NA	NA	NA	NA
hsa-miR-12128	0	0	0	0	0	0	0	0	0	0	0	0	0	0	NA	NA	NA	NA	NA
hsa-miR-12129	0	0	0	0	0	0	0	0	0	0	0	0	0	0	NA	NA	NA	NA	NA
hsa-miR-12130	0	0	0	0	0	0	0	0	0	0	0	0	0	0	NA	NA	NA	NA	NA
hsa-miR-12131	0	0	0	0	0	0	0	0	0	0	0	0	0	0	NA	NA	NA	NA	NA
hsa-miR-12132	0	0	0	0	0	0	0	0	0	0	0	0	0	0	NA	NA	NA	NA	NA
hsa-miR-12133	0	0	0	0	0	0	0	0	0	0	0	0	0	0	NA	NA	NA	NA	NA
hsa-miR-122-3p	0	0	0	0	0	0	0	0	0	0	0	0	0	0	NA	NA	NA	NA	NA
hsa-miR-122-5p	0	0	0	0	0	0	0	0	0	0	0	0	0	0	NA	NA	NA	NA	NA
hsa-miR-1224-3p	0	0	0	0	0	0	0	0	0	0	0	0	0	0	NA	NA	NA	NA	NA
hsa-miR-1224-5p	0	0	0	0	0	0	0	0	0	0	0	0	0	0	NA	NA	NA	NA	NA
hsa-miR-1225-3p	0	0	0	0	0	7.90883	0	0	0	0	0	0	1.31814	0	2.64794	1.90096	1.39295	0.163634	NA
hsa-miR-1225-5p	0	0	0	0	0	0	0	0	0	0	0	0	0	0	NA	NA	NA	NA	NA
hsa-miR-1227-3p	0	0	0	0	0	0	0	0.292332	0.39659	0	0.457509	0	0	0.191072	1.14314	1.89407	0.603538	0.546151	NA
hsa-miR-1227-5p	0	0	0	0	0	0	0	0	0	0	0	0	0	0	NA	NA	NA	NA	NA
hsa-miR-1229-5p	0	3.61717	0	0	0	0	0	0	0	0	0.152503	0.437847	0.602862	0.0983916	2.27161	1.89567	1.19832	0.230794	NA
hsa-miR-122b-3p	0	0	0	0	0	0	0	0	0	0	0	0	0	0	NA	NA	NA	NA	NA
hsa-miR-122b-5p	0	0	0	0	0	0	0.221813	0.584664	0	0	0.762515	0	0	0.261499	0.877285	1.89187	0.463713	0.642853	NA
hsa-miR-1231	0	0	0	0	0	0	0	0	0	0	0	0	0	0	NA	NA	NA	NA	NA
hsa-miR-1233-5p	0	0	0	0	0	0	0	0	0	0	0	0	0	0	NA	NA	NA	NA	NA
hsa-miR-1236-3p	0	0	0	0	0	0	0	0	0	0	0	0	0	0	NA	NA	NA	NA	NA
hsa-miR-1236-5p	0	0	0	0	0	0	0	0	0	0	0	0.437847	0	0.0729744	1.73937	1.8992	0.91584	0.359751	NA
hsa-miR-1237-3p	0	0	0	0	0	0	0.443625	0.584664	0	0.374645	0.457509	0.218923	0	0.346561	0.749779	1.7578	0.426544	0.669712	NA
hsa-miR-1237-5p	0	0	0	0	0	0	0	0	0	0	0	0	0	0	NA	NA	NA	NA	NA
hsa-miR-1238-3p	0	0	0	0	0	0	0	0	0	0	0	0	0	0	NA	NA	NA	NA	NA
hsa-miR-1238-5p	0	0	0	0	0	0	0	0	0	0	0	0	0	0	NA	NA	NA	NA	NA
hsa-miR-124-3p	0	0	0	0	7.43063	0	0	0	0	0	0	0	1.23844	0	3.42442	1.89902	1.80325	0.0713483	NA
hsa-miR-124-5p	0	0	0	0	0	0	0	0	0	0	0	0	0	0	NA	NA	NA	NA	NA
hsa-miR-1244	0	0.723435	0	0	0	0	0.665438	0	0	0.74929	0	0	0.120572	0.235788	1.16302	1.89198	0.614711	0.538746	NA
hsa-miR-1245b-5p	0	2.1703	0	0	0	0	1.99631	1.16933	0	0	0.305006	1.09462	0.361717	0.760877	0.487911	1.60286	0.304401	0.760823	NA
hsa-miR-1247-5p	0	0	0	0	0	0	0	0	0	0.374645	0.305006	0.218923	0	0.149762	1.33248	1.89594	0.702806	0.482177	NA
hsa-miR-1250-3p	0	0	0	0	0	0	0	0	0	0	0	0	0	0	NA	NA	NA	NA	NA
hsa-miR-1250-5p	0	0	0	0	0	0	0	0	0	0	0	0	0	0	NA	NA	NA	NA	NA
hsa-miR-1251-3p	0	0	0	0	0	0	0	0	0	0	0	0	0	0	NA	NA	NA	NA	NA
hsa-miR-1251-5p	0	0	0	0	0	0	0	0	0	0	0	0	0	0	NA	NA	NA	NA	NA
hsa-miR-1252-3p	0	0	0	0	0	0	0	0	0	0	0	0	0	0	NA	NA	NA	NA	NA
hsa-miR-1253	0	0	0	0	0	0	0	0	0	0	0	0	0	0	NA	NA	NA	NA	NA
hsa-miR-1255b-2-3p	0	0	0	0	0	0	0	0	0	0	0	0	0	0	NA	NA	NA	NA	NA
hsa-miR-1255b-5p	0	0	0	0	0	0	0.221813	0.876996	0.39659	0.374645	0.152503	0.65677	0	0.446553	0.552951	1.59515	0.346646	0.728858	NA
hsa-miR-1256	0	3.61717	0	0	0	0	0.221813	0.292332	0.39659	0	0	0.218923	0.602862	0.188276	2.24707	1.67327	1.34292	0.179297	NA
hsa-miR-1257	0	0	0	0	0	0	0	0	0	0	0	0	0	0	NA	NA	NA	NA	NA
hsa-miR-1258	0	0	0	0	0	0	0	0	0	0	0	0	0	0	NA	NA	NA	NA	NA
hsa-miR-1261	0	0	0	0	0	0	0	0	0.79318	0.374645	0.610012	0	0	0.296306	0.791888	1.89126	0.41871	0.675428	NA
hsa-miR-1263	0	0	0	0	0	0	0	0	0	0	0	0	0	0	NA	NA	NA	NA	NA
hsa-miR-1264	0	0	0	0	0	0	0	0	0	0	0	0	0	0	NA	NA	NA	NA	NA
hsa-miR-1265	0	0	3.87824	0	0	0	0	0.292332	0	0.74929	0.610012	0	0.646373	0.275272	1.38789	1.73695	0.799037	0.424269	NA
hsa-miR-1266-3p	0	0	0	0	0	0	0	0	0	0	0	0	0	0	NA	NA	NA	NA	NA
hsa-miR-1266-5p	0	0	0	0	0	0	0	0	0	0	0.305006	0	0	0.0508343	1.87324	1.90004	0.985897	0.324184	NA
hsa-miR-1269a	0	0	0	0	0	0	0.665438	0	0.79318	0	0.305006	2.846	0	0.768271	-0.0415242	1.77062	-0.0234518	0.98129	NA
hsa-miR-1269b	0	0	0	0	0	0	0	0	0.39659	0	0	0	0	0.0660983	2.00138	1.90091	1.05286	0.292406	NA
hsa-miR-1271-3p	0	0	0	0	0	0	0	0	0	0	0	0	0	0	NA	NA	NA	NA	NA
hsa-miR-1272	0	0	0	0	0	0	0.221813	0.292332	0	0	0.152503	0	0	0.111108	1.52235	1.8976	0.80225	0.422408	NA
hsa-miR-1273h-3p	0	0	0	0	0	0	0	0	0	0	0	0	0	0	NA	NA	NA	NA	NA
hsa-miR-1279	0	0	0	0	0	0	0	0	0	0	0	0	0	0	NA	NA	NA	NA	NA
hsa-miR-128-2-5p	0	0	0	0	0	0	0	0	0	0	0	0	0	0	NA	NA	NA	NA	NA
hsa-miR-1281	0	0	0	0	0	0	0	0	0	0	0	0	0	0	NA	NA	NA	NA	NA
hsa-miR-1282	0	0	0	0	0	0	0	0	0	0	0	0	0	0	NA	NA	NA	NA	NA
hsa-miR-1283	0	0	0	0	0	0	0	0	0	0	0	0	0	0	NA	NA	NA	NA	NA
hsa-miR-1286	0	0	0	0	0	0	0.443625	2.33866	1.18977	0	0.762515	0	0	0.789094	-0.0626027	1.75807	-0.0356088	0.971594	NA
hsa-miR-1288-3p	0	0	0	0	0	0	0	0	0	0	0	0	0	0	NA	NA	NA	NA	NA
hsa-miR-1288-5p	0	0	0	0	0	0	0	0	0	0	0	0	0	0	NA	NA	NA	NA	NA
hsa-miR-1289	0	0	0	0	0	0	0	0	0	0	0	0	0	0	NA	NA	NA	NA	NA
hsa-miR-129-1-3p	0	0	0	0	0	0	0	0	0	0	0	0	0	0	NA	NA	NA	NA	NA
hsa-miR-129-2-3p	0	0	0	0	0	0	0	0	0	0	0	0.437847	0	0.0729744	1.73937	1.8992	0.91584	0.359751	NA
hsa-miR-1292-3p	0	0	0	0	0	0	0	0.292332	0.39659	0	0	0	0	0.11482	1.57938	1.89801	0.832123	0.405339	NA
hsa-miR-1295a	0	0	0	4.95023	0	0	0	0.292332	0.39659	0.74929	0.152503	0.218923	0.825038	0.301606	1.9665	1.4824	1.32657	0.184651	NA
hsa-miR-1295b-3p	0	0	0	0	0	0	0	0	0	0	0	0	0	0	NA	NA	NA	NA	NA
hsa-miR-1295b-5p	0	0	0	0	0	0	0	0	0	0	0	0	0	0	NA	NA	NA	NA	NA
hsa-miR-1297	0	0	0	0	0	0	0	0	0	0	0	0	0	0	NA	NA	NA	NA	NA
hsa-miR-1298-3p	0	0	0	0	0	0	0	0.292332	0	0	0	0	0	0.048722	2.00138	1.90091	1.05286	0.292406	NA
hsa-miR-1301-5p	0	0	0	0	0	0	0.443625	0	0	0	0.152503	0	0	0.0993547	1.57698	1.89799	0.830868	0.406048	NA
hsa-miR-1302	0	0	0	0	0	0	0.887251	0	0.79318	0	0	0.437847	0	0.353046	0.641629	1.89028	0.339437	0.734281	NA
hsa-miR-1304-5p	0	0	0	0	0	0	1.33088	0.876996	0.79318	1.49858	0.762515	1.75139	0	1.16892	-0.61919	1.29006	-0.479969	0.631249	NA
hsa-miR-1321	0	0	0	0	0	0	0	0	0	0	0	0	0	0	NA	NA	NA	NA	NA
hsa-miR-1322	0	0	0	0	0	0	0	1.46166	2.37954	1.12394	1.22002	0.218923	0	1.06735	-0.421276	1.5567	-0.270622	0.786682	NA
hsa-miR-1324	0	0	0	0	0	0	0	0	0	0	0	0	0	0	NA	NA	NA	NA	NA
hsa-miR-133a-5p	0	0	0	0	3.71531	0	0.221813	1.75399	0	0.374645	0.457509	0.437847	0.619219	0.540968	1.11467	1.45723	0.764925	0.444316	NA
hsa-miR-133b	0	0	3.87824	0	0	0	0	0.292332	0	0.374645	0	0.65677	0.646373	0.220625	1.59118	1.75149	0.90847	0.36363	NA
hsa-miR-1343-5p	0	0	0	0	0	0	0.221813	0	0	0	0	0	0	0.0369688	2.00138	1.90091	1.05286	0.292406	NA
hsa-miR-135a-2-3p	0	0	0	0	0	0	0	0	0	0	0	0	0	0	NA	NA	NA	NA	NA
hsa-miR-135a-3p	0	0	0	0	0	0	0	0	0	0	0.305006	0	0	0.0508343	1.87324	1.90004	0.985897	0.324184	NA
hsa-miR-135a-5p	0	0	0	0	0	0	0	0	0	0	0	0	0	0	NA	NA	NA	NA	NA
hsa-miR-138-2-3p	0	0	0	0	0	0	0	0	0	0	0	0	0	0	NA	NA	NA	NA	NA
hsa-miR-139-3p	0	0	0	0	0	0	0	0	0	0	0.305006	0	0	0.0508343	1.87324	1.90004	0.985897	0.324184	NA
hsa-miR-139-5p	0	0	0	0	1.85766	0	0.665438	0.292332	0.39659	0.74929	0.610012	0.875693	0.309609	0.598226	0.661266	1.30999	0.504789	0.613707	NA
hsa-miR-141-5p	0	0	0	0	0	0	0	0.292332	0	0	0	0	0	0.048722	2.00138	1.90091	1.05286	0.292406	NA
hsa-miR-1468-3p	0	0	0	0	0	0	0	0	0	0	0	0	0	0	NA	NA	NA	NA	NA
hsa-miR-1469	0	0	0	0	0	0	0	0	0	0	0	0	0	0	NA	NA	NA	NA	NA
hsa-miR-1470	0	0	0	0	0	0	0	0	0	0	0	0	0	0	NA	NA	NA	NA	NA
hsa-miR-1471	0	0	0	0	0	0	0	0	0	0	0	0	0	0	NA	NA	NA	NA	NA
hsa-miR-147a	0	0	0	0	0	0	0	0	0	0	0	0	0	0	NA	NA	NA	NA	NA
hsa-miR-147b-5p	0	0	0	7.42535	0	0	0	0	0	0	0.152503	0	1.23756	0.0254172	3.07373	1.8978	1.61963	0.105313	NA
hsa-miR-150-3p	0	0	0	0	0	0	0	0	0	0	0	0	0	0	NA	NA	NA	NA	NA
hsa-miR-153-5p	0	0	0	0	0	0	0	0	0	0	0	0	0	0	NA	NA	NA	NA	NA
hsa-miR-1537-3p	0	0	0	0	0	0	0	0	0	0	0	0	0	0	NA	NA	NA	NA	NA
hsa-miR-1537-5p	0	0	0	0	0	0	0	0	0	0	0	0	0	0	NA	NA	NA	NA	NA
hsa-miR-1539	0	0	0	0	0	0	0	0	0	0	0	0	0	0	NA	NA	NA	NA	NA
hsa-miR-155-3p	0	0	0	0	0	0	0	0	0	0	0	0	0	0	NA	NA	NA	NA	NA
hsa-miR-1587	0	0	0	0	0	0	0	0	2.37954	0	0.152503	0.218923	0	0.458494	0.431535	1.88909	0.228435	0.819308	NA
hsa-miR-16-1-3p	0	0	0	0	0	0	0.887251	0	0.79318	2.24787	0.610012	0.65677	0	0.865847	-0.183845	1.56629	-0.117376	0.906562	NA
hsa-miR-181d-3p	0	0	0	0	0	0	0.221813	0	0.39659	0.74929	0.457509	0.437847	0	0.377175	0.680885	1.74834	0.389447	0.696945	NA
hsa-miR-182-3p	0	0	0	0	0	0	0	0	0	0	0	0.218923	0	0.0364872	2.00398	1.90092	1.05422	0.291783	NA
hsa-miR-1825	0	0	0	0	0	0	0	0	0	0	0	0	0	0	NA	NA	NA	NA	NA
hsa-miR-1827	0	0	0	0	0	0	0	0	0	0	0	0	0	0	NA	NA	NA	NA	NA
hsa-miR-183-3p	0	0	0	0	0	0	0	0	0.79318	0	0.305006	0	0	0.183031	1.19149	1.89452	0.628914	0.529405	NA
hsa-miR-187-3p	0	1.44687	0	0	0	0	0.443625	0.584664	1.18977	0.74929	0.305006	0	0.241145	0.545392	0.780473	1.50739	0.517763	0.604624	NA
hsa-miR-187-5p	0	0	0	0	0	0	0	0	0	0	0	0	0	0	NA	NA	NA	NA	NA
hsa-miR-18b-3p	0	0	0	0	0	0	0	0	0	0	0	0	0	0	NA	NA	NA	NA	NA
hsa-miR-18b-5p	0	0	0	0	0	0	0	0.292332	0	0	0	0	0	0.048722	2.00138	1.90091	1.05286	0.292406	NA
hsa-miR-190b-3p	0	0	0	0	0	0	0	0	0	0	0	0	0	0	NA	NA	NA	NA	NA
hsa-miR-190b-5p	0	0	0	0	0	0	0.221813	0.292332	0	1.12394	0.762515	0.218923	0	0.436586	0.535724	1.73206	0.309298	0.757095	NA
hsa-miR-1911-3p	0	0	0	0	0	0	0	0	0	0	0	0	0	0	NA	NA	NA	NA	NA
hsa-miR-1911-5p	0	0	0	0	0	0	0	0	0	0	0	0	0	0	NA	NA	NA	NA	NA
hsa-miR-1912-3p	0	0	0	0	0	0	0	0	0	0	0	0	0	0	NA	NA	NA	NA	NA
hsa-miR-1912-5p	0	0	0	0	0	0	0	0	0	0	0	0	0	0	NA	NA	NA	NA	NA
hsa-miR-1914-3p	0	0	0	2.47512	0	0	0.443625	0.584664	0	0	0.305006	0	0.412519	0.222216	1.52854	1.7819	0.857815	0.390995	NA
hsa-miR-1914-5p	0	0	0	0	0	0	0.443625	1.16933	2.77613	1.12394	0	1.53246	0	1.17425	-0.534651	1.53421	-0.348487	0.727475	NA
hsa-miR-1915-3p	0	0	0	0	0	0	0	0	0	0	0	0	0	0	NA	NA	NA	NA	NA
hsa-miR-1915-5p	0	0	0	0	0	0	0.665438	0.584664	0.39659	0.374645	0.305006	0	0	0.387724	0.653514	1.74579	0.374337	0.708154	NA
hsa-miR-196a-1-3p	0	0	0	0	5.57297	0	0	0	0	0	0.457509	0.875693	0.928828	0.2222	1.92915	1.83773	1.04975	0.293835	NA
hsa-miR-1973	0	0	0	0	0	0	0.443625	0	0	0	0.152503	0	0	0.0993547	1.57698	1.89799	0.830868	0.406048	NA
hsa-miR-1976	0	0	0	0	0	0	0	0	0	0	0	0	0	0	NA	NA	NA	NA	NA
hsa-miR-198	0	0	0	0	3.71531	0	0	0	0	1.12394	0	0.218923	0.619219	0.22381	1.65756	1.88255	0.880485	0.378597	NA
hsa-miR-19b-2-5p	0	0	0	0	0	0	0	0	0	0	0	0	0	0	NA	NA	NA	NA	NA
hsa-miR-200a-3p	0	4.34061	0	0	0	0	0	0.292332	0	0	1.06752	0.65677	0.723435	0.336104	1.59865	1.74056	0.918469	0.358373	NA
hsa-miR-200a-5p	0	0	0	0	0	0	0	0.584664	0.79318	0	0	0	0	0.229641	1.01276	1.89293	0.53502	0.592636	NA
hsa-miR-200b-5p	0	0	0	0	0	0	0	0	0	0	0.457509	0.437847	0	0.149226	1.31472	1.89575	0.693508	0.487991	NA
hsa-miR-200c-5p	0	0	0	0	0	0	0	0	0.39659	0	0	0	0	0.0660983	2.00138	1.90091	1.05286	0.292406	NA
hsa-miR-202-3p	0	0	0	0	0	0	0	0.292332	0	0	0	0	0	0.048722	2.00138	1.90091	1.05286	0.292406	NA
hsa-miR-202-5p	0	0	0	0	0	0	0	0	0	0	0	0	0	0	NA	NA	NA	NA	NA
hsa-miR-203a-5p	0	0	0	0	0	0	0	0	0	0	0	0	0	0	NA	NA	NA	NA	NA
hsa-miR-203b-3p	0	0	0	0	0	0	0	0	0	0	0	0	0	0	NA	NA	NA	NA	NA
hsa-miR-203b-5p	0	0	0	0	0	0	0	0	0	0	0	0	0	0	NA	NA	NA	NA	NA
hsa-miR-204-3p	0	0	0	0	0	0	0	0	0	0	0	0	0	0	NA	NA	NA	NA	NA
hsa-miR-205-3p	0	0	0	0	7.43063	0	0	0	0	0	0	0	1.23844	0	3.42442	1.89902	1.80325	0.0713483	NA
hsa-miR-2052	0	0	0	0	0	0	0	0	0	0	0	0	0	0	NA	NA	NA	NA	NA
hsa-miR-2053	0	0	0	0	0	0	0	0	0	0	0	0	0	0	NA	NA	NA	NA	NA
hsa-miR-2054	0	0	0	0	0	0	0	0	0	0	0	0	0	0	NA	NA	NA	NA	NA
hsa-miR-206	0	0	0	0	0	0	0	0	0	0	0	0	0	0	NA	NA	NA	NA	NA
hsa-miR-208a-3p	0	0	0	0	0	0	0	0	0	0	0	0	0	0	NA	NA	NA	NA	NA
hsa-miR-208a-5p	0	0	0	0	0	0	0	0	0	0	0	0	0	0	NA	NA	NA	NA	NA
hsa-miR-208b-3p	0	0	0	0	0	0	0	0	0	0	0	0	0	0	NA	NA	NA	NA	NA
hsa-miR-208b-5p	0	0	0	0	0	0	0	0	0	0	0	0	0	0	NA	NA	NA	NA	NA
hsa-miR-20b-3p	0	0	0	0	0	0	0	0	0	0	0	0	0	0	NA	NA	NA	NA	NA
hsa-miR-20b-5p	0	1.44687	0	0	0	0	0.221813	0	0.39659	0	0.305006	0	0.241145	0.153901	1.71557	1.87063	0.91711	0.359085	NA
hsa-miR-211-3p	0	0	0	0	0	0	0	0	0	0	0	0	0	0	NA	NA	NA	NA	NA
hsa-miR-211-5p	0	0	0	0	0	0	0	0.292332	0.79318	0	0	0	0	0.180919	1.21174	1.89472	0.639535	0.522475	NA
hsa-miR-2113	0	0	0	0	0	0	0	0	0	0	0	0	0	0	NA	NA	NA	NA	NA
hsa-miR-2115-5p	0	0	0	0	0	0	0	0	0	0	0	0	0	0	NA	NA	NA	NA	NA
hsa-miR-2117	0	0	0	0	0	0	0	0	0	0	0	0	0	0	NA	NA	NA	NA	NA
hsa-miR-215-3p	0	0	0	0	0	0	0	0	0	0	0	0.218923	0	0.0364872	2.00398	1.90092	1.05422	0.291783	NA
hsa-miR-216a-3p	0	0	0	0	0	0	0.443625	3.21565	0.39659	0.74929	0	0	0	0.80086	-0.0710272	1.79058	-0.0396672	0.968358	NA
hsa-miR-216a-5p	0	0	0	0	0	0	0.221813	1.46166	0	1.12394	0.152503	0	0	0.493318	0.38056	1.85027	0.205678	0.837043	NA
hsa-miR-216b-3p	0	0	0	0	0	0	0	0	0	0	0	0	0	0	NA	NA	NA	NA	NA
hsa-miR-216b-5p	0	0.723435	0	0	0	0	0	1.75399	0	0	0.152503	0.437847	0.120572	0.390724	0.764947	1.85238	0.412954	0.67964	NA
hsa-miR-217-3p	0	0	0	0	0	0	0	0.292332	0	0	0	0	0	0.048722	2.00138	1.90091	1.05286	0.292406	NA
hsa-miR-217-5p	0	0	0	0	0	0	0	1.46166	0	0	0	0	0	0.24361	0.951404	1.89244	0.50274	0.615147	NA
hsa-miR-219a-2-3p	0	0	0	0	0	0	0	0	0	0	0.152503	0	0	0.0254172	2.07732	1.90112	1.09268	0.274533	NA
hsa-miR-219b-5p	0	0	0	0	0	0	0.221813	0	0	0.374645	0.762515	1.53246	0	0.481906	0.390209	1.84288	0.211739	0.83231	NA
hsa-miR-223-5p	0	0.723435	0	0	0	0	0	0	0	0	0	0	0.120572	0	2.56349	1.90116	1.34839	0.177534	NA
hsa-miR-2276-3p	0	0	0	0	0	0	0	2.04632	0.39659	2.62252	0.610012	0.65677	0	1.05537	-0.407377	1.56436	-0.260412	0.794546	NA
hsa-miR-2276-5p	0	0	0	0	0	0	0	0	0	0	0	0	0	0	NA	NA	NA	NA	NA
hsa-miR-2278	0	0	0	0	0	0	0.221813	1.16933	0.79318	0.374645	0.762515	0.437847	0	0.626554	0.173178	1.49632	0.115736	0.907862	NA
hsa-miR-2392	0	0	0	0	0	0	0	0	0	0	0	0	0	0	NA	NA	NA	NA	NA
hsa-miR-2681-3p	0	0	0	0	0	0	0	0	0	0	0	0	0	0	NA	NA	NA	NA	NA
hsa-miR-2681-5p	0	0	0	0	0	0	0	0	0	0	0.152503	0.218923	0	0.0619044	1.80359	1.89959	0.949463	0.342385	NA
hsa-miR-2861	0	0	0	0	0	0	0	0	0	0	0	0	0	0	NA	NA	NA	NA	NA
hsa-miR-2909	0	0	0	0	0	0	0	0	0	0	0	0	0	0	NA	NA	NA	NA	NA
hsa-miR-297	0	0	0	0	0	0	0	0	0	0	0	0	0	0	NA	NA	NA	NA	NA
hsa-miR-298	0	0	0	0	0	0	0	0	0	0	0	0	0	0	NA	NA	NA	NA	NA
hsa-miR-300	0	0	0	0	0	0	0	0.292332	0	0	0	0	0	0.048722	2.00138	1.90091	1.05286	0.292406	NA
hsa-miR-302a-3p	0	0	0	0	0	0	0.443625	1.46166	1.18977	0	1.67753	0.875693	0	0.94138	-0.299134	1.53381	-0.195026	0.845372	NA
hsa-miR-302b-5p	0	0	0	0	0	0	0	0	0	0	0	0	0	0	NA	NA	NA	NA	NA
hsa-miR-302c-3p	0	0	0	0	0	0	0.443625	0	0	0	0	0.65677	0	0.183399	1.16362	1.89426	0.614286	0.539026	NA
hsa-miR-302c-5p	0	0	0	0	0	0	0	0	0	0	0	0	0	0	NA	NA	NA	NA	NA
hsa-miR-302d-5p	0	0	0	0	0	0	0	0	0	0	0	0	0	0	NA	NA	NA	NA	NA
hsa-miR-302e	0	0	0	0	0	0	0	0	0	0	0	0	0	0	NA	NA	NA	NA	NA
hsa-miR-302f	0	0	0	0	0	0	0	0	0	0	0	0	0	0	NA	NA	NA	NA	NA
hsa-miR-3059-3p	0	0	0	0	0	0	0	0	0	0	0	0	0	0	NA	NA	NA	NA	NA
hsa-miR-3059-5p	0	0	0	0	0	0	0	0	0	0	0.152503	0	0	0.0254172	2.07732	1.90112	1.09268	0.274533	NA
hsa-miR-3064-3p	0	0	0	0	0	0	0	0	0	0	0	0	0	0	NA	NA	NA	NA	NA
hsa-miR-3074-3p	0	0	0	0	0	0	1.10906	0	0.39659	0.374645	0.305006	0	0	0.364217	0.619518	1.8833	0.328954	0.742191	NA
hsa-miR-3085-3p	0	0	0	0	0	0	0	0	0	0	0	0	0	0	NA	NA	NA	NA	NA
hsa-miR-3085-5p	0	0	0	0	0	0	0	0	0	0	0	0	0	0	NA	NA	NA	NA	NA
hsa-miR-3115	0	0	0	0	0	0	0	0	0	0	0	0	0	0	NA	NA	NA	NA	NA
hsa-miR-3116	0	0	0	0	0	0	0	0	0	0	0	0	0	0	NA	NA	NA	NA	NA
hsa-miR-3117-5p	0	0	0	0	0	0	0	0	0	0	0	0	0	0	NA	NA	NA	NA	NA
hsa-miR-3118	0	0	0	0	0	0	0	0	0	0	0	0	0	0	NA	NA	NA	NA	NA
hsa-miR-3119	0	0	0	0	0	0	0	0	0	0	0	0	0	0	NA	NA	NA	NA	NA
hsa-miR-3120-3p	0	0	0	0	0	0	0	0	0	0	0	0.218923	0	0.0364872	2.00398	1.90092	1.05422	0.291783	NA
hsa-miR-3120-5p	0	0	0	0	0	0	0.221813	0.584664	0	0	0	0	0	0.134413	1.41648	1.89679	0.746777	0.455198	NA
hsa-miR-3121-3p	0	0	0	0	0	0	0.665438	0.292332	0.79318	0	0.457509	0	0	0.368076	0.620163	1.87457	0.33083	0.740773	NA
hsa-miR-3121-5p	0	0	0	0	0	0	0	0	0	0	0	0	0	0	NA	NA	NA	NA	NA
hsa-miR-3122	0	0	0	0	0	0	0	0	0	0	0.152503	0.218923	0	0.0619044	1.80359	1.89959	0.949463	0.342385	NA
hsa-miR-3123	0	0	0	0	0	0	0	0	0	0	0	0	0	0	NA	NA	NA	NA	NA
hsa-miR-3124-3p	0	0	0	0	0	0	0	0	0	0	0.305006	0	0	0.0508343	1.87324	1.90004	0.985897	0.324184	NA
hsa-miR-3126-3p	0	1.44687	0	0	0	0	0.221813	0.584664	0	0.74929	0.610012	0.218923	0.241145	0.39745	1.1041	1.54475	0.714744	0.474767	NA
hsa-miR-3127-3p	0	0	0	0	0	0	0.665438	0	0.79318	0.374645	0.915018	0.875693	0	0.603996	0.205789	1.63833	0.125609	0.900041	NA
hsa-miR-3128	0	0	0	0	0	0	0.221813	0	0	0.374645	0	0.437847	0	0.172384	1.2264	1.89486	0.647223	0.517488	NA
hsa-miR-3130-5p	0	0	0	0	0	0	0.221813	1.16933	0	0.74929	0.762515	0.875693	0	0.629773	0.161407	1.63192	0.0989064	0.921213	NA
hsa-miR-3131	0	0	0	0	0	0	0	0.292332	0	0.374645	0	0	0	0.111163	1.57938	1.89801	0.832123	0.405339	NA
hsa-miR-3132	0	0	0	0	0	0	0	0	0	0	0.152503	0	0	0.0254172	2.07732	1.90112	1.09268	0.274533	NA
hsa-miR-3133	0	0	0	0	0	0	0.887251	0.292332	0	0	0.305006	0.65677	0	0.356893	0.636111	1.87522	0.339219	0.734445	NA
hsa-miR-3134	0	0	0	0	0	0	0.665438	0	0	0	0	0	0	0.110906	1.52002	1.89758	0.801032	0.423113	NA
hsa-miR-3135a	0	0	0	0	0	0	0.665438	0	0	0	0.610012	0	0	0.212575	1.03892	1.89315	0.548777	0.583158	NA
hsa-miR-3136-3p	0	0	0	0	0	0	0	0	0	0	0	0	0	0	NA	NA	NA	NA	NA
hsa-miR-3136-5p	0	0	0	0	0	0	0.221813	0	0.79318	0	0.762515	0.65677	0	0.405713	0.542127	1.85946	0.291551	0.77063	NA
hsa-miR-3137	0	0	0	0	0	0	0	0	0	0	0	0	0	0	NA	NA	NA	NA	NA
hsa-miR-3139	0	0	0	0	0	0	0.443625	0	0	0.374645	0.305006	0	0	0.187213	1.15509	1.89418	0.609808	0.541989	NA
hsa-miR-3140-3p	0	0	0	0	0	0	0.221813	0	0	0	0	0.218923	0	0.073456	1.73678	1.89919	0.914485	0.360462	NA
hsa-miR-3140-5p	0	0	0	0	0	0	0	0	0	0	0	0	0	0	NA	NA	NA	NA	NA
hsa-miR-3141	0	0	0	0	0	0	0	0.584664	0	0	0	0.65677	0	0.206906	1.07544	1.89347	0.567974	0.570053	NA
hsa-miR-3142	0	0	0	0	0	0	0	0	0	0	0	0.218923	0	0.0364872	2.00398	1.90092	1.05422	0.291783	NA
hsa-miR-3143	0	0	0	0	0	0	0.443625	0	0	0	0	0	0	0.0739375	1.7342	1.89917	0.913135	0.361172	NA
hsa-miR-3144-3p	0	0	0	0	0	0	0	0	0	0	0	0	0	0	NA	NA	NA	NA	NA
hsa-miR-3144-5p	0	0	0	0	0	0	0	0	0	0	0	0	0	0	NA	NA	NA	NA	NA
hsa-miR-3145-3p	0	0.723435	0	0	0	0	0	0.584664	0	0	0.457509	0	0.120572	0.173695	1.39809	1.89386	0.73822	0.460381	NA
hsa-miR-3146	0	0	0	0	0	0	0.443625	0	0	0	0.610012	0	0	0.175606	1.18794	1.89449	0.627049	0.530627	NA
hsa-miR-3147	0	0	0	0	0	0	0	0	0	0	0	0	0	0	NA	NA	NA	NA	NA
hsa-miR-3148	0	0	0	0	0	0	0	0	0	0	0	0	0	0	NA	NA	NA	NA	NA
hsa-miR-3149	0	2.1703	0	0	0	0	0	0	0	0	0	0	0.361717	0	2.87319	1.90047	1.51183	0.130576	NA
hsa-miR-3150a-3p	0	0	0	0	0	0	0.221813	0.584664	0.39659	0	0.610012	0.65677	0	0.411641	0.59036	1.72445	0.342346	0.73209	NA
hsa-miR-3150a-5p	0	0	0	0	0	0	0	0.292332	0.39659	1.87323	1.06752	0.437847	0	0.677919	0.091673	1.65553	0.0553737	0.955841	NA
hsa-miR-3150b-3p	0	0	0	0	0	0	0	0	0.39659	0	0	0	0	0.0660983	2.00138	1.90091	1.05286	0.292406	NA
hsa-miR-3150b-5p	0	0	0	0	0	0	0	0	0	0	0	0	0	0	NA	NA	NA	NA	NA
hsa-miR-3151-3p	0	0	0	0	0	0	0	0	0	0	0	0	0	0	NA	NA	NA	NA	NA
hsa-miR-3151-5p	0	0	0	0	0	0	0	0	0	0	0	0	0	0	NA	NA	NA	NA	NA
hsa-miR-3153	0	0	0	0	0	0	0	0	0	0	0.152503	0	0	0.0254172	2.07732	1.90112	1.09268	0.274533	NA
hsa-miR-3156-3p	0	0	0	0	0	0	0	0	0	0	0	0	0	0	NA	NA	NA	NA	NA
hsa-miR-3156-5p	0	0	0	0	0	0	0	0	0	0	0	0	0	0	NA	NA	NA	NA	NA
hsa-miR-3158-5p	0	0	0	0	0	0	0	0	0	0	0	0	0	0	NA	NA	NA	NA	NA
hsa-miR-3159	0	0	0	0	0	0	0.665438	1.75399	0.79318	1.87323	1.52503	0.875693	0	1.24776	-0.699832	1.2846	-0.544785	0.585901	NA
hsa-miR-3160-3p	0	0	0	2.47512	0	0	0	0	0	0	0	0	0.412519	0	2.64794	1.90096	1.39295	0.163634	NA
hsa-miR-3160-5p	0	0	0	0	0	0	0	0	0	0	0	0	0	0	NA	NA	NA	NA	NA
hsa-miR-3162-3p	0	0	0	0	0	0	0	0	0	0	0	0	0	0	NA	NA	NA	NA	NA
hsa-miR-3162-5p	0	0	0	0	0	0	0	0.584664	0	0	0.762515	0.218923	0	0.261017	0.878703	1.89188	0.46446	0.642318	NA
hsa-miR-3164	0	0	0	0	0	0	0	0	0	0	0	0	0	0	NA	NA	NA	NA	NA
hsa-miR-3165	0	2.1703	0	0	0	0	0	0	0.39659	0	0	0	0.361717	0.0660983	2.46581	1.89882	1.2986	0.194081	NA
hsa-miR-3166	0	0	0	0	0	0	0	0	0	0	0	0	0	0	NA	NA	NA	NA	NA
hsa-miR-3167	0	2.89374	0	0	0	0	0.221813	0.584664	0	0	0.305006	0	0.48229	0.185247	1.91162	1.80386	1.05974	0.289264	NA
hsa-miR-3168	0	0	0	4.95023	1.85766	0	0	0	0	0	0	0.218923	1.13465	0.0364872	3.31567	1.81056	1.83129	0.0670569	NA
hsa-miR-3169	0	0	0	0	0	0	0	0	0	0	0	0	0	0	NA	NA	NA	NA	NA
hsa-miR-3171	0	0	0	0	0	0	0	0	0	0	0	0	0	0	NA	NA	NA	NA	NA
hsa-miR-3173-5p	0	0	0	0	0	0	0.443625	0.876996	2.37954	0.74929	1.98254	1.09462	0	1.25443	-0.695647	1.31592	-0.528638	0.597057	NA
hsa-miR-3178	0	0	0	0	0	0	0	0	0	0	0	0	0	0	NA	NA	NA	NA	NA
hsa-miR-3179	0	0.723435	0	0	0	0	1.33088	0	0	0.374645	1.06752	0.218923	0.120572	0.498661	0.600346	1.68871	0.355505	0.722212	NA
hsa-miR-3181	0	0	0	0	0	0	0.221813	0.292332	1.58636	0	0.457509	0.65677	0	0.535797	0.342515	1.68911	0.202778	0.839308	NA
hsa-miR-3182	0	0	0	0	0	0	0	0	0	0	0	0	0	0	NA	NA	NA	NA	NA
hsa-miR-3184-3p	0	0	0	0	0	0	0	0	0	0	0	0	0	0	NA	NA	NA	NA	NA
hsa-miR-3184-5p	0	0	0	0	0	0	0	0.876996	0	0	0.762515	0	0	0.273252	0.843863	1.89163	0.446105	0.655522	NA
hsa-miR-3185	0	0	0	0	0	0	0	0	0	0	0	0	0	0	NA	NA	NA	NA	NA
hsa-miR-3186-3p	0	0	0	0	0	0	0	0	0	0	0	0	0	0	NA	NA	NA	NA	NA
hsa-miR-3186-5p	0	0	0	0	0	0	0	0	0	0	0	0	0	0	NA	NA	NA	NA	NA
hsa-miR-3189-3p	0	0	0	0	0	0	0	0	1.18977	0.74929	0.305006	0.218923	0	0.410498	0.540551	1.86837	0.289316	0.772339	NA
hsa-miR-3189-5p	0	0	0	0	0	0	0	0	0	0	0	0	0	0	NA	NA	NA	NA	NA
hsa-miR-3190-3p	0	0	0	0	0	0	0.887251	0.584664	2.37954	0.374645	1.06752	2.40816	0	1.28363	-0.718825	1.33446	-0.538664	0.590118	NA
hsa-miR-3190-5p	0	0	0	0	0	0	0.221813	0	1.18977	0	0	0.218923	0	0.271751	0.872121	1.89183	0.460993	0.644804	NA
hsa-miR-3191-3p	0	0	0	0	0	0	0	0	0	0	0.457509	0.218923	0	0.112739	1.49893	1.89743	0.789979	0.42954	NA
hsa-miR-3191-5p	0	0	0	0	0	0	0.221813	0.292332	0.39659	0	0.457509	2.846	0	0.702374	0.0396106	1.67421	0.0236592	0.981124	NA
hsa-miR-3192-3p	0	0	0	0	0	0	0	0	0	0	0	0.437847	0	0.0729744	1.73937	1.8992	0.91584	0.359751	NA
hsa-miR-3192-5p	0	0	0	0	0	0	0.221813	0	0	1.49858	0	0	0	0.286732	0.828544	1.89152	0.438031	0.661363	NA
hsa-miR-3193	0	0	0	0	0	0	0	0.584664	0	0	0.305006	0	0	0.148278	1.33598	1.89598	0.704639	0.481035	NA
hsa-miR-3194-3p	0	0	0	0	0	0	0	0	0	0	0	0	0	0	NA	NA	NA	NA	NA
hsa-miR-3194-5p	0	0	0	0	7.43063	0	0	0	0.39659	0	0.152503	0	1.23844	0.0915155	3.04907	1.80434	1.68985	0.091056	NA
hsa-miR-3197	0	2.89374	0	0	0	0	0	0.292332	1.18977	0	1.67753	0.218923	0.48229	0.563093	0.935617	1.65044	0.566889	0.570789	NA
hsa-miR-3198	0	0	0	0	0	0	0	0.292332	0	0	0	0	0	0.048722	2.00138	1.90091	1.05286	0.292406	NA
hsa-miR-3201	0	0	0	0	0	0	0	0	0	0	0	0	0	0	NA	NA	NA	NA	NA
hsa-miR-3202	0	0	0	0	0	0	0.221813	0	0	0	0	0	0	0.0369688	2.00138	1.90091	1.05286	0.292406	NA
hsa-miR-323b-5p	0	0	0	0	0	0	0	0	0	0.374645	0	0.218923	0	0.0989281	1.66276	1.89865	0.875757	0.381162	NA
hsa-miR-325	0	0	0	0	0	0	0	0	0	0	0	0	0	0	NA	NA	NA	NA	NA
hsa-miR-338-5p	0	0	0	0	0	0	0	0	0	0	0	0	0	0	NA	NA	NA	NA	NA
hsa-miR-346	0	0	0	0	0	0	0	0.292332	0.79318	0	0.152503	0.218923	0	0.242823	0.960193	1.89251	0.507365	0.611898	NA
hsa-miR-3529-3p	0	0	0	0	0	0	0	0	0	0	0	0	0	0	NA	NA	NA	NA	NA
hsa-miR-3529-5p	0	0	0	0	0	0	0	0	0	0	0	0.218923	0	0.0364872	2.00398	1.90092	1.05422	0.291783	NA
hsa-miR-3606-3p	0	0	0	0	0	0	0	0	0	0	0	0	0	0	NA	NA	NA	NA	NA
hsa-miR-3606-5p	0	0	0	0	0	0	0	0	0	0	0	0	0	0	NA	NA	NA	NA	NA
hsa-miR-3609	0	0	0	0	0	0	0.443625	1.46166	1.18977	0	1.22002	0.437847	0	0.792154	-0.0922546	1.57871	-0.0584367	0.953401	NA
hsa-miR-3610	0	0	3.87824	0	0	0	0	0.584664	0	0	0	0.218923	0.646373	0.133931	1.803	1.87431	0.961952	0.336074	NA
hsa-miR-3611	0	0.723435	0	0	0	0	0.443625	0	0	0	0	0.218923	0.120572	0.110425	1.73254	1.89691	0.913351	0.361058	NA
hsa-miR-3612	0	0	0	0	0	0	0	0	0	0	0	0	0	0	NA	NA	NA	NA	NA
hsa-miR-3614-3p	0	0	0	0	0	0	0	0	0	0	0	0	0	0	NA	NA	NA	NA	NA
hsa-miR-3614-5p	0	0	0	0	0	0	0	0	0	0.374645	0.152503	0.218923	0	0.124345	1.47373	1.89725	0.776772	0.437293	NA
hsa-miR-3616-3p	0	0	0	0	0	0	0	0	0	0	0	0	0	0	NA	NA	NA	NA	NA
hsa-miR-3616-5p	0	0	0	0	0	0	0	0	0	0	0	0	0	0	NA	NA	NA	NA	NA
hsa-miR-3617-3p	0	0	0	0	0	0	0	0	0	0	0	0	0	0	NA	NA	NA	NA	NA
hsa-miR-3617-5p	0	0	0	0	0	0	0.443625	0.292332	0.39659	0.374645	1.22002	0.875693	0	0.600485	0.203716	1.51248	0.13469	0.892857	NA
hsa-miR-3618	0	0	0	0	0	0	0	0	0	0	0	0	0	0	NA	NA	NA	NA	NA
hsa-miR-3619-3p	0	0	0	0	0	0	0	0.292332	0.39659	0.374645	0.305006	0.875693	0	0.374044	0.679878	1.76049	0.386186	0.699359	NA
hsa-miR-362-3p	0	2.89374	0	0	0	0	0	0	0	0.74929	0	0	0.48229	0.124882	2.05594	1.89495	1.08496	0.27794	NA
hsa-miR-3621	0	0	0	0	0	0	0	0	0	0	0	0	0	0	NA	NA	NA	NA	NA
hsa-miR-3622b-3p	0	0	0	0	0	0	0	0	0	0	0	0	0	0	NA	NA	NA	NA	NA
hsa-miR-3622b-5p	0	0	0	0	0	0	0	0	0	0	0	0	0	0	NA	NA	NA	NA	NA
hsa-miR-363-3p	0	0	0	0	0	0	0	0.292332	2.37954	1.49858	0.762515	0	0	0.822161	-0.0938837	1.76918	-0.0530662	0.957679	NA
hsa-miR-363-5p	0	0	0	0	0	0	0	0	0	0	0	0	0	0	NA	NA	NA	NA	NA
hsa-miR-3646	0	0	0	0	0	0	0	0	0	0	0	0	0	0	NA	NA	NA	NA	NA
hsa-miR-3649	0	0	0	0	0	0	0	0	0	0	0	0	0	0	NA	NA	NA	NA	NA
hsa-miR-3650	0	0	0	0	0	0	0	0	0	0	0	0	0	0	NA	NA	NA	NA	NA
hsa-miR-3652	0	0.723435	0	0	0	0	0.221813	0.584664	0	0.374645	0.457509	0	0.120572	0.273105	1.19732	1.7564	0.681691	0.495434	NA
hsa-miR-3655	0	0	0	0	0	0	0	0.584664	0	0	0	0	0	0.097444	1.60981	1.89824	0.848052	0.396409	NA
hsa-miR-3657	0	0	0	0	0	0	0	0	0	0	0	0	0	0	NA	NA	NA	NA	NA
hsa-miR-3658	0	0	0	0	0	0	0	0	0	0	0	0	0	0	NA	NA	NA	NA	NA
hsa-miR-3659	0	0	0	0	0	0	0.665438	0.584664	0.79318	0.374645	0.305006	0	0	0.453822	0.510379	1.71183	0.298149	0.765589	NA
hsa-miR-3660	0	0	0	0	0	0	0	0	0	0	0	0	0	0	NA	NA	NA	NA	NA
hsa-miR-3662	0	0	0	0	0	0	0	0	0	0	0.762515	0	0	0.127086	1.4221	1.89684	0.749721	0.453423	NA
hsa-miR-3663-3p	0	0	0	0	0	0	0	0	0	0	0	0	0	0	NA	NA	NA	NA	NA
hsa-miR-3663-5p	0	0	0	0	0	0	0.221813	0	0	0	0	0.218923	0	0.073456	1.73678	1.89919	0.914485	0.360462	NA
hsa-miR-3664-5p	0	0	0	0	0	0	0	0	0	0	0	0	0	0	NA	NA	NA	NA	NA
hsa-miR-3665	0	0	0	0	0	0	0	0	0	0	0	0	0	0	NA	NA	NA	NA	NA
hsa-miR-3666	0	0	0	0	0	0	0	0	0	0	0	0	0	0	NA	NA	NA	NA	NA
hsa-miR-3667-3p	0	0	0	0	0	0	0	0	0	0	0	0	0	0	NA	NA	NA	NA	NA
hsa-miR-3667-5p	0	0	0	0	0	0	0	0	0	0	0	0	0	0	NA	NA	NA	NA	NA
hsa-miR-3668	0	0	0	0	0	0	0	0	0	0	0	0	0	0	NA	NA	NA	NA	NA
hsa-miR-367-3p	0	0	0	0	0	0	0	0	0	0	0	0	0	0	NA	NA	NA	NA	NA
hsa-miR-367-5p	0	0	0	0	0	0	0	0	0	0	0	0	0	0	NA	NA	NA	NA	NA
hsa-miR-3670	0	0	0	0	0	0	0	0	0	0	0	0	0	0	NA	NA	NA	NA	NA
hsa-miR-3671	0	0	0	0	0	0	0	0	0	0	0	0	0	0	NA	NA	NA	NA	NA
hsa-miR-3672	0	0	0	0	0	0	0	0	0	0	0	0	0	0	NA	NA	NA	NA	NA
hsa-miR-3674	0	0	0	0	0	0	0	0	0	0	0	0	0	0	NA	NA	NA	NA	NA
hsa-miR-3675-3p	0	0	0	0	0	0	0	0	0	0	0	0	0	0	NA	NA	NA	NA	NA
hsa-miR-3675-5p	0	0	0	0	0	0	0	0.876996	0	0	1.22002	3.28385	0	0.896812	-0.171885	1.86857	-0.0919871	0.926708	NA
hsa-miR-3677-5p	0	0	0	0	0	0	0	0	0	0	0	0	0	0	NA	NA	NA	NA	NA
hsa-miR-3678-3p	0	0	0	0	0	0	0	0	0	0	0	0	0	0	NA	NA	NA	NA	NA
hsa-miR-3678-5p	0	0	0	0	0	0	0	1.46166	0	0	0.457509	0	0	0.319861	0.719662	1.89077	0.380618	0.703486	NA
hsa-miR-3679-3p	0	0	0	0	0	0	0	0	0	0	0	0	0	0	NA	NA	NA	NA	NA
hsa-miR-3679-5p	0	0	0	0	0	0	0	0	0.79318	0	1.06752	0.218923	0	0.346604	0.651271	1.89034	0.344527	0.73045	NA
hsa-miR-3680-3p	0	0	0	0	0	0	0	0	0	0.74929	0	0	0	0.124882	1.5235	1.8976	0.802855	0.422059	NA
hsa-miR-3680-5p	0	0	0	0	0	0	0.221813	0	0	0	0	0	0	0.0369688	2.00138	1.90091	1.05286	0.292406	NA
hsa-miR-3681-3p	0	0	0	0	0	0	0	0	0	0	0	0	0	0	NA	NA	NA	NA	NA
hsa-miR-3681-5p	0	0	0	0	0	0	0	0	0	0	0	0	0	0	NA	NA	NA	NA	NA
hsa-miR-3682-3p	0	0	0	0	0	0	0	0	0	0.374645	0.610012	0.875693	0	0.310058	0.740014	1.89091	0.391354	0.695535	NA
hsa-miR-3682-5p	0	0	0	0	0	0	0	0	0	0	0	0	0	0	NA	NA	NA	NA	NA
hsa-miR-3683	0	0	0	0	0	0	0	0	0	0	0	0	0	0	NA	NA	NA	NA	NA
hsa-miR-3685	0	0	0	0	0	0	0	0	0	0	0.305006	0	0	0.0508343	1.87324	1.90004	0.985897	0.324184	NA
hsa-miR-3686	0	0	0	0	0	0	0	0	0	0	0	0	0	0	NA	NA	NA	NA	NA
hsa-miR-3688-3p	0	1.44687	0	0	5.57297	0	0.443625	0	0	0	0.457509	0.218923	1.16997	0.186676	2.71951	1.51595	1.79392	0.0728252	NA
hsa-miR-3688-5p	0	0	0	0	0	0	0	0	0	0	0	0	0	0	NA	NA	NA	NA	NA
hsa-miR-3689a-3p	0	0	0	0	0	0	0	0	0	0	0	0	0	0	NA	NA	NA	NA	NA
hsa-miR-3689a-5p	0	0	0	0	0	0	0	0	0	0	0	0	0	0	NA	NA	NA	NA	NA
hsa-miR-3689b-3p	0	0	0	0	0	0	0	0	0	0	0	0	0	0	NA	NA	NA	NA	NA
hsa-miR-3689b-5p	0	0	0	0	0	0	0	0	0	0	0	0	0	0	NA	NA	NA	NA	NA
hsa-miR-3689c	0	0	0	0	0	0	0	0	0	0	0	0	0	0	NA	NA	NA	NA	NA
hsa-miR-3689d	0	0	0	0	0	0	0	0	0	0	0	0	0	0	NA	NA	NA	NA	NA
hsa-miR-3689e	0	0	0	0	0	0	0	0	0	0	0	0	0	0	NA	NA	NA	NA	NA
hsa-miR-3689f	0	0	0	0	0	0	0	0	0	0	0	0	0	0	NA	NA	NA	NA	NA
hsa-miR-3690	0	0	0	0	0	0	0	0	0	0	0	0	0	0	NA	NA	NA	NA	NA
hsa-miR-3691-3p	0	0	0	0	0	0	0.443625	1.46166	0.39659	0.374645	0.610012	0.65677	0	0.657217	0.111456	1.4784	0.0753896	0.939905	NA
hsa-miR-3692-3p	0	0	0	0	0	0	0.221813	0	0	0	0	0	0	0.0369688	2.00138	1.90091	1.05286	0.292406	NA
hsa-miR-3692-5p	0	0	0	0	0	0	0	0	0	0	0	0	0	0	NA	NA	NA	NA	NA
hsa-miR-3713	0	0	0	0	0	0	0	0	0	0	0	0	0	0	NA	NA	NA	NA	NA
hsa-miR-3714	0	0	0	0	0	0	0	0	0	0	0	0	0	0	NA	NA	NA	NA	NA
hsa-miR-371a-3p	0	0	0	0	0	0	0	0.292332	0	0	0	0	0	0.048722	2.00138	1.90091	1.05286	0.292406	NA
hsa-miR-371a-5p	0	0.723435	0	0	0	0	0	3.80032	0	0.74929	0.152503	0	0.120572	0.783685	0.127078	1.80131	0.0705473	0.943758	NA
hsa-miR-371b-3p	0	0	0	0	0	0	0	0	0	0	0	0	0	0	NA	NA	NA	NA	NA
hsa-miR-371b-5p	0	0	0	0	0	0	0	0	0	0	0	0	0	0	NA	NA	NA	NA	NA
hsa-miR-372-3p	0	0	0	7.42535	0	0	0	0.584664	0	0	0	0	1.23756	0.097444	2.58785	1.89371	1.36655	0.171766	NA
hsa-miR-372-5p	0	0	0	0	0	0	0	0	0	0	0	0	0	0	NA	NA	NA	NA	NA
hsa-miR-373-5p	0	0	0	0	0	0	0	0	0	0	0	0	0	0	NA	NA	NA	NA	NA
hsa-miR-374c-3p	0	0	0	0	0	0	0	0	0	0	0	0	0	0	NA	NA	NA	NA	NA
hsa-miR-374c-5p	0	0	0	0	1.85766	0	0.221813	0.292332	0	0	0	0	0.309609	0.0856908	1.99796	1.89754	1.05292	0.292377	NA
hsa-miR-375-5p	0	0	0	0	0	0	0	0	0	0	0	0	0	0	NA	NA	NA	NA	NA
hsa-miR-376b-5p	0	0	0	0	0	0	1.55269	0	0	0.374645	0.152503	0.218923	0	0.383127	0.571293	1.88379	0.303267	0.761686	NA
hsa-miR-376c-5p	0	0	0	0	0	0	1.55269	0	0	0.374645	0.152503	0.218923	0	0.383127	0.571293	1.88379	0.303267	0.761686	NA
hsa-miR-378b	0	0	0	0	1.85766	0	0	0.292332	0	0	0.152503	0	0.309609	0.0741392	2.0653	1.89805	1.08812	0.276544	NA
hsa-miR-378e	0	0	0	0	0	0	0	0	0	0	0	0	0	0	NA	NA	NA	NA	NA
hsa-miR-378h	0	0	3.87824	2.47512	0	0	0	0	0.39659	0	0.152503	0	1.05889	0.0915155	2.99237	1.68911	1.77157	0.0764666	NA
hsa-miR-378j	0	0	0	0	0	0	0	0	0	0	0.152503	0	0	0.0254172	2.07732	1.90112	1.09268	0.274533	NA
hsa-miR-380-5p	0	2.89374	0	0	0	0	0.443625	0.292332	1.58636	0.374645	0	0.218923	0.48229	0.485981	1.19975	1.55149	0.773285	0.439354	NA
hsa-miR-383-3p	0	0	0	0	0	0	0.443625	0	0	0	0	0	0	0.0739375	1.7342	1.89917	0.913135	0.361172	NA
hsa-miR-383-5p	0	0.723435	0	0	0	0	55.0095	2.04632	2.37954	2.62252	5.0326	7.44339	0.120572	12.4223	-3.43396	1.15455	-2.97428	NA	NA
hsa-miR-384	0	0	0	0	0	0	0	0	0	0	0	0	0	0	NA	NA	NA	NA	NA
hsa-miR-3907	0	0	0	0	0	0	0	0	0.79318	0	0.610012	0	0	0.233865	0.98362	1.8927	0.519693	0.603278	NA
hsa-miR-3908	0	0	0	0	0	0	0	0	0	0	0	0	0	0	NA	NA	NA	NA	NA
hsa-miR-3910	0	0	0	0	0	0	0	0	0	0	0	0.437847	0	0.0729744	1.73937	1.8992	0.91584	0.359751	NA
hsa-miR-3912-5p	0	0	0	0	0	0	0.443625	0	0	0	0	0	0	0.0739375	1.7342	1.89917	0.913135	0.361172	NA
hsa-miR-3914	0	0	0	0	0	0	0	0	0	0	0	0	0	0	NA	NA	NA	NA	NA
hsa-miR-3915	0	0	0	0	0	0	0	0	0	0	0	0	0	0	NA	NA	NA	NA	NA
hsa-miR-3916	0	0	0	0	0	0	0.221813	2.33866	1.58636	0.74929	0.915018	1.53246	0	1.22393	-0.652114	1.34687	-0.484171	0.628265	NA
hsa-miR-3917	0	0	0	0	0	0	0	0	0.39659	0	0	0	0	0.0660983	2.00138	1.90091	1.05286	0.292406	NA
hsa-miR-3919	0	0	0	0	0	0	0.221813	0	0	0	0	0	0	0.0369688	2.00138	1.90091	1.05286	0.292406	NA
hsa-miR-3920	0	0	0	0	0	0	0	0	0	0	0	0	0	0	NA	NA	NA	NA	NA
hsa-miR-3921	0	2.1703	0	0	0	0	0	0.292332	0	0	0	0	0.361717	0.048722	2.46581	1.89882	1.2986	0.194081	NA
hsa-miR-3922-3p	0	0	0	0	0	0	0	0.292332	0	0	0	0.218923	0	0.0852092	1.67414	1.89874	0.881711	0.377933	NA
hsa-miR-3922-5p	0	0	0	0	0	0	0	0	0	0	0	0.218923	0	0.0364872	2.00398	1.90092	1.05422	0.291783	NA
hsa-miR-3923	0	0	0	0	0	0	0	0	0	0	0	0	0	0	NA	NA	NA	NA	NA
hsa-miR-3924	0	0	0	0	0	0	0	0	0	0	0	0	0	0	NA	NA	NA	NA	NA
hsa-miR-3925-3p	0	0	0	0	0	0	0	0	0	0	0	0	0	0	NA	NA	NA	NA	NA
hsa-miR-3925-5p	0	0	0	0	0	0	0	0	0	0	0	0	0	0	NA	NA	NA	NA	NA
hsa-miR-3926	0	0	0	0	0	0	0	0	0	0	0	0	0	0	NA	NA	NA	NA	NA
hsa-miR-3927-3p	0	0	0	0	0	0	0	0	0	0	0	0	0	0	NA	NA	NA	NA	NA
hsa-miR-3927-5p	0	0	0	0	0	0	0	0	0	0	0	0	0	0	NA	NA	NA	NA	NA
hsa-miR-3928-5p	0	0	0	0	0	0	0	0	0	0	0	0	0	0	NA	NA	NA	NA	NA
hsa-miR-3929	0	0.723435	0	0	0	0	0.665438	0.876996	1.58636	0.374645	1.37253	1.09462	0.120572	0.995097	-0.159986	1.25262	-0.127721	0.89837	NA
hsa-miR-3934-3p	0	0	0	0	0	0	0	0	0	0	0	0	0	0	NA	NA	NA	NA	NA
hsa-miR-3936	0	0	0	0	0	0	0.443625	0.584664	1.98295	0.74929	0.457509	0	0	0.703006	0.0620953	1.63022	0.0380903	0.969616	NA
hsa-miR-3937	0	0	0	0	0	0	0	0	0	0	0	0	0	0	NA	NA	NA	NA	NA
hsa-miR-3938	0	0	0	0	0	0	0	0	0	0	0	0	0	0	NA	NA	NA	NA	NA
hsa-miR-3941	0	0	0	0	0	0	0	0	0	0	0	0	0	0	NA	NA	NA	NA	NA
hsa-miR-3942-3p	0	0	0	0	0	0	0	0	0	0	0	0	0	0	NA	NA	NA	NA	NA
hsa-miR-3942-5p	0	1.44687	0	0	0	0	0.443625	0	0	0	0.762515	0	0.241145	0.201023	1.4092	1.89225	0.744721	0.456441	NA
hsa-miR-3943	0	0	0	0	0	0	0	0	0	0	0	0	0	0	NA	NA	NA	NA	NA
hsa-miR-3944-5p	0	0	0	0	0	0	0.443625	0.584664	0	0	0.305006	0.218923	0	0.258703	0.890117	1.89197	0.470472	0.638018	NA
hsa-miR-3945	0	0	0	0	0	0	0	0	0	0	0	0	0	0	NA	NA	NA	NA	NA
hsa-miR-3972	0	0	0	0	0	0	0	0	0	0	0	0	0	0	NA	NA	NA	NA	NA
hsa-miR-3973	0	0	0	0	0	0	0	0	0	0	0	0	0	0	NA	NA	NA	NA	NA
hsa-miR-3974	0	0	0	0	0	0	0	0	0	0	0	0	0	0	NA	NA	NA	NA	NA
hsa-miR-3975	0	0	0	0	0	0	0	0	0	0	0	0	0	0	NA	NA	NA	NA	NA
hsa-miR-3976	0	0	0	0	0	0	0	0	0	0	0	0	0	0	NA	NA	NA	NA	NA
hsa-miR-3977	0	0	0	0	0	0	0	0	0	0	0	0	0	0	NA	NA	NA	NA	NA
hsa-miR-3978	0	0	0	0	0	0	0	0	0	0	0	0	0	0	NA	NA	NA	NA	NA
hsa-miR-422a	0	0.723435	3.87824	0	0	0	0	0.584664	0.79318	0	0.762515	0	0.766946	0.356726	1.43224	1.57483	0.90946	0.363107	NA
hsa-miR-4251	0	0	0	0	0	0	0	0	0	0	0	0	0	0	NA	NA	NA	NA	NA
hsa-miR-4252	0	0	0	0	0	0	0	0	0	0	0	0	0	0	NA	NA	NA	NA	NA
hsa-miR-4253	0	0	0	0	0	0	0	0	0	0	0	0	0	0	NA	NA	NA	NA	NA
hsa-miR-4254	0	0	0	0	0	0	0	0	0.79318	0	0	0	0	0.132197	1.5235	1.8976	0.802855	0.422059	NA
hsa-miR-4255	0	0	0	0	0	0	0	0	0	0	0	0	0	0	NA	NA	NA	NA	NA
hsa-miR-4256	0	0	0	0	0	0	0	0	0	0	0	0	0	0	NA	NA	NA	NA	NA
hsa-miR-4257	0	0	0	0	0	0	0	0	0	0	0	0	0	0	NA	NA	NA	NA	NA
hsa-miR-4258	0	0	0	0	0	0	0	0	0	0	0	0	0	0	NA	NA	NA	NA	NA
hsa-miR-4259	0	0	0	0	0	0	0	0	0	0	0	0	0	0	NA	NA	NA	NA	NA
hsa-miR-4260	0	0	0	0	0	0	0	0	0	0	0	0	0	0	NA	NA	NA	NA	NA
hsa-miR-4261	0	0	0	0	0	0	0	0	0	0	0	0	0	0	NA	NA	NA	NA	NA
hsa-miR-4262	0	0	0	0	0	0	0	0	0	0	0	0	0	0	NA	NA	NA	NA	NA
hsa-miR-4263	0	0	0	0	0	0	0	0	0	0	0	0	0	0	NA	NA	NA	NA	NA
hsa-miR-4264	0	0	0	0	0	0	0	0	0	0	0	0	0	0	NA	NA	NA	NA	NA
hsa-miR-4265	0	0	0	0	0	0	0	0	0	0	0	0	0	0	NA	NA	NA	NA	NA
hsa-miR-4266	0	0	0	0	0	0	0	0	0	0	0	0	0	0	NA	NA	NA	NA	NA
hsa-miR-4267	0	0	0	0	0	0	0	0	0	0	0	0	0	0	NA	NA	NA	NA	NA
hsa-miR-4268	0	0	0	0	0	0	0	0	0	0	0	0	0	0	NA	NA	NA	NA	NA
hsa-miR-4269	0	0	0	0	0	0	0	0	0	0	0	0	0	0	NA	NA	NA	NA	NA
hsa-miR-4270	0	0	0	0	0	0	0	0	0	0	0	0	0	0	NA	NA	NA	NA	NA
hsa-miR-4271	0	0	0	0	0	0	0	0	0	0	0	0	0	0	NA	NA	NA	NA	NA
hsa-miR-4272	0	0	0	0	0	0	0	0	0	0	0	0	0	0	NA	NA	NA	NA	NA
hsa-miR-4273	0	0	0	0	0	0	0	0	0	0	0	0	0	0	NA	NA	NA	NA	NA
hsa-miR-4274	0	0	0	0	0	0	0	0	0	0	0	0	0	0	NA	NA	NA	NA	NA
hsa-miR-4275	0	0	0	0	0	0	0	0	0	0	0	0	0	0	NA	NA	NA	NA	NA
hsa-miR-4276	0	0	0	0	0	0	0	0	0	0	0	0	0	0	NA	NA	NA	NA	NA
hsa-miR-4277	0	0	0	0	0	0	0	0	0	0	0	0	0	0	NA	NA	NA	NA	NA
hsa-miR-4278	0	0	0	0	0	0	0	0	0	0	0	0	0	0	NA	NA	NA	NA	NA
hsa-miR-4279	0	0	0	0	0	0	0	0	0	0	0	0	0	0	NA	NA	NA	NA	NA
hsa-miR-4280	0	0	0	0	0	0	0	0	0	0	0	0	0	0	NA	NA	NA	NA	NA
hsa-miR-4281	0	0	0	0	0	0	0	0	0	0	0	0	0	0	NA	NA	NA	NA	NA
hsa-miR-4282	0	0	0	0	0	0	0	0	0	0	0	0	0	0	NA	NA	NA	NA	NA
hsa-miR-4283	0	0	0	0	0	0	0	0	0	0	0	0	0	0	NA	NA	NA	NA	NA
hsa-miR-4285	0	0	0	0	0	0	0	0	0	0	0	0	0	0	NA	NA	NA	NA	NA
hsa-miR-4287	0	0	0	0	0	0	0	0	0	0	0	0	0	0	NA	NA	NA	NA	NA
hsa-miR-4288	0	0	0	0	0	0	0	0	0	0	0	0	0	0	NA	NA	NA	NA	NA
hsa-miR-4289	0	0	0	0	0	0	0	0	0	0	0	0	0	0	NA	NA	NA	NA	NA
hsa-miR-4290	0	0	0	0	0	0	0	0	0	0	0	0	0	0	NA	NA	NA	NA	NA
hsa-miR-4291	0	0	0	0	0	0	0	0	0	0	0	0	0	0	NA	NA	NA	NA	NA
hsa-miR-4292	0	0	0	0	0	0	0	0	0	0	0	0	0	0	NA	NA	NA	NA	NA
hsa-miR-4293	0	0	0	0	0	0	0	0	0	0	0	0	0	0	NA	NA	NA	NA	NA
hsa-miR-4294	0	0	0	0	0	0	0	0	0	0	0	0	0	0	NA	NA	NA	NA	NA
hsa-miR-4295	0	0	0	0	0	0	0	0	0	0	0	0	0	0	NA	NA	NA	NA	NA
hsa-miR-4296	0	0	0	0	0	0	0	0	0	0	0	0	0	0	NA	NA	NA	NA	NA
hsa-miR-4297	0	0	0	0	0	0	0	0	0	0	0	0	0	0	NA	NA	NA	NA	NA
hsa-miR-4298	0	0	0	0	0	0	0	0	0	0	0	0	0	0	NA	NA	NA	NA	NA
hsa-miR-4299	0	0	0	0	0	0	0	0	0	0	0	0	0	0	NA	NA	NA	NA	NA
hsa-miR-4300	0	0	0	0	0	0	0	0	0	0	0	0	0	0	NA	NA	NA	NA	NA
hsa-miR-4302	0	0	0	0	0	0	0	0	0	0	0	0	0	0	NA	NA	NA	NA	NA
hsa-miR-4303	0	0	0	0	0	0	0	0	0	0	0	0	0	0	NA	NA	NA	NA	NA
hsa-miR-4304	0	0	0	0	0	0	0	0	0	0	0	0	0	0	NA	NA	NA	NA	NA
hsa-miR-4305	0	0	0	0	0	0	0	0	0	0	0	0	0	0	NA	NA	NA	NA	NA
hsa-miR-4306	0	0	0	0	0	0	0	0	0	0	0	0	0	0	NA	NA	NA	NA	NA
hsa-miR-4307	0	0	0	0	0	0	0	0	0	0	0	0	0	0	NA	NA	NA	NA	NA
hsa-miR-4308	0	0	0	0	0	0	0	0	0	0	0	0	0	0	NA	NA	NA	NA	NA
hsa-miR-4309	0	0	0	0	0	0	0	0	0	0	0	0	0	0	NA	NA	NA	NA	NA
hsa-miR-4310	0	0	0	0	0	0	0	0	0	0	0	0	0	0	NA	NA	NA	NA	NA
hsa-miR-4311	0	0	0	0	0	0	0	0	0	0	0	0	0	0	NA	NA	NA	NA	NA
hsa-miR-4312	0	0	0	0	0	0	0	0	0	0	0	0	0	0	NA	NA	NA	NA	NA
hsa-miR-4313	0	0	0	0	0	0	0	0	0	0	0	0	0	0	NA	NA	NA	NA	NA
hsa-miR-4314	0	0	0	0	0	0	0	0	0	0	0	0	0	0	NA	NA	NA	NA	NA
hsa-miR-4315	0	0	0	0	0	0	0	0	0	0	0	0	0	0	NA	NA	NA	NA	NA
hsa-miR-4316	0	0	0	0	0	0	0	0	0	0	0	0	0	0	NA	NA	NA	NA	NA
hsa-miR-4317	0	0	0	0	0	0	0	0	0	0	0	0	0	0	NA	NA	NA	NA	NA
hsa-miR-4318	0	0	0	0	0	0	0	0	0	0	0	0	0	0	NA	NA	NA	NA	NA
hsa-miR-4319	0	0	0	0	0	0	0	0	0	0	0	0	0	0	NA	NA	NA	NA	NA
hsa-miR-4320	0	0	0	0	0	0	0	0	0	0	0	0	0	0	NA	NA	NA	NA	NA
hsa-miR-4321	0	0	0	0	0	0	0	0	0	0	0	0	0	0	NA	NA	NA	NA	NA
hsa-miR-4322	0	0	0	0	0	0	0	0	0	0	0	0	0	0	NA	NA	NA	NA	NA
hsa-miR-4323	0	0	0	0	0	0	0	0	0	0	0	0	0	0	NA	NA	NA	NA	NA
hsa-miR-4324	0	0	0	0	0	0	0	0	0	0	0	0	0	0	NA	NA	NA	NA	NA
hsa-miR-4325	0	0	0	0	0	0	0	0	0	0	0	0	0	0	NA	NA	NA	NA	NA
hsa-miR-4327	0	0	0	0	0	0	0	0	0	0	0	0	0	0	NA	NA	NA	NA	NA
hsa-miR-4328	0	0	0	0	0	0	0	0	0	0	0	0	0	0	NA	NA	NA	NA	NA
hsa-miR-4329	0	0	0	0	0	0	0	0	0	0	0	0	0	0	NA	NA	NA	NA	NA
hsa-miR-4330	0	0	0	0	0	0	0	0	0	0	0	0	0	0	NA	NA	NA	NA	NA
hsa-miR-4418	0	0	0	0	0	0	0	0	0	0	0	0	0	0	NA	NA	NA	NA	NA
hsa-miR-4420	0	0	0	0	0	0	0	0	0	0	0	0	0	0	NA	NA	NA	NA	NA
hsa-miR-4422	0	0	0	0	0	0	0	0	0	0	0	0	0	0	NA	NA	NA	NA	NA
hsa-miR-4423-3p	0	0	0	0	0	0	1.55269	0	0	0	0.610012	0	0	0.36045	0.610791	1.89009	0.323155	0.746578	NA
hsa-miR-4423-5p	0	0	0	0	0	0	0.221813	0	0	0	0	0	0	0.0369688	2.00138	1.90091	1.05286	0.292406	NA
hsa-miR-4424	0	1.44687	0	0	0	0	0	0	0	0	0	0.437847	0.241145	0.0729744	2.11563	1.8979	1.11472	0.264969	NA
hsa-miR-4425	0	0	0	0	0	0	0	0	0	0	0	0	0	0	NA	NA	NA	NA	NA
hsa-miR-4427	0	0	0	0	0	0	0	0	0	0	0	0	0	0	NA	NA	NA	NA	NA
hsa-miR-4428	0	0	0	0	0	0	0	0	0	0	0	0	0	0	NA	NA	NA	NA	NA
hsa-miR-4430	0	0	0	0	0	0	0	0	0	0	0	0	0	0	NA	NA	NA	NA	NA
hsa-miR-4431	0	0	0	0	0	0	0	0	0	0	0	0	0	0	NA	NA	NA	NA	NA
hsa-miR-4432	0	0	0	0	0	0	0	0	0	0	0	0	0	0	NA	NA	NA	NA	NA
hsa-miR-4433a-3p	0	0	0	0	0	0	0	0	0	0	0	0	0	0	NA	NA	NA	NA	NA
hsa-miR-4433a-5p	0	0	0	0	0	0	0	0	0	0	0	0	0	0	NA	NA	NA	NA	NA
hsa-miR-4433b-3p	0	0	0	0	0	0	0	0	0	0	0	0	0	0	NA	NA	NA	NA	NA
hsa-miR-4433b-5p	0	0	0	0	0	0	0	0	0	0	0	0	0	0	NA	NA	NA	NA	NA
hsa-miR-4434	0	0	0	0	0	0	0	0	0	0	0	0	0	0	NA	NA	NA	NA	NA
hsa-miR-4436a	0	0	0	0	0	0	0	0	0	0	0	0	0	0	NA	NA	NA	NA	NA
hsa-miR-4436b-3p	0	2.89374	0	0	0	0	0	0.292332	0.79318	0	0.762515	0.875693	0.48229	0.453953	1.18578	1.6354	0.725074	0.468406	NA
hsa-miR-4436b-5p	0	0	0	0	0	0	0	0	0	0	0	0	0	0	NA	NA	NA	NA	NA
hsa-miR-4437	0	0	0	0	0	0	0	0	0	0	0	0	0	0	NA	NA	NA	NA	NA
hsa-miR-4438	0	0	0	0	0	0	0	0	0	0	0	0	0	0	NA	NA	NA	NA	NA
hsa-miR-4439	0	0	0	0	0	0	0.221813	0	0	0	0	0	0	0.0369688	2.00138	1.90091	1.05286	0.292406	NA
hsa-miR-4440	0	0	0	0	0	0	0.443625	0.876996	0.39659	1.87323	0.762515	3.50277	0	1.30929	-0.736595	1.36267	-0.540554	0.588815	NA
hsa-miR-4441	0	0	0	0	0	0	0	0	0	0	0	0	0	0	NA	NA	NA	NA	NA
hsa-miR-4442	0	0	0	0	0	0	0	0	0	0.374645	0	0	0	0.0624408	2.00138	1.90091	1.05286	0.292406	NA
hsa-miR-4443	0	0	0	0	0	0	0	0	0.39659	0	0	0.218923	0	0.102586	1.66276	1.89865	0.875757	0.381162	NA
hsa-miR-4444	0	0	0	0	0	0	0	0	0	0	0	0	0	0	NA	NA	NA	NA	NA
hsa-miR-4445-3p	0	0	0	0	0	0	0	0	0	0	0	0	0	0	NA	NA	NA	NA	NA
hsa-miR-4445-5p	0	0	0	0	0	0	0	0	0	0	0	0	0	0	NA	NA	NA	NA	NA
hsa-miR-4446-3p	0	0	0	0	0	0	0	0	0	0	0	0	0	0	NA	NA	NA	NA	NA
hsa-miR-4446-5p	0	0	0	0	0	0	0	0	0	0	0	0	0	0	NA	NA	NA	NA	NA
hsa-miR-4447	0	0	0	0	0	0	0	0	0	0	0	0	0	0	NA	NA	NA	NA	NA
hsa-miR-4450	0	0	0	0	0	0	0	0	0	0	0	0	0	0	NA	NA	NA	NA	NA
hsa-miR-4452	0	0	0	0	0	0	0	0	0	0	0	0	0	0	NA	NA	NA	NA	NA
hsa-miR-4453	0	0	0	0	0	0	0	0	0	0	0	0	0	0	NA	NA	NA	NA	NA
hsa-miR-4455	0	0	0	0	0	0	0	0	0	0	0.152503	0	0	0.0254172	2.07732	1.90112	1.09268	0.274533	NA
hsa-miR-4456	0	0	0	0	0	0	0	0	0	0	0	0	0	0	NA	NA	NA	NA	NA
hsa-miR-4457	0	0	0	0	0	0	0	0	0	0	0	0	0	0	NA	NA	NA	NA	NA
hsa-miR-4460	0	0	0	0	0	0	0	0	0	0	0	0	0	0	NA	NA	NA	NA	NA
hsa-miR-4462	0	0	0	0	0	0	0	0	0	0	0	0	0	0	NA	NA	NA	NA	NA
hsa-miR-4463	0	0	0	0	0	0	0	0	0.39659	0	0.152503	0.437847	0	0.16449	1.26418	1.89523	0.667032	0.504752	NA
hsa-miR-4464	0	0	0	0	0	0	0	0	0	0	0	0	0	0	NA	NA	NA	NA	NA
hsa-miR-4465	0	0	0	0	0	0	0	0	0	0	0	0	0	0	NA	NA	NA	NA	NA
hsa-miR-4468	0	0	0	0	0	0	0	0	0	0	0	0	0	0	NA	NA	NA	NA	NA
hsa-miR-4469	0	0.723435	0	0	0	0	0	0	0.39659	0	0	0.218923	0.120572	0.102586	1.85624	1.89774	0.97813	0.32801	NA
hsa-miR-4470	0	0	0	0	0	0	0	0	0	0	0	0	0	0	NA	NA	NA	NA	NA
hsa-miR-4471	0	0	0	0	0	0	0	0	0	0	0	0	0	0	NA	NA	NA	NA	NA
hsa-miR-4472	0	0	0	0	0	0	0	0	0	0	0	0	0	0	NA	NA	NA	NA	NA
hsa-miR-4473	0	0	0	0	0	0	0.221813	0.292332	0.79318	0	0.610012	0.437847	0	0.39253	0.639764	1.73846	0.368006	0.712869	NA
hsa-miR-4474-3p	0	0	0	0	0	0	0.221813	1.75399	1.18977	0.374645	1.52503	0.437847	0	0.917183	-0.285448	1.43593	-0.19879	0.842427	NA
hsa-miR-4474-5p	0	0	0	0	0	0	0	0	0	0	0	0	0	0	NA	NA	NA	NA	NA
hsa-miR-4475	0	0	0	0	0	0	0.221813	0.292332	0	0	0.305006	0	0	0.136525	1.39237	1.89658	0.734146	0.46286	NA
hsa-miR-4476	0	0	0	0	0	0	0	0	0	0	0	0	0	0	NA	NA	NA	NA	NA
hsa-miR-4477a	0	0	0	0	0	0	0	0	0	0	0	0	0	0	NA	NA	NA	NA	NA
hsa-miR-4477b	0	0	0	0	0	0	0	0	0	0	0	0	0	0	NA	NA	NA	NA	NA
hsa-miR-4478	0	0	0	0	0	0	0	0	0	0	0	0	0	0	NA	NA	NA	NA	NA
hsa-miR-4480	0	0	0	0	0	0	0	0	0	0	0	0	0	0	NA	NA	NA	NA	NA
hsa-miR-4481	0	0	0	0	0	0	0	0	0	0	0	0	0	0	NA	NA	NA	NA	NA
hsa-miR-4482-3p	0	0	0	0	0	0	0.221813	0	0	2.62252	0	2.18923	0	0.838927	-0.100562	1.88686	-0.0532957	0.957496	NA
hsa-miR-4482-5p	0	0	0	0	0	0	0	0	0	0	0	0	0	0	NA	NA	NA	NA	NA
hsa-miR-4483	0	0	0	0	0	0	0	0	0	0	0	0	0	0	NA	NA	NA	NA	NA
hsa-miR-4484	0	0	0	0	0	0	0	0.292332	0	0.374645	0	0	0	0.111163	1.57938	1.89801	0.832123	0.405339	NA
hsa-miR-4486	0	0	0	0	0	0	0	0	0	0	0	0	0	0	NA	NA	NA	NA	NA
hsa-miR-4487	0	0	0	0	0	0	0	0.292332	0	0	0.152503	0	0	0.0741392	1.74624	1.89924	0.91944	0.357866	NA
hsa-miR-4489	0	2.89374	0	0	0	0	0	0	0	0	0	0	0.48229	0	2.9868	1.90025	1.57179	0.115999	NA
hsa-miR-4490	0	0	0	0	0	0	0	0	0	0	0	0	0	0	NA	NA	NA	NA	NA
hsa-miR-4491	0	0	0	0	0	0	0	0	0	0	0	0	0	0	NA	NA	NA	NA	NA
hsa-miR-4493	0	0	0	0	0	0	0	0	0	0	0	0	0	0	NA	NA	NA	NA	NA
hsa-miR-4494	0	0	0	0	0	0	0	0	0	0	0	0	0	0	NA	NA	NA	NA	NA
hsa-miR-4495	0	0	0	0	0	0	0	0	0	0	0	0	0	0	NA	NA	NA	NA	NA
hsa-miR-4496	0	0	0	0	0	0	0	0	0	0	0	0	0	0	NA	NA	NA	NA	NA
hsa-miR-4497	0	0	0	0	0	0	0	0	0	0	0.152503	0	0	0.0254172	2.07732	1.90112	1.09268	0.274533	NA
hsa-miR-4498	0	3.61717	0	0	0	0	0.221813	0.584664	1.58636	0.374645	1.22002	0	0.602862	0.664584	0.968398	1.48697	0.651256	0.514882	NA
hsa-miR-4499	0	0	0	0	0	0	0	0	0	0	0	0	0	0	NA	NA	NA	NA	NA
hsa-miR-449a	0	0	0	0	0	0	1.7745	0.584664	1.18977	0.74929	1.06752	0.218923	0	0.930778	-0.310165	1.40283	-0.221098	0.825016	NA
hsa-miR-449b-3p	0	0	0	0	0	0	0	0	0	0	0	0	0	0	NA	NA	NA	NA	NA
hsa-miR-449b-5p	0	0	0	0	0	0	2.66175	1.16933	0	0.374645	0.610012	0	0	0.802623	-0.0862395	1.76433	-0.0488794	0.961015	NA
hsa-miR-449c-3p	0	0	0	0	0	0	0	0	0	0	0	0	0	0	NA	NA	NA	NA	NA
hsa-miR-4500	0	0	0	0	0	0	0	0	0	0	0	0	0	0	NA	NA	NA	NA	NA
hsa-miR-4501	0	0	0	0	0	0	0	0	0	0	0	0	0	0	NA	NA	NA	NA	NA
hsa-miR-4502	0	0	0	0	0	0	0	0	0	0	0	0	0	0	NA	NA	NA	NA	NA
hsa-miR-4503	0	0	0	0	0	0	0	0	0	0	0	0	0	0	NA	NA	NA	NA	NA
hsa-miR-4504	0	0	0	0	0	0	0	0	0	0	0	0	0	0	NA	NA	NA	NA	NA
hsa-miR-4505	0	0	0	0	0	0	0	0	0	0	0	0	0	0	NA	NA	NA	NA	NA
hsa-miR-4506	0	0	0	0	0	0	0	0	0	0	0	0	0	0	NA	NA	NA	NA	NA
hsa-miR-4507	0	0	0	0	0	0	0.221813	0.584664	1.18977	1.12394	2.74505	1.75139	0	1.26944	-0.706834	1.35695	-0.520901	0.602436	NA
hsa-miR-4509	0	0	0	0	0	0	0	0	0	0	0	0	0	0	NA	NA	NA	NA	NA
hsa-miR-450a-1-3p	0	0	0	0	0	0	0.665438	0	0	1.12394	0	0	0	0.298229	0.788564	1.89124	0.416957	0.67671	NA
hsa-miR-450b-3p	0	0	0	0	0	0	0	0	0	0	0	0.218923	0	0.0364872	2.00398	1.90092	1.05422	0.291783	NA
hsa-miR-4511	0	0	0	0	0	0	1.55269	0	0	0	1.06752	0.65677	0	0.546163	0.260072	1.88826	0.137731	0.890453	NA
hsa-miR-4513	0	0	0	0	0	0	0	0	0	0	0.152503	0	0	0.0254172	2.07732	1.90112	1.09268	0.274533	NA
hsa-miR-4514	0	0	0	0	0	0	0	0	0	0	0	0	0	0	NA	NA	NA	NA	NA
hsa-miR-4515	0	0	0	0	0	0	0	0	0	0	0.305006	0	0	0.0508343	1.87324	1.90004	0.985897	0.324184	NA
hsa-miR-4518	0	0	0	0	0	0	0	0	0	0	0	0	0	0	NA	NA	NA	NA	NA
hsa-miR-4519	0	0	0	0	0	0	0	0	0	0	0	0	0	0	NA	NA	NA	NA	NA
hsa-miR-451b	0	0	0	0	0	0	0	0	0	0	0	0	0	0	NA	NA	NA	NA	NA
hsa-miR-452-3p	0	0	0	0	0	0	0	0	0	0	0	0	0	0	NA	NA	NA	NA	NA
hsa-miR-4520-2-3p	0	0	0	0	0	0	0	0	0	0	0	0	0	0	NA	NA	NA	NA	NA
hsa-miR-4520-3p	0	0	0	0	0	0	0	0	0	0	0.305006	0	0	0.0508343	1.87324	1.90004	0.985897	0.324184	NA
hsa-miR-4520-5p	0	0	0	0	0	0	0	0.292332	0	0	0	0	0	0.048722	2.00138	1.90091	1.05286	0.292406	NA
hsa-miR-4522	0	0	0	0	0	0	0	0	0	0	0	0	0	0	NA	NA	NA	NA	NA
hsa-miR-4523	0	3.61717	0	0	0	0	0.221813	0.292332	0	0	0.610012	0	0.602862	0.187359	2.03282	1.77903	1.14266	0.253181	NA
hsa-miR-4524a-3p	0	0	0	0	0	0	0	0	0	0	0	0	0	0	NA	NA	NA	NA	NA
hsa-miR-4524a-5p	0	2.1703	0	0	0	0	0.221813	0	0	0.74929	0.305006	0	0.361717	0.212685	1.6311	1.83387	0.889433	0.373771	NA
hsa-miR-4524b-3p	0	0	0	0	0	0	0	0	0	0	0	0	0	0	NA	NA	NA	NA	NA
hsa-miR-4524b-5p	0	0	0	0	0	0	0	0	0	0	0	0	0	0	NA	NA	NA	NA	NA
hsa-miR-4525	0	0	0	0	0	0	0	0	0	0	0	0	0	0	NA	NA	NA	NA	NA
hsa-miR-4526	0	0	0	0	1.85766	0	0	0.292332	0	0	0.762515	1.75139	0.309609	0.467706	0.816382	1.77869	0.458979	0.646249	NA
hsa-miR-4527	0	0	0	0	0	0	0	0	0	0	0	0	0	0	NA	NA	NA	NA	NA
hsa-miR-4528	0	0	0	0	0	0	0	0	0	0	0	0	0	0	NA	NA	NA	NA	NA
hsa-miR-4529-3p	0	0	0	0	0	0	0	0.292332	0	0.74929	0.152503	0	0	0.199021	1.12365	1.89389	0.593301	0.55298	NA
hsa-miR-4529-5p	0	0	0	0	0	0	0	0	0	0	0	0	0	0	NA	NA	NA	NA	NA
hsa-miR-4530	0	0	0	0	0	0	0	0	0	0	0	0	0	0	NA	NA	NA	NA	NA
hsa-miR-4531	0	0	0	0	0	0	0	0	0	0	0	0	0	0	NA	NA	NA	NA	NA
hsa-miR-4533	0	0	0	0	0	0	0	0	0.79318	0	0	0	0	0.132197	1.5235	1.8976	0.802855	0.422059	NA
hsa-miR-4534	0	0	0	0	0	0	0	0	0	0	0	0	0	0	NA	NA	NA	NA	NA
hsa-miR-4535	0	0	3.87824	0	0	0	0	0	0	0	0	0	0.646373	0	2.64794	1.90096	1.39295	0.163634	NA
hsa-miR-4536-3p	0	0	0	0	0	0	0	0	0	0	0	0.437847	0	0.0729744	1.73937	1.8992	0.91584	0.359751	NA
hsa-miR-4536-5p	0	0	0	0	0	0	0	0.292332	0	0	0	0	0	0.048722	2.00138	1.90091	1.05286	0.292406	NA
hsa-miR-4537	0	0	0	0	0	0	0	0	0	0	0	0	0	0	NA	NA	NA	NA	NA
hsa-miR-4538	0	0	0	0	0	0	0	0	0	0	0	0	0	0	NA	NA	NA	NA	NA
hsa-miR-4539	0	0	0	0	0	0	0	0	0	0	0	0	0	0	NA	NA	NA	NA	NA
hsa-miR-4540	0	0	0	0	0	0	0	0	0	0	0	0	0	0	NA	NA	NA	NA	NA
hsa-miR-4632-3p	0	0	0	0	0	0	0	0	0	0	0	0	0	0	NA	NA	NA	NA	NA
hsa-miR-4632-5p	0	0	0	0	0	0	0	0	0	0	0	0	0	0	NA	NA	NA	NA	NA
hsa-miR-4633-3p	0	0	0	0	0	0	0	0	0	0	0	0	0	0	NA	NA	NA	NA	NA
hsa-miR-4633-5p	0	0	0	0	0	0	0	0	0	0	0	0	0	0	NA	NA	NA	NA	NA
hsa-miR-4634	0	0	3.87824	0	0	0	0	0	0	0	0	0	0.646373	0	2.64794	1.90096	1.39295	0.163634	NA
hsa-miR-4635	0	0	0	0	0	0	0	0	0	0	0	0	0	0	NA	NA	NA	NA	NA
hsa-miR-4637	0	0	0	0	0	0	0	0	0	0	0	0	0	0	NA	NA	NA	NA	NA
hsa-miR-4638-5p	0	0	0	0	0	0	0.443625	0	1.18977	1.49858	0.610012	0	0	0.623664	0.176476	1.79631	0.0982434	0.921739	NA
hsa-miR-4639-3p	0	0	0	0	0	0	0	0	0	0	0	0	0	0	NA	NA	NA	NA	NA
hsa-miR-4639-5p	0	0	0	0	0	0	0	0	0	0	0	0	0	0	NA	NA	NA	NA	NA
hsa-miR-4640-3p	0	0	0	0	0	0	0	2.92332	0.79318	0.374645	1.67753	0.65677	0	1.07091	-0.434888	1.56319	-0.278205	0.780855	NA
hsa-miR-4640-5p	0	0.723435	0	0	0	0	0	0	0.39659	0	0	0	0.120572	0.0660983	2.20263	1.89995	1.15931	0.24633	NA
hsa-miR-4641	0	0	0	0	0	0	0	0	0	0	0	0	0	0	NA	NA	NA	NA	NA
hsa-miR-4642	0	0	0	0	0	0	0	0.876996	0.79318	0	0.152503	1.31354	0	0.522703	0.329199	1.83204	0.17969	0.857396	NA
hsa-miR-4643	0	0	0	0	0	0	0	0	0	0	0	0	0	0	NA	NA	NA	NA	NA
hsa-miR-4644	0	1.44687	0	0	0	0	0.221813	0	0	0	0.305006	0.218923	0.241145	0.12429	1.83897	1.88206	0.977107	0.328516	NA
hsa-miR-4645-5p	0	0	0	0	0	0	0	0	0	0	0	0	0	0	NA	NA	NA	NA	NA
hsa-miR-4646-3p	0	0	0	0	0	0	0	0	0	0	0	0	0	0	NA	NA	NA	NA	NA
hsa-miR-4648	0	0	0	0	0	0	0.887251	0	0.39659	0.374645	0.457509	0.218923	0	0.389153	0.641836	1.74805	0.367173	0.71349	NA
hsa-miR-4650-3p	0	0	0	0	0	0	0	0	0	0	0	0	0	0	NA	NA	NA	NA	NA
hsa-miR-4650-5p	0	0	0	0	0	0	0	0	0	0	0	0	0	0	NA	NA	NA	NA	NA
hsa-miR-4651	0	0	0	0	0	0	0.221813	0	0.39659	0.374645	0.152503	0.65677	0	0.300387	0.867886	1.80255	0.481477	0.630178	NA
hsa-miR-4652-3p	0	0	0	0	0	0	0	0	0	0	0	0	0	0	NA	NA	NA	NA	NA
hsa-miR-4652-5p	0	0	0	0	0	0	0	0	0	0	0	0	0	0	NA	NA	NA	NA	NA
hsa-miR-4653-3p	0	0	0	0	0	0	0	0	0	0	0.305006	0	0	0.0508343	1.87324	1.90004	0.985897	0.324184	NA
hsa-miR-4653-5p	0	0	0	0	0	0	0.665438	0	0	0	0	0.875693	0	0.256855	0.893241	1.89199	0.472117	0.636843	NA
hsa-miR-4654	0	0	0	0	0	0	0.221813	0.292332	3.9659	2.24787	0.610012	0.218923	0	1.25947	-0.63065	1.46216	-0.431313	0.666241	NA
hsa-miR-4655-3p	0	0	0	0	0	0	0	0	0	0	0	0	0	0	NA	NA	NA	NA	NA
hsa-miR-4655-5p	0	0	0	0	0	0	0.221813	0.292332	0	0	0	0.218923	0	0.122178	1.4708	1.89723	0.775233	0.438202	NA
hsa-miR-4656	0	0	0	0	0	0	0	0	0	0	0	0	0	0	NA	NA	NA	NA	NA
hsa-miR-4657	0	3.61717	0	0	1.85766	0	0	0.584664	0	0	0.305006	0.875693	0.912472	0.294227	2.06372	1.56477	1.31887	0.187213	NA
hsa-miR-4658	0	0	0	0	0	0	0.221813	0	1.58636	0.74929	0.762515	0.875693	0	0.699278	0.0589511	1.62437	0.0362916	0.97105	NA
hsa-miR-4659a-3p	0	0	0	0	0	0	0	0	0	0.374645	0.152503	0.218923	0	0.124345	1.47373	1.89725	0.776772	0.437293	NA
hsa-miR-4659a-5p	0	0	0	0	0	0	0	0	0	0	0	0	0	0	NA	NA	NA	NA	NA
hsa-miR-4659b-3p	0	0	0	0	0	0	0	0	0	0	0	0	0	0	NA	NA	NA	NA	NA
hsa-miR-4659b-5p	0	0	0	0	0	0	0	0	0	0	0	0	0	0	NA	NA	NA	NA	NA
hsa-miR-466	0	0	0	0	0	0	0	0	0	0	0	0	0	0	NA	NA	NA	NA	NA
hsa-miR-4661-3p	0	0	0	0	0	0	0	0	0	0	0	0	0	0	NA	NA	NA	NA	NA
hsa-miR-4662a-3p	0	0	0	0	0	0	0	0	0	0	0	0	0	0	NA	NA	NA	NA	NA
hsa-miR-4662b	0	0	0	0	0	0	0	0	0	0	0	0	0	0	NA	NA	NA	NA	NA
hsa-miR-4663	0	0	0	0	0	0	0	0	0	0	0	0	0	0	NA	NA	NA	NA	NA
hsa-miR-4664-5p	0	0	0	0	0	0	0	0	0	0	0	0	0	0	NA	NA	NA	NA	NA
hsa-miR-4665-3p	0	0	0	0	0	0	0	0	0	0	0	0	0	0	NA	NA	NA	NA	NA
hsa-miR-4665-5p	0	0	0	0	0	0	0.443625	1.46166	3.17272	1.12394	1.06752	0.875693	0	1.35753	-0.786062	1.30037	-0.604489	0.545519	NA
hsa-miR-4666a-3p	0	0	0	0	0	0	0	0	0	0	0	0	0	0	NA	NA	NA	NA	NA
hsa-miR-4666a-5p	0	0	0	0	0	0	0	0	0	0	0	0.437847	0	0.0729744	1.73937	1.8992	0.91584	0.359751	NA
hsa-miR-4666b	0	0	0	0	0	0	0	0	0	0	0	0	0	0	NA	NA	NA	NA	NA
hsa-miR-4667-3p	0	0	0	0	0	0	0	0	0	0	0	0	0	0	NA	NA	NA	NA	NA
hsa-miR-4668-3p	0	0	0	0	0	0	0	0	0	0	0	0	0	0	NA	NA	NA	NA	NA
hsa-miR-4669	0	0	0	0	0	0	0	0	0	0	0	0	0	0	NA	NA	NA	NA	NA
hsa-miR-4670-3p	0	0	0	0	0	0	0	0	0	0.74929	0	0	0	0.124882	1.5235	1.8976	0.802855	0.422059	NA
hsa-miR-4670-5p	0	0	0	0	0	0	0	0	0	0	0	0	0	0	NA	NA	NA	NA	NA
hsa-miR-4671-3p	0	2.89374	0	0	0	0	0	0.292332	0	0	0	0	0.48229	0.048722	2.56276	1.89845	1.34992	0.177041	NA
hsa-miR-4671-5p	0	0.723435	0	0	0	0	0	0.292332	0.39659	0	0	0.218923	0.120572	0.151308	1.53252	1.8951	0.808678	0.4187	NA
hsa-miR-4672	0	0	0	0	0	0	0	0	0	0	0.610012	0	0	0.101669	1.55146	1.89781	0.817503	0.413641	NA
hsa-miR-4673	0	1.44687	0	0	0	0	0	0.292332	0	0	0	0	0.241145	0.048722	2.34935	1.8993	1.23695	0.216104	NA
hsa-miR-4674	0	0	0	0	0	0	0	0	0.79318	0.374645	0.152503	0.218923	0	0.256542	0.918556	1.89218	0.485448	0.627359	NA
hsa-miR-4675	0	0	0	0	0	0	0	0	0	0	0	0	0	0	NA	NA	NA	NA	NA
hsa-miR-4676-5p	0	0	0	0	0	0	0	0.292332	0.39659	0.74929	0.457509	0	0	0.315953	0.73921	1.8909	0.39093	0.695849	NA
hsa-miR-4677-5p	0	1.44687	0	0	0	0	0.443625	0	0	0.374645	0	0	0.241145	0.136378	1.75133	1.89512	0.924126	0.355421	NA
hsa-miR-4678	0	0	0	0	0	0	0	0	0	0	0	0	0	0	NA	NA	NA	NA	NA
hsa-miR-4679	0	0	0	0	0	0	0	0	0	0	0	0	0	0	NA	NA	NA	NA	NA
hsa-miR-4680-3p	0	0	0	0	0	0	0	0	0	0	0	0	0	0	NA	NA	NA	NA	NA
hsa-miR-4680-5p	0	0	0	0	0	0	0	0	0	0	0	0	0	0	NA	NA	NA	NA	NA
hsa-miR-4681	0	0	0	0	0	0	0	0	0	0	0	0	0	0	NA	NA	NA	NA	NA
hsa-miR-4683	0	0	0	0	0	0	0.221813	0	0	0	0	0	0	0.0369688	2.00138	1.90091	1.05286	0.292406	NA
hsa-miR-4684-3p	0	0	0	0	0	0	0	0	0	0	0	0	0	0	NA	NA	NA	NA	NA
hsa-miR-4684-5p	0	0	0	0	0	0	0	0	0	0	0	0	0	0	NA	NA	NA	NA	NA
hsa-miR-4685-3p	0	1.44687	0	0	0	0	0.665438	0	0	1.49858	0.305006	0.875693	0.241145	0.557453	0.686196	1.6362	0.419384	0.674936	NA
hsa-miR-4685-5p	0	0	0	0	0	0	0	0	0	0.374645	0.305006	0	0	0.113275	1.54199	1.89774	0.812543	0.41648	NA
hsa-miR-4686	0	0	0	0	0	0	0	0	0	0	0	0	0	0	NA	NA	NA	NA	NA
hsa-miR-4687-5p	0	2.89374	0	0	0	0	0.221813	0.292332	0.79318	0.374645	1.67753	0.437847	0.48229	0.632891	0.917603	1.39087	0.659732	0.509426	NA
hsa-miR-4689	0	0	0	0	0	0	0	0	0.79318	0.74929	0.305006	0	0	0.307913	0.767082	1.89109	0.40563	0.685015	NA
hsa-miR-4690-3p	0	0	0	0	0	0	0.887251	0	0	0	0.305006	0	0	0.198709	1.09616	1.89365	0.578864	0.562681	NA
hsa-miR-4690-5p	0	0	0	0	0	0	0.221813	0.584664	0.39659	1.87323	0.762515	0.65677	0	0.749263	-0.0310465	1.46815	-0.0211466	0.983129	NA
hsa-miR-4691-3p	0	0	0	0	0	0	0	0	0.39659	0	0.305006	0	0	0.116933	1.54199	1.89774	0.812543	0.41648	NA
hsa-miR-4691-5p	0	0	0	0	0	0	0	0	0	0	0	0	0	0	NA	NA	NA	NA	NA
hsa-miR-4692	0	0	0	0	0	0	0	0	0	0	0	0	0	0	NA	NA	NA	NA	NA
hsa-miR-4693-3p	0	0	0	0	0	0	0	0	0	0	0	0	0	0	NA	NA	NA	NA	NA
hsa-miR-4693-5p	0	0	0	0	0	0	0	0	0	0	0	0	0	0	NA	NA	NA	NA	NA
hsa-miR-4694-3p	0	0	0	0	0	0	0	0	0	0	0	0	0	0	NA	NA	NA	NA	NA
hsa-miR-4694-5p	0	0	0	0	0	0	0	0	0	0	0	0	0	0	NA	NA	NA	NA	NA
hsa-miR-4695-3p	0	0	0	0	0	0	0	0	0	0	0	0	0	0	NA	NA	NA	NA	NA
hsa-miR-4695-5p	0	0	0	0	0	0	0	0	0	0	0	0	0	0	NA	NA	NA	NA	NA
hsa-miR-4696	0	0	0	0	0	0	0.221813	0	0	0	0	0	0	0.0369688	2.00138	1.90091	1.05286	0.292406	NA
hsa-miR-4697-3p	0	0	0	0	0	0	0	0	0	0	0	0	0	0	NA	NA	NA	NA	NA
hsa-miR-4697-5p	0	0	0	0	0	0	0	0	0	0	0	0	0	0	NA	NA	NA	NA	NA
hsa-miR-4698	0	0	0	0	0	0	0	0	0	0.374645	0	0	0	0.0624408	2.00138	1.90091	1.05286	0.292406	NA
hsa-miR-4699-3p	0	0	0	0	0	0	0	0	0	0	0	0	0	0	NA	NA	NA	NA	NA
hsa-miR-4699-5p	0	0	0	0	0	0	0	0	0	0	0	0	0	0	NA	NA	NA	NA	NA
hsa-miR-4700-3p	0	0	0	0	0	0	0.221813	0	0	0	0	0	0	0.0369688	2.00138	1.90091	1.05286	0.292406	NA
hsa-miR-4700-5p	0	0	0	0	0	0	0	0	0	0	0	0	0	0	NA	NA	NA	NA	NA
hsa-miR-4701-3p	0	0	0	0	0	0	0	0	0	0	0	0	0	0	NA	NA	NA	NA	NA
hsa-miR-4701-5p	0	0	0	0	0	0	0	0.292332	0.39659	0	0	0.218923	0	0.151308	1.34143	1.89603	0.707495	0.479259	NA
hsa-miR-4703-3p	0	0	0	0	0	0	0	0	0	0	0	0	0	0	NA	NA	NA	NA	NA
hsa-miR-4703-5p	0	0	0	0	0	0	0	0	0	0	0	0	0	0	NA	NA	NA	NA	NA
hsa-miR-4704-3p	0	0	0	0	0	0	0	0	0	0	0	0	0	0	NA	NA	NA	NA	NA
hsa-miR-4704-5p	0	0	0	0	0	0	0.443625	0	0	0	0	0	0	0.0739375	1.7342	1.89917	0.913135	0.361172	NA
hsa-miR-4705	0	0	0	0	0	0	0	0	0	0	0	0	0	0	NA	NA	NA	NA	NA
hsa-miR-4706	0	0	0	0	0	0	0.443625	0	0	0.374645	0.305006	1.09462	0	0.369649	0.609795	1.87376	0.325439	0.744849	NA
hsa-miR-4707-5p	0	0.723435	0	0	0	0	0	0.292332	0	0	0	0	0.120572	0.048722	2.20263	1.89995	1.15931	0.24633	NA
hsa-miR-4708-3p	0	0	0	0	0	0	0	0	1.58636	0	0	0.218923	0	0.30088	0.791764	1.89126	0.418644	0.675476	NA
hsa-miR-4708-5p	0	0	0	0	0	0	0	0	0	0	0	0	0	0	NA	NA	NA	NA	NA
hsa-miR-4709-3p	0	0	0	0	0	0	0.443625	1.16933	0.39659	1.12394	0.762515	0.875693	0	0.795281	-0.117922	1.4096	-0.0836566	0.933329	NA
hsa-miR-4710	0	0	0	0	0	0	0	0	0.79318	0	0	0	0	0.132197	1.5235	1.8976	0.802855	0.422059	NA
hsa-miR-4711-3p	0	0	0	0	0	0	0	0.292332	0	0	0	0	0	0.048722	2.00138	1.90091	1.05286	0.292406	NA
hsa-miR-4711-5p	0	0	0	0	0	0	0.443625	0.292332	0	0	0	0.218923	0	0.159147	1.28084	1.8954	0.675761	0.499192	NA
hsa-miR-4712-3p	0	0	0	0	0	0	0.221813	0.584664	0.79318	0.374645	0.915018	0.218923	0	0.51804	0.38741	1.55273	0.249503	0.802972	NA
hsa-miR-4712-5p	0	0	0	0	0	0	0	0	0	0	0	0	0	0	NA	NA	NA	NA	NA
hsa-miR-4713-3p	0	0	0	0	0	0	0	0	0	0	0	0	0	0	NA	NA	NA	NA	NA
hsa-miR-4713-5p	0	0	0	0	0	0	0	0	0	0	0	0	0	0	NA	NA	NA	NA	NA
hsa-miR-4714-5p	0	2.1703	0	0	0	0	0.221813	0	0	0	0.152503	0	0.361717	0.0623859	2.31334	1.89795	1.21886	0.222897	NA
hsa-miR-4715-3p	0	0	0	0	0	0	0	0	0.39659	0	0	0	0	0.0660983	2.00138	1.90091	1.05286	0.292406	NA
hsa-miR-4715-5p	0	0	0	0	0	0	0	0	0.79318	0.74929	0.152503	0.65677	0	0.391957	0.574442	1.87286	0.306718	0.759058	NA
hsa-miR-4716-3p	0	0	0	0	0	0	0	0	0	0	0.152503	0	0	0.0254172	2.07732	1.90112	1.09268	0.274533	NA
hsa-miR-4716-5p	0	0	0	0	0	0	0	0	0	0	0	0	0	0	NA	NA	NA	NA	NA
hsa-miR-4717-5p	0	0	0	0	0	0	0	0	0	0	0	0	0	0	NA	NA	NA	NA	NA
hsa-miR-4718	0	0	0	0	0	0	0	0	0	0	0	0	0	0	NA	NA	NA	NA	NA
hsa-miR-4719	0	0	0	0	0	0	0	0	0	0	0	0	0	0	NA	NA	NA	NA	NA
hsa-miR-4720-3p	0	0	0	0	0	0	0	0	0	0	0	0	0	0	NA	NA	NA	NA	NA
hsa-miR-4720-5p	0	0	0	0	0	0	0	0	0	0	0	0	0	0	NA	NA	NA	NA	NA
hsa-miR-4722-3p	0	0	0	0	0	0	0	0	0	0	0	0	0	0	NA	NA	NA	NA	NA
hsa-miR-4722-5p	0	0	0	0	0	0	0	0	0.39659	0.374645	0.305006	0	0	0.179373	1.20549	1.89466	0.636257	0.524609	NA
hsa-miR-4723-3p	0	0	0	0	0	0	0	0	0	0	0.610012	0	0	0.101669	1.55146	1.89781	0.817503	0.413641	NA
hsa-miR-4723-5p	0	0	0	0	0	0	0.665438	0.292332	0	0	0.610012	0.875693	0	0.407246	0.534946	1.85336	0.288635	0.772861	NA
hsa-miR-4724-3p	0	0	0	0	0	0	0	0	0	0	0	0	0	0	NA	NA	NA	NA	NA
hsa-miR-4724-5p	0	0	0	0	0	0	0	0	0	0	0	0	0	0	NA	NA	NA	NA	NA
hsa-miR-4726-3p	0	0	0	0	0	0	0	0	0	0.374645	0.152503	0	0	0.087858	1.74624	1.89924	0.91944	0.357866	NA
hsa-miR-4726-5p	0	0	0	0	0	0	1.33088	0.584664	0.39659	0.374645	0.915018	0.437847	0	0.673273	0.0731776	1.47273	0.0496884	0.960371	NA
hsa-miR-4727-5p	0	0	0	0	0	0	0	0	0	0	0.305006	0	0	0.0508343	1.87324	1.90004	0.985897	0.324184	NA
hsa-miR-4728-5p	0	0	0	0	0	0	0	0	0	0	0	0	0	0	NA	NA	NA	NA	NA
hsa-miR-4729	0	0	0	0	0	0	0	0	0	0	0	0	0	0	NA	NA	NA	NA	NA
hsa-miR-4730	0	0	0	0	0	0	0	0	0	0	0.305006	0.218923	0	0.0873215	1.64056	1.89848	0.864142	0.38751	NA
hsa-miR-4731-3p	0	0	0	0	0	0	0	0	0.79318	0	0.915018	1.75139	0	0.576597	0.21866	1.88808	0.115811	0.907802	NA
hsa-miR-4731-5p	0	0	0	0	0	0	0	1.16933	0.39659	0	0	0	0	0.260986	0.899913	1.89204	0.475631	0.634338	NA
hsa-miR-4732-3p	0	0	0	0	0	0	0	0	0	0	0	0	0	0	NA	NA	NA	NA	NA
hsa-miR-4732-5p	0	0	0	0	0	0	0	0	0	0	0	0	0	0	NA	NA	NA	NA	NA
hsa-miR-4733-3p	0	0	0	0	0	0	0	0	0.79318	0	0	0	0	0.132197	1.5235	1.8976	0.802855	0.422059	NA
hsa-miR-4733-5p	0	0	0	0	0	0	0	0	0	0	0.762515	0	0	0.127086	1.4221	1.89684	0.749721	0.453423	NA
hsa-miR-4735-3p	0	0	0	0	0	0	0	0	0	0	0	0	0	0	NA	NA	NA	NA	NA
hsa-miR-4735-5p	0	0	0	0	0	0	0	0	0	0	0	0	0	0	NA	NA	NA	NA	NA
hsa-miR-4736	0	0	0	0	0	0	0	0	0	0	0	0	0	0	NA	NA	NA	NA	NA
hsa-miR-4737	0	0	0	0	0	0	0	0	0	0	0	0	0	0	NA	NA	NA	NA	NA
hsa-miR-4738-3p	0	0	0	0	0	0	1.10906	0	1.98295	0	0.305006	1.09462	0	0.748606	-0.00877632	1.76154	-0.0049822	0.996025	NA
hsa-miR-4738-5p	0	0	0	0	0	0	0	0	0	0	0	0	0	0	NA	NA	NA	NA	NA
hsa-miR-4739	0	0	0	0	0	0	0	0	0	0	0	0	0	0	NA	NA	NA	NA	NA
hsa-miR-4740-3p	0	0	0	0	0	0	0	0	0	0	0	0	0	0	NA	NA	NA	NA	NA
hsa-miR-4740-5p	0	1.44687	0	0	0	0	0	0.584664	0	0	0	1.31354	0.241145	0.316367	1.0393	1.88986	0.549936	0.582363	NA
hsa-miR-4742-5p	0	0	0	0	0	0	0.221813	2.33866	0.79318	2.24787	0.152503	0.437847	0	1.03198	-0.401178	1.46482	-0.273876	0.78418	NA
hsa-miR-4743-3p	0	0	0	0	0	0	0	0.292332	0	0	0.152503	0	0	0.0741392	1.74624	1.89924	0.91944	0.357866	NA
hsa-miR-4744	0	0	0	0	0	0	0	0	0	0	0	0	0	0	NA	NA	NA	NA	NA
hsa-miR-4746-3p	0	0	0	0	0	0	0	0	0	0	0	0	0	0	NA	NA	NA	NA	NA
hsa-miR-4747-3p	0	0	0	0	0	0	0	0.292332	0	0	0.152503	0	0	0.0741392	1.74624	1.89924	0.91944	0.357866	NA
hsa-miR-4747-5p	0	0.723435	0	0	0	0	0	0.292332	0	0	0	0	0.120572	0.048722	2.20263	1.89995	1.15931	0.24633	NA
hsa-miR-4749-3p	0	0	0	0	0	0	0	0	0	0	0	0	0	0	NA	NA	NA	NA	NA
hsa-miR-4749-5p	0	0	0	0	0	0	0.665438	0	0.79318	0	0.457509	0.437847	0	0.392329	0.574179	1.85905	0.308856	0.757431	NA
hsa-miR-4750-3p	0	0	0	0	0	0	0.221813	0	0.39659	0	0	0	0	0.103067	1.6592	1.89862	0.873895	0.382176	NA
hsa-miR-4750-5p	0	0	0	0	0	0	0	0	0	0.74929	0	0	0	0.124882	1.5235	1.8976	0.802855	0.422059	NA
hsa-miR-4751	0	0	0	0	0	0	0	0	0.39659	0	0	1.09462	0	0.248534	0.929223	1.89226	0.491064	0.623381	NA
hsa-miR-4752	0	0	0	0	0	0	0	0	0	0	0	0	0	0	NA	NA	NA	NA	NA
hsa-miR-4753-3p	0	0	0	0	0	0	0	0	0	0	0	0	0	0	NA	NA	NA	NA	NA
hsa-miR-4754	0	0	0	0	0	0	0.221813	0	0.39659	0.374645	0.152503	0.218923	0	0.227412	1.08141	1.84858	0.584994	0.558552	NA
hsa-miR-4755-5p	0	0	0	0	0	0	0.443625	0.292332	0	0	0.152503	0.218923	0	0.184564	1.16101	1.89423	0.612915	0.539932	NA
hsa-miR-4756-3p	0	0	0	0	0	0	0	0	0	0	0	0	0	0	NA	NA	NA	NA	NA
hsa-miR-4756-5p	0	0	0	0	0	0	0	0	0	0	0	0	0	0	NA	NA	NA	NA	NA
hsa-miR-4757-3p	0	0	0	0	0	0	0.443625	0.584664	0.79318	0.374645	1.52503	0.218923	0	0.656678	0.107284	1.49984	0.07153	0.942976	NA
hsa-miR-4757-5p	0	1.44687	0	0	0	0	0.221813	0.584664	1.18977	0	0.610012	3.28385	0.241145	0.981685	0.0626273	1.46499	0.0427493	0.965901	NA
hsa-miR-4758-3p	0	0	0	0	0	0	0	0	0.79318	0	0.305006	0.437847	0	0.256005	0.911077	1.89213	0.48151	0.630154	NA
hsa-miR-4758-5p	0	0	0	0	0	0	0	0	0	0	0	0	0	0	NA	NA	NA	NA	NA
hsa-miR-4759	0	0	0	0	0	7.90883	0	0	0	0	0	0	1.31814	0	2.64794	1.90096	1.39295	0.163634	NA
hsa-miR-4760-3p	0	0	0	0	0	0	0	0	0	0	0	0	0	0	NA	NA	NA	NA	NA
hsa-miR-4760-5p	0	0	0	0	0	0	0	0	0	0	0	0	0	0	NA	NA	NA	NA	NA
hsa-miR-4761-5p	0	0	0	0	0	0	0	0.292332	0	0	0	0	0	0.048722	2.00138	1.90091	1.05286	0.292406	NA
hsa-miR-4762-3p	0	0	0	0	0	0	0	0	0	0	0	0	0	0	NA	NA	NA	NA	NA
hsa-miR-4764-3p	0	0	0	0	0	0	0	0	0	0	0	0	0	0	NA	NA	NA	NA	NA
hsa-miR-4764-5p	0	0	0	0	0	0	0	0	0	0	0	0	0	0	NA	NA	NA	NA	NA
hsa-miR-4765	0	0	0	0	0	0	0	0	0	0	0	0	0	0	NA	NA	NA	NA	NA
hsa-miR-4766-3p	0	0	0	0	3.71531	0	0.443625	0	0	1.12394	0	0	0.619219	0.26126	1.53391	1.87615	0.81758	0.413597	NA
hsa-miR-4766-5p	0	0	0	0	0	0	0	0	0	0	0	0	0	0	NA	NA	NA	NA	NA
hsa-miR-4768-3p	0	0	0	0	0	0	0	0	0	0	0	0	0	0	NA	NA	NA	NA	NA
hsa-miR-4770	0	0	0	0	0	0	0.221813	0	0.39659	0	0	0	0	0.103067	1.6592	1.89862	0.873895	0.382176	NA
hsa-miR-4771	0	0	0	0	0	0	0	0	0	0	0	0	0	0	NA	NA	NA	NA	NA
hsa-miR-4772-3p	0	0	0	0	0	0	0	0	0	0	0	0	0	0	NA	NA	NA	NA	NA
hsa-miR-4772-5p	0	0	0	0	0	0	0	0	0	0	0	0	0	0	NA	NA	NA	NA	NA
hsa-miR-4774-3p	0	0	0	0	0	0	0	0	0	0	0	0	0	0	NA	NA	NA	NA	NA
hsa-miR-4774-5p	0	0	0	0	0	0	0	0	0	0	0	0	0	0	NA	NA	NA	NA	NA
hsa-miR-4776-3p	0	0	0	0	0	0	0	0	0	0	0	0	0	0	NA	NA	NA	NA	NA
hsa-miR-4776-5p	0	0	0	0	0	0	0	0	0	0	0	0	0	0	NA	NA	NA	NA	NA
hsa-miR-4777-3p	0	0	0	0	0	0	0	0	0	0	0	0	0	0	NA	NA	NA	NA	NA
hsa-miR-4777-5p	0	0	0	0	0	0	0	0	0	0	0	0	0	0	NA	NA	NA	NA	NA
hsa-miR-4778-3p	0	0	0	0	0	0	0	0	0	0	0	0	0	0	NA	NA	NA	NA	NA
hsa-miR-4778-5p	0	0	0	0	0	0	0	0	0	0	0	0	0	0	NA	NA	NA	NA	NA
hsa-miR-4779	0	0	0	0	0	0	0	0	0	0	0	0	0	0	NA	NA	NA	NA	NA
hsa-miR-4780	0	0	0	0	0	0	0	0	0	0	0	0	0	0	NA	NA	NA	NA	NA
hsa-miR-4781-5p	0	0	0	0	0	0	0	0	0	0	0	0	0	0	NA	NA	NA	NA	NA
hsa-miR-4782-3p	0	0	0	0	0	0	0	0	0	0	0	0	0	0	NA	NA	NA	NA	NA
hsa-miR-4782-5p	0	0	0	0	0	0	0	0	0	0	0	0	0	0	NA	NA	NA	NA	NA
hsa-miR-4783-3p	0	0	0	0	0	0	0	0	0	0	0.305006	0.437847	0	0.123809	1.44941	1.89709	0.76402	0.444855	NA
hsa-miR-4783-5p	0	0	0	0	0	0	0	0	0	0	0	0	0	0	NA	NA	NA	NA	NA
hsa-miR-4784	0	0	0	0	0	0	0	0	0	0	0	0	0	0	NA	NA	NA	NA	NA
hsa-miR-4786-3p	0	0	0	0	0	0	0.443625	0	0.39659	0	0	0	0	0.140036	1.39869	1.89664	0.737459	0.460844	NA
hsa-miR-4788	0	1.44687	0	0	0	0	0.443625	1.16933	0.39659	0	0.915018	0.875693	0.241145	0.633376	0.57757	1.46407	0.394495	0.693215	NA
hsa-miR-4789-3p	0	0	0	0	0	0	0	0	0	0	0	0	0	0	NA	NA	NA	NA	NA
hsa-miR-4789-5p	0	0	0	0	0	0	0	0	0	0	0	0	0	0	NA	NA	NA	NA	NA
hsa-miR-4790-3p	0	0	0	0	0	0	0	0	0	0	0	0	0	0	NA	NA	NA	NA	NA
hsa-miR-4790-5p	0	0	0	0	0	0	0	0	0	0	0	0	0	0	NA	NA	NA	NA	NA
hsa-miR-4791	0	0	0	0	0	0	0	0	0	0	0	0	0	0	NA	NA	NA	NA	NA
hsa-miR-4793-3p	0	0	0	0	0	0	0	0	0.39659	0	0.305006	0	0	0.116933	1.54199	1.89774	0.812543	0.41648	NA
hsa-miR-4793-5p	0	0	0	0	0	0	0	0	0	0	0	0	0	0	NA	NA	NA	NA	NA
hsa-miR-4794	0	0	0	0	0	0	0	0	0	0	0	0	0	0	NA	NA	NA	NA	NA
hsa-miR-4795-3p	0	0	0	0	0	0	0	0	0	0	0	0.437847	0	0.0729744	1.73937	1.8992	0.91584	0.359751	NA
hsa-miR-4795-5p	0	0	0	0	0	0	0	0	0	0	0	0	0	0	NA	NA	NA	NA	NA
hsa-miR-4796-3p	0	0	0	4.95023	0	0	0.887251	0	0	0	0	0	0.825038	0.147875	1.96826	1.89289	1.03982	0.298423	NA
hsa-miR-4796-5p	0	0	0	0	0	0	0	0	0	0	0	0	0	0	NA	NA	NA	NA	NA
hsa-miR-4797-3p	0	2.89374	0	0	0	0	0.221813	1.16933	0.39659	0.74929	0.305006	0.437847	0.48229	0.546646	1.13315	1.38195	0.81996	0.412239	NA
hsa-miR-4797-5p	0	0	0	0	0	0	0	0.292332	0	0	0	0	0	0.048722	2.00138	1.90091	1.05286	0.292406	NA
hsa-miR-4798-3p	0	0	0	0	0	0	0	0	0	0	0	0	0	0	NA	NA	NA	NA	NA
hsa-miR-4798-5p	0	0	0	0	0	0	0	0	0	0	0	0	0	0	NA	NA	NA	NA	NA
hsa-miR-4799-3p	0	0	0	0	0	0	0	0	0	0	0	0	0	0	NA	NA	NA	NA	NA
hsa-miR-4799-5p	0	0	0	0	0	0	0	0.292332	0	0	0.152503	0	0	0.0741392	1.74624	1.89924	0.91944	0.357866	NA
hsa-miR-4800-5p	0	0	0	0	0	0	0	0	0	0.374645	0	0	0	0.0624408	2.00138	1.90091	1.05286	0.292406	NA
hsa-miR-4801	0	0	0	0	0	0	0	0	0	0	0	0	0	0	NA	NA	NA	NA	NA
hsa-miR-4802-3p	0	0	0	0	0	0	0.443625	0.584664	0	0	0.305006	0	0	0.222216	1.01406	1.89294	0.535705	0.592163	NA
hsa-miR-4802-5p	0	0	0	0	0	0	0	0	0	0	0	0	0	0	NA	NA	NA	NA	NA
hsa-miR-4803	0	0	0	0	0	0	0.665438	0	0	0	0	0	0	0.110906	1.52002	1.89758	0.801032	0.423113	NA
hsa-miR-4804-3p	0	0	0	0	0	0	0.221813	0	0	0	0	0	0	0.0369688	2.00138	1.90091	1.05286	0.292406	NA
hsa-miR-488-3p	0	0	0	0	0	0	0	0	0	0	0	0	0	0	NA	NA	NA	NA	NA
hsa-miR-488-5p	0	0	0	0	0	0	0	0	0	0	0	0	0	0	NA	NA	NA	NA	NA
hsa-miR-489-3p	0	0	0	4.95023	0	0	0	0	0	0.74929	0	0	0.825038	0.124882	2.12088	1.89457	1.11945	0.262947	NA
hsa-miR-489-5p	0	0	0	0	0	0	0	0	0	0	0	0	0	0	NA	NA	NA	NA	NA
hsa-miR-491-3p	0	0	0	0	0	0	0	0.292332	0	0	0	0	0	0.048722	2.00138	1.90091	1.05286	0.292406	NA
hsa-miR-492	0	0	0	0	0	0	0	0	0	0	0	0	0	0	NA	NA	NA	NA	NA
hsa-miR-495-5p	0	0	0	0	0	0	1.10906	0.876996	0.39659	0.374645	0.915018	2.18923	0	0.976924	-0.382552	1.39401	-0.274425	0.783758	NA
hsa-miR-497-3p	0	0	0	0	0	0	0	0	0	0	0	0	0	0	NA	NA	NA	NA	NA
hsa-miR-498-3p	0	0	0	0	0	0	0	0	0	0	0	0	0	0	NA	NA	NA	NA	NA
hsa-miR-498-5p	0	0	0	0	0	0	0	0	0	0	0	0	0	0	NA	NA	NA	NA	NA
hsa-miR-4999-3p	0	0	0	0	0	0	0	0.292332	0	0	0	0	0	0.048722	2.00138	1.90091	1.05286	0.292406	NA
hsa-miR-4999-5p	0	1.44687	0	0	1.85766	0	1.10906	0.584664	0.79318	0.374645	0.305006	1.53246	0.550754	0.78317	0.714915	1.19132	0.600105	0.548436	NA
hsa-miR-499a-3p	0	0	0	0	0	0	0	0	0	0	0	0	0	0	NA	NA	NA	NA	NA
hsa-miR-499a-5p	0	0	0	0	0	0	0	0.292332	0.79318	0	0.152503	0.65677	0	0.315797	0.737259	1.89089	0.389901	0.69661	NA
hsa-miR-499b-3p	0	0	0	0	0	0	0	0	0	0	0	0	0	0	NA	NA	NA	NA	NA
hsa-miR-499b-5p	0	0	0	0	0	0	0	0	0	0	0	0	0	0	NA	NA	NA	NA	NA
hsa-miR-5000-5p	0	0	0	7.42535	0	0	0	0	0	0	0	0	1.23756	0	3.31293	1.89942	1.74418	0.0811278	NA
hsa-miR-5002-3p	0	0	0	0	0	0	0	0	0	0	0	0	0	0	NA	NA	NA	NA	NA
hsa-miR-5003-3p	0	0	0	0	0	0	1.33088	0.292332	0	0	0.457509	0	0	0.346786	0.645243	1.8903	0.341344	0.732844	NA
hsa-miR-5003-5p	0	0	0	0	0	0	0	0	0	1.49858	0	0	0	0.249763	0.948007	1.89241	0.500952	0.616405	NA
hsa-miR-5004-3p	0	0	0	0	0	0	0	0	0	0	0	0	0	0	NA	NA	NA	NA	NA
hsa-miR-5004-5p	0	0	0	0	0	0	0	0.876996	0	0.74929	0	0.65677	0	0.380509	0.580402	1.88991	0.307106	0.758763	NA
hsa-miR-5006-3p	0	0	0	0	0	0	0	0	0.39659	0	0	0	0	0.0660983	2.00138	1.90091	1.05286	0.292406	NA
hsa-miR-5006-5p	0	0	0	0	0	0	0	0	0	0	0	0	0	0	NA	NA	NA	NA	NA
hsa-miR-5007-3p	0	0	0	0	0	0	0	0	0	0	0	0	0	0	NA	NA	NA	NA	NA
hsa-miR-5007-5p	0	0	0	0	0	0	0	0	0	0	0	0	0	0	NA	NA	NA	NA	NA
hsa-miR-5008-3p	0	0	0	0	0	0	0	0	0	0	0	0	0	0	NA	NA	NA	NA	NA
hsa-miR-5008-5p	0	0	0	0	0	0	0	0	0	0	0	0	0	0	NA	NA	NA	NA	NA
hsa-miR-5009-5p	0	0	0	0	0	0	0.665438	0.584664	1.18977	1.12394	1.06752	0.875693	0	0.917837	-0.300515	1.34886	-0.222793	0.823697	NA
hsa-miR-5010-3p	0	0	0	0	0	0	0.887251	2.04632	0.39659	1.12394	1.37253	1.31354	0	1.19003	-0.639679	1.31174	-0.487658	0.625792	NA
hsa-miR-5011-3p	0	0	0	0	0	0	0	0	0	0	0	0	0	0	NA	NA	NA	NA	NA
hsa-miR-5011-5p	0	0	0	0	0	0	0	0	0	0	0	0	0	0	NA	NA	NA	NA	NA
hsa-miR-504-3p	0	0	0	0	0	0	0	0	0	0	0	0	0	0	NA	NA	NA	NA	NA
hsa-miR-504-5p	0	0	0	0	0	0	0	0	0	1.12394	0.152503	0	0	0.21274	1.07449	1.89346	0.567474	0.570392	NA
hsa-miR-5047	0	0	0	0	0	0	0	0	0	0	0	0	0	0	NA	NA	NA	NA	NA
hsa-miR-506-3p	0	0	0	0	0	0	0	0	0	0	0	0	0	0	NA	NA	NA	NA	NA
hsa-miR-506-5p	0	0	0	0	0	0	0	0	0	0	0	0	0	0	NA	NA	NA	NA	NA
hsa-miR-507	0	0	0	0	0	0	0	0	0	0	0	0	0	0	NA	NA	NA	NA	NA
hsa-miR-508-3p	0	0	0	0	0	0	0	0.292332	0	0	0	0.218923	0	0.0852092	1.67414	1.89874	0.881711	0.377933	NA
hsa-miR-508-5p	0	0	0	0	0	0	0	0	0	0	0	0	0	0	NA	NA	NA	NA	NA
hsa-miR-5087	0	0	0	0	0	0	0	0	0	0	0	0	0	0	NA	NA	NA	NA	NA
hsa-miR-5088-3p	0	0	0	0	0	0	0	0	0	0	0	0	0	0	NA	NA	NA	NA	NA
hsa-miR-5089-3p	0	0	0	0	0	0	0	0	0	0	0	0	0	0	NA	NA	NA	NA	NA
hsa-miR-5089-5p	0	0	0	0	0	0	0	0	0	0	0	0	0	0	NA	NA	NA	NA	NA
hsa-miR-509-3-5p	0	0	0	0	0	0	0	0	0	0	0	0	0	0	NA	NA	NA	NA	NA
hsa-miR-509-3p	0	0	0	0	0	0	0	0	0.79318	0	0.152503	0.437847	0	0.230588	1.00044	1.89283	0.528542	0.597123	NA
hsa-miR-509-5p	0	0	0	0	0	0	0	0	0	0	0	0	0	0	NA	NA	NA	NA	NA
hsa-miR-5090	0	0	0	0	0	0	0.443625	0.292332	0.79318	0.374645	0.610012	1.09462	0	0.601402	0.215082	1.49723	0.143653	0.885774	NA
hsa-miR-5091	0	0	0	0	0	0	0.221813	0	0	1.12394	0.305006	0.218923	0	0.311613	0.748886	1.89097	0.396034	0.69208	NA
hsa-miR-5092	0	3.61717	0	0	0	0	0	0.584664	0	0	0	0.875693	0.602862	0.243393	1.58299	1.88457	0.839976	0.400922	NA
hsa-miR-5093	0	0	0	0	0	0	0	0	0	0	0	0	0	0	NA	NA	NA	NA	NA
hsa-miR-510-3p	0	0	0	0	0	0	0	0	0	0	0	0	0	0	NA	NA	NA	NA	NA
hsa-miR-510-5p	0	0	0	0	0	0	0	0	0	0	0	0	0	0	NA	NA	NA	NA	NA
hsa-miR-511-3p	0	0	0	0	0	0	0	0	0	0	0	0	0	0	NA	NA	NA	NA	NA
hsa-miR-511-5p	0	0	0	0	0	0	0	0	0.39659	0	0	0	0	0.0660983	2.00138	1.90091	1.05286	0.292406	NA
hsa-miR-512-3p	0	0	0	0	0	0	0	0	0	0	0.152503	0	0	0.0254172	2.07732	1.90112	1.09268	0.274533	NA
hsa-miR-512-5p	0	0	0	0	0	0	0	0	0	0	0	0	0	0	NA	NA	NA	NA	NA
hsa-miR-513a-3p	0	0	0	0	0	0	0	0	0	0	0	0	0	0	NA	NA	NA	NA	NA
hsa-miR-513a-5p	0	0	0	0	0	0	0	0	0	0	0	0	0	0	NA	NA	NA	NA	NA
hsa-miR-513b-3p	0	0	0	0	0	0	0	0	0	0	0	0	0	0	NA	NA	NA	NA	NA
hsa-miR-513b-5p	0	0	0	0	0	0	0	0	0	0	0	0	0	0	NA	NA	NA	NA	NA
hsa-miR-513c-3p	0	0	0	0	0	0	0	0	0	0	0	0	0	0	NA	NA	NA	NA	NA
hsa-miR-513c-5p	0	0	0	0	0	0	0	0	0	0	0	0	0	0	NA	NA	NA	NA	NA
hsa-miR-514a-3p	0	0	0	0	0	0	0	0	0	0	0	0	0	0	NA	NA	NA	NA	NA
hsa-miR-514a-5p	0	0	0	0	0	0	0	0	0	0	0	0	0	0	NA	NA	NA	NA	NA
hsa-miR-514b-3p	0	0	0	0	0	0	0	0	0	0	0	0	0	0	NA	NA	NA	NA	NA
hsa-miR-514b-5p	0	0	0	0	0	0	0	0	0	0	0	0	0	0	NA	NA	NA	NA	NA
hsa-miR-515-3p	0	0	0	0	0	0	0	0	0	0	0	0	0	0	NA	NA	NA	NA	NA
hsa-miR-515-5p	0	0	0	0	0	0	0	0	0	0	0	0.437847	0	0.0729744	1.73937	1.8992	0.91584	0.359751	NA
hsa-miR-516a-3p	0	0	0	0	0	0	0	0	0	0	0	0	0	0	NA	NA	NA	NA	NA
hsa-miR-516a-5p	0	0	0	0	0	0	0	0	0	0	0	0	0	0	NA	NA	NA	NA	NA
hsa-miR-516b-3p	0	0	0	0	0	0	0	0	0	0	0	0	0	0	NA	NA	NA	NA	NA
hsa-miR-516b-5p	0	0	0	0	0	0	0	0	0	0	0	0	0	0	NA	NA	NA	NA	NA
hsa-miR-517-5p	0	0	0	0	0	0	0	0	0	0	0	0	0	0	NA	NA	NA	NA	NA
hsa-miR-517a-3p	0	0	0	0	0	0	0	0	0	0	0	0	0	0	NA	NA	NA	NA	NA
hsa-miR-517b-3p	0	0	0	0	0	0	0	0	0	0	0	0	0	0	NA	NA	NA	NA	NA
hsa-miR-517c-3p	0	0	0	0	0	0	0	0	0	0	0	0	0	0	NA	NA	NA	NA	NA
hsa-miR-5186	0	0	0	0	0	0	0	0	0	0	0	0	0	0	NA	NA	NA	NA	NA
hsa-miR-5187-3p	0	2.89374	0	0	0	0	0	0.292332	0	0	0	0.65677	0.48229	0.158184	1.83136	1.89303	0.96742	0.333334	NA
hsa-miR-5187-5p	0	0	0	0	0	0	0	0	0	0	0	0	0	0	NA	NA	NA	NA	NA
hsa-miR-5188	0	0	0	0	0	0	0	0	0	0.374645	0	0	0	0.0624408	2.00138	1.90091	1.05286	0.292406	NA
hsa-miR-5189-3p	0	0	0	0	1.85766	0	0.443625	1.16933	0	2.24787	1.52503	0.875693	0.309609	1.04359	-0.0140312	1.35722	-0.0103382	0.991751	NA
hsa-miR-518a-3p	0	0	0	0	0	0	0	0	0	0	0	0	0	0	NA	NA	NA	NA	NA
hsa-miR-518a-5p	0	0	0	0	0	0	0	0	0	0	0	0	0	0	NA	NA	NA	NA	NA
hsa-miR-518b	0	0	0	0	0	0	0	0	0	0	0	0	0	0	NA	NA	NA	NA	NA
hsa-miR-518c-3p	0	0	0	0	0	0	0	0	0	0	0	0	0	0	NA	NA	NA	NA	NA
hsa-miR-518c-5p	0	0	0	0	0	0	0	0	0	0	0	0	0	0	NA	NA	NA	NA	NA
hsa-miR-518d-3p	0	0	0	0	0	0	0	0	0	0	0	0	0	0	NA	NA	NA	NA	NA
hsa-miR-518d-5p	0	0	0	0	0	0	0	0	0	0	0	0	0	0	NA	NA	NA	NA	NA
hsa-miR-518e-3p	0	0	0	0	0	0	0.221813	0	0	0	0	0	0	0.0369688	2.00138	1.90091	1.05286	0.292406	NA
hsa-miR-518e-5p	0	0	0	0	0	0	0	0	0	0	0	0	0	0	NA	NA	NA	NA	NA
hsa-miR-518f-3p	0	0	0	0	0	0	0	0	0	0	0	0	0	0	NA	NA	NA	NA	NA
hsa-miR-518f-5p	0	0	0	0	0	0	0	0	0	0	0	0	0	0	NA	NA	NA	NA	NA
hsa-miR-5190	0	0	0	0	0	0	0	0	0	0	0.305006	0	0	0.0508343	1.87324	1.90004	0.985897	0.324184	NA
hsa-miR-5192	0	0	0	0	0	0	0	0	0	0	0	0	0	0	NA	NA	NA	NA	NA
hsa-miR-5193	0	0	0	0	0	0	0.221813	0	0	0	0	0	0	0.0369688	2.00138	1.90091	1.05286	0.292406	NA
hsa-miR-5194	0	0	0	0	0	0	0	0	0	0	0	0	0	0	NA	NA	NA	NA	NA
hsa-miR-5195-3p	0	0	0	0	0	0	0	0	0	0	0	0	0	0	NA	NA	NA	NA	NA
hsa-miR-5195-5p	0	0	0	0	0	0	0	0	0	0	0	0	0	0	NA	NA	NA	NA	NA
hsa-miR-5196-3p	0	0	0	0	0	0	0	0	0	0	0	0	0	0	NA	NA	NA	NA	NA
hsa-miR-5196-5p	0	0	0	0	0	0	0	0	0	0	0	0	0	0	NA	NA	NA	NA	NA
hsa-miR-5197-3p	0	0	0	0	0	0	0	0	0	0	0	0	0	0	NA	NA	NA	NA	NA
hsa-miR-5197-5p	0	0	0	0	0	0	0	0	0	0	0	0	0	0	NA	NA	NA	NA	NA
hsa-miR-519a-2-5p	0	0	0	0	0	0	0	0	0	0	0	0	0	0	NA	NA	NA	NA	NA
hsa-miR-519a-3p	0	0	0	0	0	0	0	0	0	0	0	0	0	0	NA	NA	NA	NA	NA
hsa-miR-519a-5p	0	0	0	0	0	0	0	0	0	0	0	0	0	0	NA	NA	NA	NA	NA
hsa-miR-519b-3p	0	0	0	0	0	0	0	0	0	0	0	0	0	0	NA	NA	NA	NA	NA
hsa-miR-519b-5p	0	0	0	0	0	0	0	0	0	0	0	0	0	0	NA	NA	NA	NA	NA
hsa-miR-519c-3p	0	0	0	0	0	0	0	0	0	0	0	0	0	0	NA	NA	NA	NA	NA
hsa-miR-519c-5p	0	0	0	0	0	0	0	0	0	0	0	0	0	0	NA	NA	NA	NA	NA
hsa-miR-519d-3p	0	0	0	0	0	0	0	0	0	0	0	0	0	0	NA	NA	NA	NA	NA
hsa-miR-519d-5p	0	0	0	0	0	0	0	0	0	0	0	0	0	0	NA	NA	NA	NA	NA
hsa-miR-519e-3p	0	0	0	0	0	0	0	0	0	0	0	0	0	0	NA	NA	NA	NA	NA
hsa-miR-519e-5p	0	0	0	0	0	0	0	0	0	0	0	0	0	0	NA	NA	NA	NA	NA
hsa-miR-520a-3p	0	0	0	0	0	0	0	0	0	0	0	0	0	0	NA	NA	NA	NA	NA
hsa-miR-520a-5p	0	0	0	0	0	0	0	0	0	0	0	0	0	0	NA	NA	NA	NA	NA
hsa-miR-520b-3p	0	0	0	0	0	0	0	0	0	0	0	0	0	0	NA	NA	NA	NA	NA
hsa-miR-520b-5p	0	0	0	0	0	0	0	0	0	0	0	0	0	0	NA	NA	NA	NA	NA
hsa-miR-520c-3p	0	0	0	0	0	0	0	0	0	0	0	0	0	0	NA	NA	NA	NA	NA
hsa-miR-520c-5p	0	0	0	0	0	0	0	0	0	0	0	0	0	0	NA	NA	NA	NA	NA
hsa-miR-520d-3p	0	0	0	0	0	0	0	0	0	0	0	0	0	0	NA	NA	NA	NA	NA
hsa-miR-520d-5p	0	0	0	0	0	0	0	0	0	0	0	0	0	0	NA	NA	NA	NA	NA
hsa-miR-520e-3p	0	0	0	0	0	0	0	0	0	0	0	0	0	0	NA	NA	NA	NA	NA
hsa-miR-520e-5p	0	0	0	0	0	0	0	0	0	0	0	0	0	0	NA	NA	NA	NA	NA
hsa-miR-520f-3p	0	0	0	0	0	0	0	0	0	0	0	0	0	0	NA	NA	NA	NA	NA
hsa-miR-520f-5p	0	0	0	0	0	0	0	0	0	0	0	0	0	0	NA	NA	NA	NA	NA
hsa-miR-520g-3p	0	0	0	0	0	0	0	0	0	0	0	0	0	0	NA	NA	NA	NA	NA
hsa-miR-520g-5p	0	0	0	0	0	0	0	0	0	0	0	0	0	0	NA	NA	NA	NA	NA
hsa-miR-520h	0	0	0	0	0	0	0	0	0	0	0	0	0	0	NA	NA	NA	NA	NA
hsa-miR-521	0	0	0	0	0	0	0	0	0	0	0	0	0	0	NA	NA	NA	NA	NA
hsa-miR-522-3p	0	0	0	0	0	0	0	0	0	0	0	0	0	0	NA	NA	NA	NA	NA
hsa-miR-522-5p	0	0	0	0	0	0	0	0	0	0	0	0	0	0	NA	NA	NA	NA	NA
hsa-miR-523-3p	0	0	0	0	0	0	0	0	0	0	0	0	0	0	NA	NA	NA	NA	NA
hsa-miR-523-5p	0	0	0	0	0	0	0	0	0	0	0	0	0	0	NA	NA	NA	NA	NA
hsa-miR-524-3p	0	0	0	0	0	0	0	0	0	0	0	0	0	0	NA	NA	NA	NA	NA
hsa-miR-524-5p	0	0	0	0	0	0	0	0	0	0	0	0	0	0	NA	NA	NA	NA	NA
hsa-miR-525-3p	0	0	0	0	0	0	0	0	0	0	0	0	0	0	NA	NA	NA	NA	NA
hsa-miR-525-5p	0	0	0	0	0	0	0	0	0	0	0	0	0	0	NA	NA	NA	NA	NA
hsa-miR-526a-3p	0	0	0	0	0	0	0	0	0	0	0	0	0	0	NA	NA	NA	NA	NA
hsa-miR-526a-5p	0	0	0	0	0	0	0	0	0	0	0	0	0	0	NA	NA	NA	NA	NA
hsa-miR-526b-3p	0	0	0	0	0	0	0	0	0	0	0	0	0	0	NA	NA	NA	NA	NA
hsa-miR-526b-5p	0	0	0	0	0	0	0	0	0	0	0	0	0	0	NA	NA	NA	NA	NA
hsa-miR-527	0	0	0	0	0	0	0	0	0	0	0	0	0	0	NA	NA	NA	NA	NA
hsa-miR-544b	0	0	0	0	0	0	0	0	0	0	0.457509	0	0	0.0762515	1.70364	1.89898	0.897133	0.369648	NA
hsa-miR-545-5p	0	2.89374	0	0	0	0	1.10906	0.584664	0	0	0.305006	0.218923	0.48229	0.369609	1.39191	1.64877	0.844212	0.398551	NA
hsa-miR-548a-3p	0	0	0	4.95023	0	0	0.443625	0	0	0	0.305006	0	0.825038	0.124772	2.25093	1.8464	1.21909	0.222808	NA
hsa-miR-548a-5p	0	0	0	0	5.57297	0	0.665438	0	0	0	0.305006	0	0.928828	0.161741	2.20601	1.84095	1.1983	0.2308	NA
hsa-miR-548aa	0	5.06404	0	0	0	0	0	0.292332	0.39659	0	0	0	0.844007	0.11482	2.52335	1.85181	1.36265	0.172994	NA
hsa-miR-548ab	0	2.89374	0	0	0	0	0.443625	0	0	0.374645	1.98254	0	0.48229	0.466801	1.02602	1.78255	0.575592	0.564891	NA
hsa-miR-548ac	0	0	0	0	0	0	0	0	0	0	0.152503	0	0	0.0254172	2.07732	1.90112	1.09268	0.274533	NA
hsa-miR-548ad-3p	0	0	0	0	0	0	0	0	0	0	0	0	0	0	NA	NA	NA	NA	NA
hsa-miR-548ae-3p	0	0	0	0	0	0	0	0	0	0	0	0	0	0	NA	NA	NA	NA	NA
hsa-miR-548ah-5p	0	0	0	0	0	0	0	0	0	0	0	0	0	0	NA	NA	NA	NA	NA
hsa-miR-548ai	0	0	0	0	0	0	0	0	0	0	0	0	0	0	NA	NA	NA	NA	NA
hsa-miR-548aj-3p	0	1.44687	0	0	0	0	0	0	0	0	0	0	0.241145	0	2.73642	1.90076	1.43965	0.149967	NA
hsa-miR-548ak	0	0.723435	0	0	0	0	0.887251	0	0	0	0	0	0.120572	0.147875	1.52439	1.89502	0.804417	0.421156	NA
hsa-miR-548am-3p	0	0	0	0	0	0	0.887251	0.876996	0.79318	0	0.305006	1.09462	0	0.659508	0.112914	1.61202	0.0700451	0.944158	NA
hsa-miR-548an	0	0	0	0	0	0	0	0	0	0.74929	0	0	0	0.124882	1.5235	1.8976	0.802855	0.422059	NA
hsa-miR-548ao-3p	0	0	0	0	0	0	0.221813	0.292332	0	0	0	0	0	0.0856908	1.67143	1.89872	0.880295	0.3787	NA
hsa-miR-548ao-5p	0	0	0	0	0	0	0	0	0	0	0	0	0	0	NA	NA	NA	NA	NA
hsa-miR-548ap-3p	0	1.44687	0	0	0	0	0	0.292332	0	0	0	0	0.241145	0.048722	2.34935	1.8993	1.23695	0.216104	NA
hsa-miR-548aq-5p	0	0	0	0	0	0	0	0	0	0	0	0	0	0	NA	NA	NA	NA	NA
hsa-miR-548ar-3p	0	0	0	0	0	0	0	0	0.39659	0	0.305006	0	0	0.116933	1.54199	1.89774	0.812543	0.41648	NA
hsa-miR-548as-3p	0	0	0	0	0	0	0	0	0	0	0	0	0	0	NA	NA	NA	NA	NA
hsa-miR-548as-5p	0	0	0	0	0	0	0.221813	0.292332	0.39659	0.374645	0.457509	1.53246	0	0.545892	0.319244	1.55964	0.20469	0.837814	NA
hsa-miR-548at-3p	0	0	0	0	0	0	0	0	0	0	0	0.218923	0	0.0364872	2.00398	1.90092	1.05422	0.291783	NA
hsa-miR-548at-5p	0	0.723435	0	0	0	0	0	2.63099	0.39659	3.74645	0.762515	0	0.120572	1.25609	-0.387344	1.59537	-0.242793	0.808166	NA
hsa-miR-548au-3p	0	0	0	0	0	0	0	0	0	0	0	0	0	0	NA	NA	NA	NA	NA
hsa-miR-548aw	0	0	0	0	0	0	0.221813	0	0	0	0	0	0	0.0369688	2.00138	1.90091	1.05286	0.292406	NA
hsa-miR-548ax	0	0	0	0	0	0	0	0	0	0	0	0.437847	0	0.0729744	1.73937	1.8992	0.91584	0.359751	NA
hsa-miR-548az-3p	0	0	0	0	0	0	0	0	0	0	0	0	0	0	NA	NA	NA	NA	NA
hsa-miR-548b-3p	0	0	0	0	0	0	0	0	0	0	0.305006	0	0	0.0508343	1.87324	1.90004	0.985897	0.324184	NA
[truncated: 659 more rows]
